# Supplementary material
Source: publisher site journal article supplement (https://www.dovepress.com/article/592553)
Supplement: Supplementary file 1 [file 592553%20Supplementary%20Materials.docx]

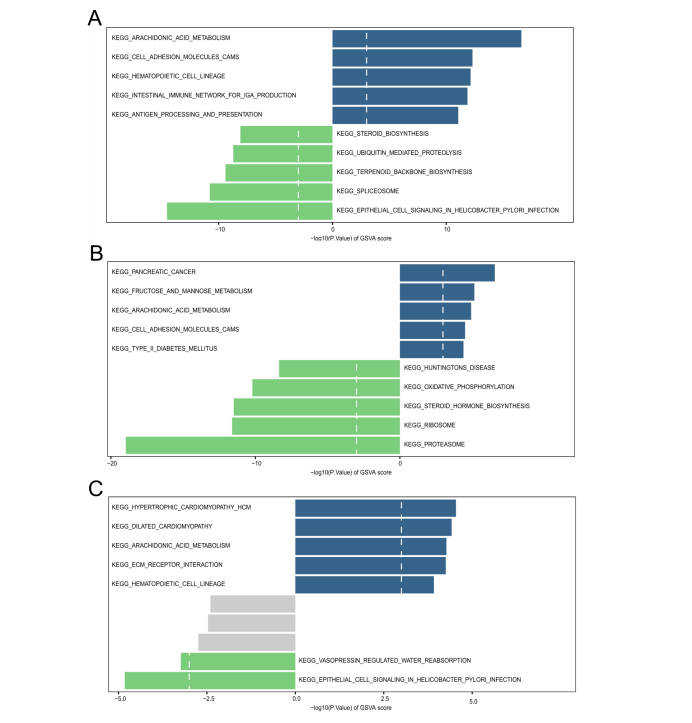


**Supplementary Figure 1** GSVA enrichment of hallmark pathways across clusters

GSVA bar graphs depicting divergent pathway enrichments in keratocyte clusters 6 through 8, comparing psoriasis to normal conditions. Blue and green denote upregulated and downregulated pathways, respectively.(A) GSVA bar plot for Cluster 6. (B) GSVA bar plot for Cluster 7. (C) GSVA bar plot for Cluster 8.


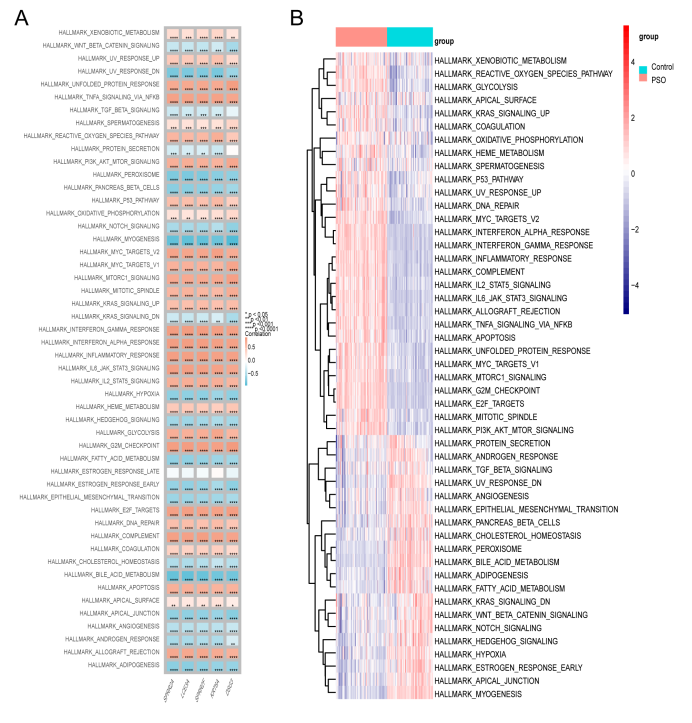


**Supplementary Figure 2** Hallmark pathway enrichment linked to hub genes

1. Heatmap showing the correlation between the top five ranked hub genes and 50 hallmark pathways. The color scale represents the correlation coefficient, with red indicating positive correlation and blue indicating negative correlation.
   (B) Bar plot displaying the enrichment status of the 50 hallmark pathways in the psoriasis group compared with normal controls. Red bars denote upregulated pathways (30 pathways), and blue bars denote downregulated pathways (20 pathways).

**Supplementary Table 1 Autophagy gene**

| GOBP_REGULATION_OF_AUTOPHAGY |
| --- |
| ABL1 |
| ABL2 |
| ACER2 |
| ADCY10 |
| ADRA1A |
| ADRB2 |
| AKT1 |
| AMBRA1 |
| ATF6 |
| ATG101 |
| ATG12 |
| ATG13 |
| ATG14 |
| ATG16L1 |
| ATG2A |
| ATG5 |
| ATM |
| ATP13A2 |
| ATP6V0A1 |
| ATP6V0A2 |
| ATP6V0B |
| ATP6V0C |
| ATP6V0D1 |
| ATP6V0D2 |
| ATP6V0E1 |
| ATP6V0E2 |
| ATP6V1A |
| ATP6V1B1 |
| ATP6V1B2 |
| ATP6V1C1 |
| ATP6V1C2 |
| ATP6V1D |
| ATP6V1E1 |
| ATP6V1E2 |
| ATP6V1G1 |
| ATP6V1G2 |
| ATP6V1H |
| BAD |
| BAG3 |
| BCL2 |
| BECN1 |
| BMF |
| BNIP3 |
| BNIP3L |
| BOK |
| C9orf72 |
| CALCOCO2 |
| CAMKK2 |
| CAPN1 |
| CAPNS1 |
| CASP3 |
| CCNY |
| CDK16 |
| CDK5 |
| CDK5R1 |
| CERS1 |
| CHMP4B |
| CISD1 |
| CISD2 |
| CLEC16A |
| CLN3 |
| CPTP |
| CRYBA1 |
| CSNK2A2 |
| CTSA |
| CTTN |
| DAP |
| DAPK1 |
| DAPK2 |
| DAPK3 |
| DAPL1 |
| DCAF12 |
| DCN |
| DDIT3 |
| DEPDC5 |
| DEPP1 |
| DEPTOR |
| DHRSX |
| DNM1L |
| DRAM1 |
| DRAM2 |
| EEF1A1 |
| EEF1A2 |
| EHMT2 |
| EIF4E |
| EIF4G1 |
| EIF4G2 |
| EIF4G3 |
| ELAPOR1 |
| ENDOG |
| EP300 |
| EPM2A |
| ERCC4 |
| ERFE |
| ERN1 |
| EXOC1 |
| EXOC4 |
| EXOC7 |
| EXOC8 |
| FBXL2 |
| FBXO7 |
| FBXW7 |
| FEZ1 |
| FEZ2 |
| FKBP8 |
| FLCN |
| FOXK1 |
| FOXK2 |
| FOXO1 |
| FOXO3 |
| FYCO1 |
| FZD5 |
| GAPDH |
| GATA4 |
| GBA1 |
| GFAP |
| GNAI3 |
| GOLGA2 |
| GPR137 |
| GPR137B |
| GPSM1 |
| GSK3A |
| GSK3B |
| HAX1 |
| HDAC6 |
| HERC1 |
| HGF |
| HIF1A |
| HMGB1 |
| HMOX1 |
| HSPB1 |
| HSPB8 |
| HTRA2 |
| HTT |
| IFI16 |
| IFNB1 |
| IFNG |
| IKBKG |
| IL10 |
| IL10RA |
| IL4 |
| IRGM |
| ITPR1 |
| KAT5 |
| KAT8 |
| KDM4A |
| KDR |
| KEAP1 |
| KIF25 |
| KLHL22 |
| LACRT |
| LAMP3 |
| LARP1 |
| LEP |
| LEPR |
| LRRK2 |
| LRSAM1 |
| LZTS1 |
| MAGEA3 |
| MAGEA6 |
| MAP3K7 |
| MAPK15 |
| MAPK3 |
| MAPK8 |
| MAPT |
| MCL1 |
| MEFV |
| MET |
| MFSD8 |
| MID2 |
| MIR199A1 |
| MIRLET7B |
| MLST8 |
| MOAP1 |
| MTCL1 |
| MTDH |
| MTM1 |
| MTMR3 |
| MTMR4 |
| MTMR8 |
| MTMR9 |
| MTOR |
| NEDD4 |
| NLRP6 |
| NOD1 |
| NOD2 |
| NPC1 |
| NPRL2 |
| NPRL3 |
| NRBP2 |
| NUPR1 |
| OPTN |
| ORMDL3 |
| OSBPL7 |
| PAFAH1B2 |
| PARK7 |
| PARL |
| PHF23 |
| PIK3C2A |
| PIK3C3 |
| PIK3CA |
| PIK3CB |
| PIK3R2 |
| PIK3R4 |
| PIM2 |
| PINK1 |
| PIP4K2A |
| PIP4K2B |
| PIP4K2C |
| PLEKHF1 |
| PLK2 |
| PLK3 |
| POLDIP2 |
| PRKAA1 |
| PRKAA2 |
| PRKACA |
| PRKD1 |
| PRKN |
| PSAP |
| PTPN22 |
| PYCARD |
| QSOX1 |
| RAB39B |
| RAB3GAP1 |
| RAB3GAP2 |
| RAB8A |
| RALB |
| RASIP1 |
| RB1CC1 |
| RFPL1 |
| RFPL2 |
| RFPL3 |
| RFPL4A |
| RFPL4AL1 |
| RHEB |
| RIPK2 |
| RMC1 |
| RNF152 |
| RNF31 |
| RNF41 |
| RNF5 |
| ROCK1 |
| RPTOR |
| RRAGA |
| RRAGB |
| RRAGC |
| RRAGD |
| RUBCN |
| RUFY4 |
| SCFD1 |
| SCOC |
| SEC22B |
| SESN1 |
| SESN2 |
| SESN3 |
| SETD2 |
| SH3BP4 |
| SH3GLB1 |
| SIRT1 |
| SIRT2 |
| SLC25A4 |
| SLC25A5 |
| SLC35D3 |
| SLC7A5 |
| SMCR8 |
| SNCA |
| SNRNP70 |
| SNX18 |
| SNX30 |
| SNX32 |
| SNX4 |
| SNX5 |
| SNX6 |
| SNX7 |
| SOGA1 |
| SOGA3 |
| SPTLC1 |
| SPTLC2 |
| SQSTM1 |
| SREBF1 |
| SREBF2 |
| STAT3 |
| STING1 |
| STK11 |
| STK38L |
| SUPT5H |
| SVIP |
| TAB2 |
| TAB3 |
| TBC1D14 |
| TBC1D25 |
| TBK1 |
| TECPR1 |
| TFEB |
| TICAM1 |
| TIGAR |
| TLK2 |
| TLR9 |
| TMEM39A |
| TMEM59 |
| TOM1 |
| TP53 |
| TP53INP1 |
| TPCN1 |
| TPCN2 |
| TREM2 |
| TRIB3 |
| TRIM13 |
| TRIM21 |
| TRIM22 |
| TRIM23 |
| TRIM27 |
| TRIM32 |
| TRIM34 |
| TRIM38 |
| TRIM5 |
| TRIM58 |
| TRIM6 |
| TRIM65 |
| TRIM68 |
| TRIM8 |
| TSC1 |
| TSC2 |
| TSPO |
| UBQLN1 |
| UBQLN2 |
| UBQLN4 |
| UCHL1 |
| UFL1 |
| ULK1 |
| ULK2 |
| ULK3 |
| USP10 |
| USP13 |
| USP20 |
| USP30 |
| USP33 |
| USP36 |
| UVRAG |
| VDAC1 |
| VHL |
| VPS13C |
| VPS13D |
| VPS26A |
| VPS26B |
| VPS29 |
| VPS35 |
| WAC |
| WASHC1 |
| WDR24 |
| WDR41 |
| WDR45 |
| WDR6 |
| WIPI1 |
| WNK1 |
| ZC3H12A |
| ZKSCAN3 |
| ZMPSTE24 |

**Supplementary Table 2 Primers for qRT-PCR analysis of genes**

| **Species** | **Gene Symbol** | **Primer Sequences (5′ → 3′)** | **Amplicon Size (bp)** |
| --- | --- | --- | --- |
| Human | SPRR2B | Forward-TTTGGAGAAACTGGTTAATCCTGAG | 33 |
| Human | SPRR2B | Reverse-CTCTGGGCACTTTGGCGTG | 27 |
| Mouse | SPRR2B | Forward-TCCTGGTACTCAAGCATTGGTC | 30 |
| Mouse | SPRR2B | Reverse-CACTGCTGCTGGTGGTAAGA | 28 |
| Human | LGI2 | Forward-TGGAGAACTGCATGGTGCTGGA | 30 |
| Human | LGI2 | Reverse-CTTACAGCCCACGATGGACTGA | 30 |
| Mouse | LGI2 | Forward-GCTGTGTATCGGTCCACCAGAA | 30 |
| Mouse | LGI2 | Reverse-GGAGAGTTCCAACTGCCATCCT | 30 |
| Human | KRT6C | Forward-AAGCCAAGGCAGACACTCTCAC | 30 |
| Human | KRT6C | Reverse-TGGATAGCACCACGGATGTGTC | 30 |
| Mouse | KRT6C | Forward-TTCATCGACAAGGTGCGGTT | 28 |
| Mouse | KRT6C | Reverse-CTAGCTCTTTGCGGAGGTCG | 28 |
| Human | PKP3 | Forward- GCCTACATCCAGCACAAGTGCT | 31 |
| Human | PKP3 | Reverse-GCGTTGTCGTAGATGAGGTTGC | 30 |
| Mouse | PKP3 | Forward-CTCATCCAGCAGAATGCCTCAG | 30 |
| Mouse | PKP3 | Reverse-TGTAGGTGACCAGAGCATCCAC | 30 |
| Human | KRT84 | Forward-TGTGCGAGTACCAGGAGCTGAT | 30 |
| Human | KRT84 | Reverse-CTGGTCCAACACCTTCACAGAG | 30 |
| Mouse | KRT84 | Forward-CCAGACCAAGTATGAGGAGATGC | 31 |
| Mouse | KRT84 | Reverse-CAGTTTGGCACACTGAGCCTTG | 30 |
| Human | KRT75 | Forward-AGCCAAGGTCAAATCTCTGCCC | 30 |
| Human | KRT75 | Reverse-ATGGACAGCACCACGGATGTGT | 30 |
| Mouse | KRT75 | Forward-CAGTGCCTACATGAACAAGGTGG | 31 |
| Mouse | KRT75 | Reverse-AGGACCACAGAGGTGTCACTCA | 30 |
| Human | KRT6B | Forward-GCCAAGGCAGACACTCTTACAG | 30 |
| Human | KRT6B | Reverse-TGGATAGCACCACGGATGTGTC | 30 |
| Mouse | KRT6B | Forward-GGACATTGCTCAGAGAAGTCGG | 30 |
| Mouse | KRT6B | Reverse-CAATCTCCTGCTTGGTGTTGCG | 30 |
| Human | β-actin | Forward-CACCATTGGCAATGAGCGGTTC | 30 |
| Human | β-actin | Reverse-AGGTCTTTGCGGATGTCCACGT | 30 |
| Mouse | β-actin | Forward-CATTGCTGACAGGATGCAGAAGG | 31 |
| Mouse | β-actin | Reverse-TGCTGGAAGGTGGACAGTGAGG | 30 |

**Supplementary Table 3 Marker**

| "celltype" | "marker" |
| --- | --- |
| "NK_cell" | "KLRB1" |
| "NK_cell" | "GNLY" |
| "T_cell" | "CD3D" |
| "T_cell" | "TRAC" |
| "T_cell" | "TRBC1" |
| "T_cell" | "CD8A" |
| "T_cell" | "GZMK" |
| "Mature_DC" | "LAMP3" |
| "Mature_DC" | "LY75" |
| "Mature_DC" | "CIITA" |
| "Mature_DC" | "HLA-DRA" |
| "Semimature_DC" | "LYZ" |
| "Melanocyte" | "DCT" |
| "Melanocyte" | "TYRP1" |
| "Melanocyte" | "MLANA" |
| "KC-S.Corneum" | "SPRR2G" |
| "KC-S.Spinosum" | "KRT10" |
| "KC-S.Basale" | "KRT14" |
| "KC-S.Basale" | "KRT5" |
| "Fibroblast" | "DCN" |
| "Fibroblast" | "COL1A1" |

**Supplementary Table 4 GO_branchPoint2_cluster**

| **ONTOLOGY** | **ID** | **Description** | **GeneRatio** | **BgRatio** | **pvalue** | **p.adjust** | **qvalue** | **geneID** | **Count** | **cluster** |  |
| --- | --- | --- | --- | --- | --- | --- | --- | --- | --- | --- | --- |
| **GO:0061077** | **BP** | **GO:0061077** | **chaperone-mediated protein folding** | **8/123** | **67/18723** | **1.30048523045406e-08** | **3.5217140040696e-05** | **2.97605778000751e-05** | **HSPB1/HSPA1A/HSPA2/DNAJB14/DNAJB1/HSPH1/PPIB/CHORDC1** | **8** | **1** |
| **GO:0097193** | **BP** | **GO:0097193** | **intrinsic apoptotic signaling pathway** | **13/123** | **288/18723** | **5.58932066085155e-08** | **7.56794017479299e-05** | **6.39535953510067e-05** | **SFN/CEBPB/DDIT3/BBC3/IVNS1ABP/HSPB1/CAV1/SNAI1/HSPA1A/DDIT4/HERPUD1/IFI6/SLC9A3R1** | **13** | **1** |
| **GO:0035966** | **BP** | **GO:0035966** | **response to topologically incorrect protein** | **10/123** | **159/18723** | **9.6768989110485e-08** | **8.39019946389435e-05** | **7.09021753654137e-05** | **DDIT3/HSPB1/HSPA1A/HSPA2/HERPUD1/DNAJB14/HSP90AB1/DNAJB1/HSPH1/DNAJB9** | **10** | **1** |
| **GO:0034976** | **BP** | **GO:0034976** | **response to endoplasmic reticulum stress** | **12/123** | **256/18723** | **1.23932045256933e-07** | **8.39019946389435e-05** | **7.09021753654137e-05** | **CEBPB/DDIT3/BBC3/JUN/CAV1/HSPA1A/HERPUD1/DNAJB14/SVIP/DNAJB9/TMEM259/NCCRP1** | **12** | **1** |
| **GO:0006986** | **BP** | **GO:0006986** | **response to unfolded protein** | **9/123** | **137/18723** | **3.00053702613756e-07** | **0.00016250908533561** | **0.000137329841996275** | **DDIT3/HSPB1/HSPA1A/HSPA2/HERPUD1/HSP90AB1/DNAJB1/HSPH1/DNAJB9** | **9** | **1** |
| **GO:0043618** | **BP** | **GO:0043618** | **regulation of transcription from RNA polymerase II promoter in response to stress** | **6/123** | **47/18723** | **6.12533195506045e-07** | **0.000246695682271815** | **0.000208472523229001** | **CEBPB/DDIT3/EGR1/JUN/HSPA1A/DNAJB1** | **6** | **1** |
| **GO:2001233** | **BP** | **GO:2001233** | **regulation of apoptotic signaling pathway** | **13/123** | **356/18723** | **6.37691940879878e-07** | **0.000246695682271815** | **0.000208472523229001** | **DDIT3/BBC3/IVNS1ABP/HSPB1/CAV1/SNAI1/HSPA1A/HERPUD1/CTNNB1/IFI6/FGFR1/ITGAV/SLC9A3R1** | **13** | **1** |
| **GO:1905897** | **BP** | **GO:1905897** | **regulation of response to endoplasmic reticulum stress** | **7/123** | **82/18723** | **1.12418616983487e-06** | **0.000369937627645806** | **0.000312619296626752** | **DDIT3/CAV1/HSPA1A/HERPUD1/SVIP/DNAJB9/TMEM259** | **7** | **1** |
| **GO:0043620** | **BP** | **GO:0043620** | **regulation of DNA-templated transcription in response to stress** | **6/123** | **53/18723** | **1.26820736061923e-06** | **0.000369937627645806** | **0.000312619296626752** | **CEBPB/DDIT3/EGR1/JUN/HSPA1A/DNAJB1** | **6** | **1** |
| **GO:2001242** | **BP** | **GO:2001242** | **regulation of intrinsic apoptotic signaling pathway** | **9/123** | **164/18723** | **1.3660916825916e-06** | **0.000369937627645806** | **0.000312619296626752** | **DDIT3/BBC3/IVNS1ABP/HSPB1/CAV1/SNAI1/HSPA1A/HERPUD1/SLC9A3R1** | **9** | **1** |
| **GO:0009266** | **BP** | **GO:0009266** | **response to temperature stimulus** | **9/123** | **178/18723** | **2.69190784814385e-06** | **0.00060786353824951** | **0.000513680841232386** | **NFKBIA/FOS/HSPA1A/IER5/VGF/HSPA2/HSP90AB1/DNAJB1/CHORDC1** | **9** | **1** |
| **GO:0051085** | **BP** | **GO:0051085** | **chaperone cofactor-dependent protein refolding** | **5/123** | **34/18723** | **2.69363458603919e-06** | **0.00060786353824951** | **0.000513680841232386** | **HSPA1A/HSPA2/DNAJB14/DNAJB1/HSPH1** | **5** | **1** |
| **GO:1901216** | **BP** | **GO:1901216** | **positive regulation of neuron death** | **7/123** | **97/18723** | **3.50211950747779e-06** | **0.000729518432788451** | **0.000616486462287994** | **DDIT3/EGR1/FOS/JUN/DDIT4/CTNNB1/EFNB2** | **7** | **1** |
| **GO:0051084** | **BP** | **GO:0051084** | **'de novo' posttranslational protein folding** | **5/123** | **39/18723** | **5.42917793588887e-06** | **0.0010501581321705** | **0.000887446077640781** | **HSPA1A/HSPA2/DNAJB14/DNAJB1/HSPH1** | **5** | **1** |
| **GO:0036503** | **BP** | **GO:0036503** | **ERAD pathway** | **7/123** | **107/18723** | **6.73406046967574e-06** | **0.00121572238345879** | **0.00102735771656667** | **CAV1/HERPUD1/DNAJB14/SVIP/DNAJB9/TMEM259/NCCRP1** | **7** | **1** |
| **GO:1904292** | **BP** | **GO:1904292** | **regulation of ERAD pathway** | **4/123** | **20/18723** | **7.92097226554007e-06** | **0.0013317883465822** | **0.00112544035818616** | **CAV1/HERPUD1/SVIP/TMEM259** | **4** | **1** |
| **GO:1901214** | **BP** | **GO:1901214** | **regulation of neuron death** | **11/123** | **319/18723** | **8.36056199848501e-06** | **0.0013317883465822** | **0.00112544035818616** | **CEBPB/DDIT3/EGR1/FOS/JUN/DDIT4/CTNNB1/HSP90AB1/EFNB2/LIG4/TMEM259** | **11** | **1** |
| **GO:0006458** | **BP** | **GO:0006458** | **'de novo' protein folding** | **5/123** | **43/18723** | **8.88842827688367e-06** | **0.00133721465410005** | **0.00113002591075702** | **HSPA1A/HSPA2/DNAJB14/DNAJB1/HSPH1** | **5** | **1** |
| **GO:0006457** | **BP** | **GO:0006457** | **protein folding** | **9/123** | **212/18723** | **1.11385861271864e-05** | **0.00158754164381162** | **0.00134156710473702** | **HSPB1/HSPA1A/HSPA2/DNAJB14/HSP90AB1/DNAJB1/HSPH1/PPIB/CHORDC1** | **9** | **1** |
| **GO:0043161** | **BP** | **GO:0043161** | **proteasome-mediated ubiquitin-dependent protein catabolic process** | **12/123** | **412/18723** | **1.75016020535151e-05** | **0.00236971691804595** | **0.0020025517297022** | **DDIT3/CAV1/HSPA1A/HERPUD1/CTNNB1/DNAJB14/HSP90AB1/SVIP/TBL1XR1/OGT/DNAJB9/NCCRP1** | **12** | **1** |
| **GO:0061436** | **BP** | **GO:0061436** | **establishment of skin barrier** | **4/123** | **25/18723** | **2.01621879626047e-05** | **0.00242684014049139** | **0.00205082424995269** | **SFN/CLDN4/ELOVL1/GRHL3** | **4** | **1** |
| **GO:0030433** | **BP** | **GO:0030433** | **ubiquitin-dependent ERAD pathway** | **6/123** | **85/18723** | **2.03593116781497e-05** | **0.00242684014049139** | **0.00205082424995269** | **CAV1/HERPUD1/DNAJB14/SVIP/DNAJB9/NCCRP1** | **6** | **1** |
| **GO:0010498** | **BP** | **GO:0010498** | **proteasomal protein catabolic process** | **13/123** | **490/18723** | **2.06120100558722e-05** | **0.00242684014049139** | **0.00205082424995269** | **DDIT3/CAV1/HSPA1A/HERPUD1/CTNNB1/DNAJB14/HSP90AB1/SVIP/TBL1XR1/OGT/DNAJB9/TMEM259/NCCRP1** | **13** | **1** |
| **GO:0070997** | **BP** | **GO:0070997** | **neuron death** | **11/123** | **361/18723** | **2.63943751291438e-05** | **0.00297816532707173** | **0.0025167268215245** | **CEBPB/DDIT3/EGR1/FOS/JUN/DDIT4/CTNNB1/HSP90AB1/EFNB2/LIG4/TMEM259** | **11** | **1** |
| **GO:0033561** | **BP** | **GO:0033561** | **regulation of water loss via skin** | **4/123** | **27/18723** | **2.7689296697823e-05** | **0.00299930461830818** | **0.0025345907798344** | **SFN/CLDN4/ELOVL1/GRHL3** | **4** | **1** |
| **GO:0001836** | **BP** | **GO:0001836** | **release of cytochrome c from mitochondria** | **5/123** | **59/18723** | **4.25095542241611e-05** | **0.00440590345184573** | **0.00372325044869495** | **SFN/BBC3/JUN/IFI6/GGCT** | **5** | **1** |
| **GO:0090084** | **BP** | **GO:0090084** | **negative regulation of inclusion body assembly** | **3/123** | **11/18723** | **4.39288748891561e-05** | **0.00440590345184573** | **0.00372325044869495** | **HSPA1A/HSPA2/DNAJB1** | **3** | **1** |
| **GO:0008544** | **BP** | **GO:0008544** | **epidermis development** | **10/123** | **324/18723** | **5.59143188176227e-05** | **0.00527569639040637** | **0.00445827721089304** | **SFN/FABP5/YBX1/SNAI1/CTNNB1/CALML5/CSTA/GRHL3/SLC9A3R1/TGM3** | **10** | **1** |
| **GO:0097201** | **BP** | **GO:0097201** | **negative regulation of transcription from RNA polymerase II promoter in response to stress** | **3/123** | **12/18723** | **5.82908704739815e-05** | **0.00527569639040637** | **0.00445827721089304** | **JUN/HSPA1A/DNAJB1** | **3** | **1** |
| **GO:0070059** | **BP** | **GO:0070059** | **intrinsic apoptotic signaling pathway in response to endoplasmic reticulum stress** | **5/123** | **63/18723** | **5.84456764077515e-05** | **0.00527569639040637** | **0.00445827721089304** | **CEBPB/DDIT3/BBC3/HSPA1A/HERPUD1** | **5** | **1** |
| **GO:0008637** | **BP** | **GO:0008637** | **apoptotic mitochondrial changes** | **6/123** | **107/18723** | **7.48079259962039e-05** | **0.00633634975677922** | **0.0053545923856169** | **SFN/BBC3/JUN/HSPA1A/IFI6/GGCT** | **6** | **1** |
| **GO:0045637** | **BP** | **GO:0045637** | **regulation of myeloid cell differentiation** | **8/123** | **210/18723** | **7.48756248954709e-05** | **0.00633634975677922** | **0.0053545923856169** | **NFKBIA/CEBPB/FOS/JUN/PRMT1/HSPA1A/CTNNB1/CA2** | **8** | **1** |
| **GO:1905898** | **BP** | **GO:1905898** | **positive regulation of response to endoplasmic reticulum stress** | **4/123** | **35/18723** | **7.93232841593329e-05** | **0.00650931677283253** | **0.00550075980103317** | **DDIT3/CAV1/HERPUD1/TMEM259** | **4** | **1** |
| **GO:0009408** | **BP** | **GO:0009408** | **response to heat** | **6/123** | **110/18723** | **8.7251358540558e-05** | **0.00694931408611268** | **0.00587258369867409** | **HSPA1A/IER5/HSPA2/HSP90AB1/DNAJB1/CHORDC1** | **6** | **1** |
| **GO:0034605** | **BP** | **GO:0034605** | **cellular response to heat** | **5/123** | **69/18723** | **9.05616421619748e-05** | **0.00700688362784651** | **0.00592123338526716** | **HSPA1A/IER5/HSP90AB1/DNAJB1/CHORDC1** | **5** | **1** |
| **GO:1904294** | **BP** | **GO:1904294** | **positive regulation of ERAD pathway** | **3/123** | **14/18723** | **9.55222341782781e-05** | **0.00718539472652159** | **0.00607208588022154** | **CAV1/HERPUD1/TMEM259** | **3** | **1** |
| **GO:0035967** | **BP** | **GO:0035967** | **cellular response to topologically incorrect protein** | **6/123** | **116/18723** | **0.000117068563554885** | **0.00835680641253833** | **0.0070619984221637** | **DDIT3/HSPA1A/HSPA2/HERPUD1/DNAJB14/DNAJB9** | **6** | **1** |
| **GO:2001234** | **BP** | **GO:2001234** | **negative regulation of apoptotic signaling pathway** | **8/123** | **224/18723** | **0.000117266855124245** | **0.00835680641253833** | **0.0070619984221637** | **IVNS1ABP/HSPB1/SNAI1/HSPA1A/HERPUD1/CTNNB1/IFI6/ITGAV** | **8** | **1** |
| **GO:0022612** | **BP** | **GO:0022612** | **gland morphogenesis** | **6/123** | **118/18723** | **0.000128628919995044** | **0.00893146449606611** | **0.00754761867933131** | **CEBPB/AREG/CAV1/ARG1/MSN/SLC9A3R1** | **6** | **1** |
| **GO:0006857** | **BP** | **GO:0006857** | **oligopeptide transport** | **3/123** | **16/18723** | **0.000145552182590814** | **0.00938465024895057** | **0.00793058759279271** | **CA2/SLC15A1/SLC9A3R1** | **3** | **1** |
| **GO:0060330** | **BP** | **GO:0060330** | **regulation of response to interferon-gamma** | **3/123** | **16/18723** | **0.000145552182590814** | **0.00938465024895057** | **0.00793058759279271** | **SOCS1/ARG1/HSP90AB1** | **3** | **1** |
| **GO:0060334** | **BP** | **GO:0060334** | **regulation of interferon-gamma-mediated signaling pathway** | **3/123** | **16/18723** | **0.000145552182590814** | **0.00938465024895057** | **0.00793058759279271** | **SOCS1/ARG1/HSP90AB1** | **3** | **1** |
| **GO:1903706** | **BP** | **GO:1903706** | **regulation of hemopoiesis** | **10/123** | **367/18723** | **0.0001560690658333** | **0.00982872163433899** | **0.00830585432366205** | **NFKBIA/CEBPB/FOS/JUN/PRMT1/HSPA1A/SOCS1/PCID2/CTNNB1/CA2** | **10** | **1** |
| **GO:0090083** | **BP** | **GO:0090083** | **regulation of inclusion body assembly** | **3/123** | **17/18723** | **0.000175895328642382** | **0.0105849899991904** | **0.00894494606943948** | **HSPA1A/HSPA2/DNAJB1** | **3** | **1** |
| **GO:1900034** | **BP** | **GO:1900034** | **regulation of cellular response to heat** | **3/123** | **17/18723** | **0.000175895328642382** | **0.0105849899991904** | **0.00894494606943948** | **IER5/DNAJB1/CHORDC1** | **3** | **1** |
| **GO:1903573** | **BP** | **GO:1903573** | **negative regulation of response to endoplasmic reticulum stress** | **4/123** | **44/18723** | **0.00019648806753248** | **0.0114778726172926** | **0.00969948498406054** | **HSPA1A/HERPUD1/SVIP/DNAJB9** | **4** | **1** |
| **GO:1903320** | **BP** | **GO:1903320** | **regulation of protein modification by small protein conjugation or removal** | **8/123** | **242/18723** | **0.000199209753697471** | **0.0114778726172926** | **0.00969948498406054** | **EGR1/IVNS1ABP/CAV1/HSPA1A/HERPUD1/CTNNB1/HSP90AB1/OGT** | **8** | **1** |
| **GO:0060326** | **BP** | **GO:0060326** | **cell chemotaxis** | **9/123** | **310/18723** | **0.000210288961961555** | **0.0118638022706644** | **0.010025618493518** | **CXCL2/HBEGF/CXCL1/CXCL3/HSPB1/ACKR2/VAV3/FGFR1/PPIB** | **9** | **1** |
| **GO:0061136** | **BP** | **GO:0061136** | **regulation of proteasomal protein catabolic process** | **7/123** | **187/18723** | **0.000237382208570221** | **0.0131190004246563** | **0.011086335583924** | **CAV1/HSPA1A/HERPUD1/HSP90AB1/SVIP/OGT/TMEM259** | **7** | **1** |
| **GO:0032434** | **BP** | **GO:0032434** | **regulation of proteasomal ubiquitin-dependent protein catabolic process** | **6/123** | **134/18723** | **0.000257315420564883** | **0.0139362031777941** | **0.0117769205117486** | **CAV1/HSPA1A/HERPUD1/HSP90AB1/SVIP/OGT** | **6** | **1** |
| **GO:0019221** | **BP** | **GO:0019221** | **cytokine-mediated signaling pathway** | **11/123** | **472/18723** | **0.000283540734307355** | **0.0147799152012813** | **0.0124899073496018** | **NFKBIA/CXCL2/CXCL1/CXCL3/EGR1/CAV1/HSPA1A/SOCS1/ARG1/HSP90AB1/ACKR2** | **11** | **1** |
| **GO:1903362** | **BP** | **GO:1903362** | **regulation of cellular protein catabolic process** | **8/123** | **255/18723** | **0.000283809302240262** | **0.0147799152012813** | **0.0124899073496018** | **CAV1/HSPA1A/HERPUD1/HSP90AB1/SVIP/OGT/MSN/TMEM259** | **8** | **1** |
| **GO:0009409** | **BP** | **GO:0009409** | **response to cold** | **4/123** | **49/18723** | **0.000299009122152762** | **0.0152776736375411** | **0.0129105428313824** | **NFKBIA/FOS/VGF/HSPA2** | **4** | **1** |
| **GO:0043588** | **BP** | **GO:0043588** | **skin development** | **8/123** | **263/18723** | **0.00034909869687963** | **0.0175066531694451** | **0.0147941630997332** | **SFN/SNAI1/CLDN4/CTNNB1/CSTA/ELOVL1/GRHL3/TGM3** | **8** | **1** |
| **GO:0051591** | **BP** | **GO:0051591** | **response to cAMP** | **5/123** | **93/18723** | **0.000369458410721134** | **0.0178752780874779** | **0.0151056730786663** | **AREG/FOS/JUN/VGF/AKAP9** | **5** | **1** |
| **GO:0042110** | **BP** | **GO:0042110** | **T cell activation** | **11/123** | **487/18723** | **0.0003696512455313** | **0.0178752780874779** | **0.0151056730786663** | **CEBPB/EGR1/CAV1/SOCS1/LGALS7B/ARG1/CTNNB1/RSAD2/HSPH1/MSN/LIG4** | **11** | **1** |
| **GO:0062197** | **BP** | **GO:0062197** | **cellular response to chemical stress** | **9/123** | **337/18723** | **0.000388351675693152** | **0.0184501111890711** | **0.0155914412365081** | **DDIT3/FOS/HSPB1/JUN/CAV1/HSPA1A/ARG1/CTNNB1/RHOB** | **9** | **1** |
| **GO:1903321** | **BP** | **GO:1903321** | **negative regulation of protein modification by small protein conjugation or removal** | **5/123** | **95/18723** | **0.000407620117545214** | **0.0190316427295248** | **0.0160828699735625** | **IVNS1ABP/CAV1/HSPA1A/CTNNB1/OGT** | **5** | **1** |
| **GO:0034620** | **BP** | **GO:0034620** | **cellular response to unfolded protein** | **5/123** | **96/18723** | **0.000427780937822653** | **0.0196344199936228** | **0.0165922526106414** | **DDIT3/HSPA1A/HSPA2/HERPUD1/DNAJB9** | **5** | **1** |
| **GO:0035994** | **BP** | **GO:0035994** | **response to muscle stretch** | **3/123** | **23/18723** | **0.000445107299853152** | **0.0197598453770875** | **0.0166982445190811** | **NFKBIA/FOS/CTNNB1** | **3** | **1** |
| **GO:0051131** | **BP** | **GO:0051131** | **chaperone-mediated protein complex assembly** | **3/123** | **23/18723** | **0.000445107299853152** | **0.0197598453770875** | **0.0166982445190811** | **HSPA1A/HSP90AB1/HOPX** | **3** | **1** |
| **GO:2001243** | **BP** | **GO:2001243** | **negative regulation of intrinsic apoptotic signaling pathway** | **5/123** | **98/18723** | **0.000470350127301591** | **0.0205436797537534** | **0.0173606311842726** | **IVNS1ABP/HSPB1/SNAI1/HSPA1A/HERPUD1** | **5** | **1** |
| **GO:0070841** | **BP** | **GO:0070841** | **inclusion body assembly** | **3/123** | **24/18723** | **0.000506262269316193** | **0.0215792141735847** | **0.0182357193552722** | **HSPA1A/HSPA2/DNAJB1** | **3** | **1** |
| **GO:1903131** | **BP** | **GO:1903131** | **mononuclear cell differentiation** | **10/123** | **426/18723** | **0.000509996199080289** | **0.0215792141735847** | **0.0182357193552722** | **CEBPB/EGR1/JUN/SOCS1/PCID2/CTNNB1/RSAD2/DNAJB9/LIG4/IRF2BP2** | **10** | **1** |
| **GO:0045861** | **BP** | **GO:0045861** | **negative regulation of proteolysis** | **9/123** | **351/18723** | **0.000521164917224697** | **0.0217125322437612** | **0.0183483810533845** | **SFN/PCID2/HERPUD1/HSP90AB1/SVIP/IFI6/UBE2Z/CSTA/OGT** | **9** | **1** |
| **GO:0050891** | **BP** | **GO:0050891** | **multicellular organismal water homeostasis** | **4/123** | **57/18723** | **0.000535361251078766** | **0.0219660343624439** | **0.0185626054201792** | **SFN/CLDN4/ELOVL1/GRHL3** | **4** | **1** |
| **GO:2001244** | **BP** | **GO:2001244** | **positive regulation of intrinsic apoptotic signaling pathway** | **4/123** | **58/18723** | **0.000572120505437538** | **0.0231239153541023** | **0.0195410837206788** | **DDIT3/BBC3/CAV1/SLC9A3R1** | **4** | **1** |
| **GO:0030593** | **BP** | **GO:0030593** | **neutrophil chemotaxis** | **5/123** | **103/18723** | **0.000590720046286157** | **0.0231836215267089** | **0.019591538987431** | **CXCL2/CXCL1/CXCL3/VAV3/PPIB** | **5** | **1** |
| **GO:0045639** | **BP** | **GO:0045639** | **positive regulation of myeloid cell differentiation** | **5/123** | **103/18723** | **0.000590720046286157** | **0.0231836215267089** | **0.019591538987431** | **FOS/JUN/PRMT1/HSPA1A/CA2** | **5** | **1** |
| **GO:1903050** | **BP** | **GO:1903050** | **regulation of proteolysis involved in cellular protein catabolic process** | **7/123** | **221/18723** | **0.000647825783536387** | **0.0250616031688076** | **0.0211785451640316** | **CAV1/HSPA1A/HERPUD1/HSP90AB1/SVIP/OGT/TMEM259** | **7** | **1** |
| **GO:0044403** | **BP** | **GO:0044403** | **biological process involved in symbiotic interaction** | **8/123** | **290/18723** | **0.000665567323260061** | **0.0253853001603978** | **0.0214520883731263** | **JUN/CAV1/HSPA1A/ARG1/HSP90AB1/EFNB2/PPIB/ITGAV** | **8** | **1** |
| **GO:0001701** | **BP** | **GO:0001701** | **in utero embryonic development** | **9/123** | **367/18723** | **0.000716511851499773** | **0.0267532803585951** | **0.0226081129983619** | **YBX1/CEBPB/PRMT1/SNAI1/TENT5C/CTNNB1/RDH10/HOPX/LIG4** | **9** | **1** |
| **GO:0060333** | **BP** | **GO:0060333** | **interferon-gamma-mediated signaling pathway** | **3/123** | **27/18723** | **0.000721192565058139** | **0.0267532803585951** | **0.0226081129983619** | **SOCS1/ARG1/HSP90AB1** | **3** | **1** |
| **GO:2000058** | **BP** | **GO:2000058** | **regulation of ubiquitin-dependent protein catabolic process** | **6/123** | **164/18723** | **0.000752976499925893** | **0.0275548697540448** | **0.0232855037103683** | **CAV1/HSPA1A/HERPUD1/HSP90AB1/SVIP/OGT** | **6** | **1** |
| **GO:0001649** | **BP** | **GO:0001649** | **osteoblast differentiation** | **7/123** | **229/18723** | **0.000798631824076563** | **0.0288359330613244** | **0.0243680783935782** | **CEBPB/AREG/SNAI1/CTNNB1/TOB1/TPM4/FHL2** | **7** | **1** |
| **GO:0030104** | **BP** | **GO:0030104** | **water homeostasis** | **4/123** | **64/18723** | **0.000831232760621492** | **0.0292334846202987** | **0.0247040331044583** | **SFN/CLDN4/ELOVL1/GRHL3** | **4** | **1** |
| **GO:0045670** | **BP** | **GO:0045670** | **regulation of osteoclast differentiation** | **4/123** | **64/18723** | **0.000831232760621492** | **0.0292334846202987** | **0.0247040331044583** | **CEBPB/FOS/CTNNB1/CA2** | **4** | **1** |
| **GO:0038034** | **BP** | **GO:0038034** | **signal transduction in absence of ligand** | **4/123** | **65/18723** | **0.000881282984730539** | **0.030206181422491** | **0.025526019751417** | **HSPA1A/IFI6/FGFR1/ITGAV** | **4** | **1** |
| **GO:0097192** | **BP** | **GO:0097192** | **extrinsic apoptotic signaling pathway in absence of ligand** | **4/123** | **65/18723** | **0.000881282984730539** | **0.030206181422491** | **0.025526019751417** | **HSPA1A/IFI6/FGFR1/ITGAV** | **4** | **1** |
| **GO:0031069** | **BP** | **GO:0031069** | **hair follicle morphogenesis** | **3/123** | **29/18723** | **0.000892353956351284** | **0.030206181422491** | **0.025526019751417** | **SNAI1/CTNNB1/TGM3** | **3** | **1** |
| **GO:0001659** | **BP** | **GO:0001659** | **temperature homeostasis** | **6/123** | **174/18723** | **0.00102402103794561** | **0.0342351724784778** | **0.0289307568095354** | **FABP5/CEBPB/DDIT3/EGR1/CAV1/OGT** | **6** | **1** |
| **GO:0046686** | **BP** | **GO:0046686** | **response to cadmium ion** | **4/123** | **68/18723** | **0.00104414529199819** | **0.0344822615942816** | **0.0291395618074976** | **FOS/JUN/ARG1/SORD** | **4** | **1** |
| **GO:0002761** | **BP** | **GO:0002761** | **regulation of myeloid leukocyte differentiation** | **5/123** | **120/18723** | **0.00117714887421584** | **0.0384062548358612** | **0.0324555694679166** | **CEBPB/FOS/JUN/CTNNB1/CA2** | **5** | **1** |
| **GO:1902235** | **BP** | **GO:1902235** | **regulation of endoplasmic reticulum stress-induced intrinsic apoptotic signaling pathway** | **3/123** | **32/18723** | **0.00119404228637131** | **0.0384936489463514** | **0.0325294226888626** | **DDIT3/HSPA1A/HERPUD1** | **3** | **1** |
| **GO:0071216** | **BP** | **GO:0071216** | **cellular response to biotic stimulus** | **7/123** | **246/18723** | **0.00121108929856155** | **0.0385838802412316** | **0.0326056734993538** | **NFKBIA/CXCL2/CEBPB/DDIT3/CXCL1/CXCL3/ARG1** | **7** | **1** |
| **GO:1990266** | **BP** | **GO:1990266** | **neutrophil migration** | **5/123** | **122/18723** | **0.00126712486929881** | **0.0398996993728045** | **0.0337176189211215** | **CXCL2/CXCL1/CXCL3/VAV3/PPIB** | **5** | **1** |
| **GO:0048730** | **BP** | **GO:0048730** | **epidermis morphogenesis** | **3/123** | **33/18723** | **0.00130718408668568** | **0.0406879828361472** | **0.034383765329155** | **SNAI1/CTNNB1/TGM3** | **3** | **1** |
| **GO:0071621** | **BP** | **GO:0071621** | **granulocyte chemotaxis** | **5/123** | **125/18723** | **0.00141149139695388** | **0.0434354398062626** | **0.0367055298681548** | **CXCL2/CXCL1/CXCL3/VAV3/PPIB** | **5** | **1** |
| **GO:0070972** | **BP** | **GO:0070972** | **protein localization to endoplasmic reticulum** | **4/123** | **74/18723** | **0.00143132010379435** | **0.0435507285514056** | **0.0368029557143574** | **INSIG1/SEC61G/HERPUD1/SSR3** | **4** | **1** |
| **GO:0032435** | **BP** | **GO:0032435** | **negative regulation of proteasomal ubiquitin-dependent protein catabolic process** | **3/123** | **35/18723** | **0.00155318288196497** | **0.0467335471595681** | **0.0394926267297291** | **HSP90AB1/SVIP/OGT** | **3** | **1** |
| **GO:0062012** | **BP** | **GO:0062012** | **regulation of small molecule metabolic process** | **8/123** | **334/18723** | **0.00164434188397824** | **0.0482978607556197** | **0.0408145647526694** | **FABP5/EGR1/INSIG1/CAV1/SNAI1/DDIT4/RDH10/OGT** | **8** | **1** |
| **GO:0007492** | **BP** | **GO:0007492** | **endoderm development** | **4/123** | **77/18723** | **0.00165817357474669** | **0.0482978607556197** | **0.0408145647526694** | **DUSP2/ARC/CTNNB1/ITGAV** | **4** | **1** |
| **GO:0043434** | **BP** | **GO:0043434** | **response to peptide hormone** | **9/123** | **414/18723** | **0.00165867837897808** | **0.0482978607556197** | **0.0408145647526694** | **AREG/EGR1/INSIG1/CAV1/SOCS1/ARG1/VGF/CA2/OGT** | **9** | **1** |
| **GO:0016032** | **BP** | **GO:0016032** | **viral process** | **9/123** | **415/18723** | **0.00168622881386827** | **0.0485777407229286** | **0.0410510799703206** | **JUN/CAV1/HSPA1A/RSAD2/HSP90AB1/EFNB2/PPIB/LIG4/ITGAV** | **9** | **1** |
| **GO:0046683** | **BP** | **GO:0046683** | **response to organophosphorus** | **5/123** | **131/18723** | **0.00173614803583699** | **0.0494893566425954** | **0.0418214496388876** | **AREG/FOS/JUN/VGF/AKAP9** | **5** | **1** |
| **GO:1901654** | **BP** | **GO:1901654** | **response to ketone** | **6/123** | **194/18723** | **0.00178545549047496** | **0.0498999986876658** | **0.0421684665890483** | **FOS/CAV1/CLDN4/DDIT4/ARG1/MSN** | **6** | **1** |
| **GO:0032570** | **BP** | **GO:0032570** | **response to progesterone** | **3/123** | **37/18723** | **0.00182636244861024** | **0.0498999986876658** | **0.0421684665890483** | **FOS/CAV1/CLDN4** | **3** | **1** |
| **GO:0010565** | **BP** | **GO:0010565** | **regulation of cellular ketone metabolic process** | **5/123** | **133/18723** | **0.00185563200614699** | **0.0498999986876658** | **0.0421684665890483** | **FABP5/EGR1/INSIG1/CAV1/RDH10** | **5** | **1** |
| **GO:0036363** | **BP** | **GO:0036363** | **transforming growth factor beta activation** | **2/123** | **10/18723** | **0.00186111516523421** | **0.0498999986876658** | **0.0421684665890483** | **HSP90AB1/ITGAV** | **2** | **1** |
| **GO:0048262** | **BP** | **GO:0048262** | **determination of dorsal/ventral asymmetry** | **2/123** | **10/18723** | **0.00186111516523421** | **0.0498999986876658** | **0.0421684665890483** | **DDIT3/CTNNB1** | **2** | **1** |
| **GO:0070862** | **BP** | **GO:0070862** | **negative regulation of protein exit from endoplasmic reticulum** | **2/123** | **10/18723** | **0.00186111516523421** | **0.0498999986876658** | **0.0421684665890483** | **INSIG1/SVIP** | **2** | **1** |
| **GO:0005925** | **CC** | **GO:0005925** | **focal adhesion** | **14/130** | **418/19550** | **7.716991987366e-07** | **0.000142365211015466** | **0.000133042354570646** | **LAMTOR3/HSPB1/CAV1/KLF11/HSPA1A/TES/CTNNB1/EFNB2/TPM4/MSN/PPIB/FHL2/ITGAV/RHOB** | **14** | **1** |
| **GO:0030055** | **CC** | **GO:0030055** | **cell-substrate junction** | **14/130** | **425/19550** | **9.39704363138388e-07** | **0.000142365211015466** | **0.000133042354570646** | **LAMTOR3/HSPB1/CAV1/KLF11/HSPA1A/TES/CTNNB1/EFNB2/TPM4/MSN/PPIB/FHL2/ITGAV/RHOB** | **14** | **1** |
| **GO:0031528** | **CC** | **GO:0031528** | **microvillus membrane** | **4/130** | **27/19550** | **2.90953767373163e-05** | **0.00293863305046895** | **0.00274619520783793** | **CTNNB1/MSN/ITGAV/SLC9A3R1** | **4** | **1** |
| **GO:0005902** | **CC** | **GO:0005902** | **microvillus** | **5/130** | **91/19550** | **0.000354232709937701** | **0.0268331277777809** | **0.0250759470982215** | **CTNNB1/CA2/MSN/ITGAV/SLC9A3R1** | **5** | **1** |
| **GO:0044183** | **MF** | **GO:0044183** | **protein folding chaperone** | **5/132** | **40/18368** | **9.55145840533539e-06** | **0.00327615023303004** | **0.00294587085554028** | **HSPB1/HSPA1A/HSPA2/HSP90AB1/DNAJB1** | **5** | **1** |
| **GO:0031072** | **MF** | **GO:0031072** | **heat shock protein binding** | **7/132** | **129/18368** | **4.07411861026534e-05** | **0.00656143485369034** | **0.00589995523133733** | **HSPA1A/HSPA2/DNAJB14/HSP90AB1/DNAJB1/DNAJB9/CHORDC1** | **7** | **1** |
| **GO:1990226** | **MF** | **GO:1990226** | **histone methyltransferase binding** | **3/132** | **11/18368** | **5.73886430351925e-05** | **0.00656143485369034** | **0.00589995523133733** | **NOP56/CTNNB1/HSP90AB1** | **3** | **1** |
| **GO:0097718** | **MF** | **GO:0097718** | **disordered domain specific binding** | **4/132** | **36/18368** | **0.000125587284267644** | **0.0107691096259504** | **0.00968344060274199** | **HSPA1A/HSPA2/CTNNB1/HSP90AB1** | **4** | **1** |
| **GO:0045236** | **MF** | **GO:0045236** | **CXCR chemokine receptor binding** | **3/132** | **18/18368** | **0.000273545479227931** | **0.018765219875036** | **0.0168734369292176** | **CXCL2/CXCL1/CXCL3** | **3** | **1** |
| **GO:00435881** | **BP** | **GO:0043588** | **skin development** | **30/431** | **263/18723** | **5.28579461944965e-13** | **2.27500600421113e-09** | **1.78437298363948e-09** | **EREG/SPINK5/TNF/ZFP36/CLDN1/FLG/OVOL1/EPHA2/IRF6/GRHL1/CASP3/CASP14/CLIC4/CDSN/FLG2/KRT2/DHCR24/GJB3/ASH1L/ST14/STK4/KLK5/EXPH5/TGM1/TXNIP/FOXQ1/IVL/PPL/GBA/BCR** | **30** | **2** |
| **GO:0030216** | **BP** | **GO:0030216** | **keratinocyte differentiation** | **20/431** | **139/18723** | **6.4520088003583e-11** | **1.3884722938371e-07** | **1.08903116961837e-07** | **EREG/ZFP36/FLG/EPHA2/IRF6/GRHL1/CASP3/CASP14/CLIC4/CDSN/KRT2/ST14/STK4/KLK5/EXPH5/TGM1/TXNIP/IVL/PPL/BCR** | **20** | **2** |
| **GO:0032496** | **BP** | **GO:0032496** | **response to lipopolysaccharide** | **30/431** | **343/18723** | **4.25524398866675e-10** | **6.1048567090739e-07** | **4.78826928829974e-07** | **ZC3H12A/CXCL8/NFKB1/TNF/TNFAIP3/SOD2/ADM/NR1D1/ZFP36/ICAM1/NFKB2/NR4A1/CLDN1/DUSP10/CD55/PELI1/TNIP1/IRAK2/GCH1/IL1A/IL36G/CASP3/FER/EDN1/XBP1/GJB2/PLCG2/JUND/IL18/IL36RN** | **30** | **2** |
| **GO:0002237** | **BP** | **GO:0002237** | **response to molecule of bacterial origin** | **30/431** | **363/18723** | **1.64372093036736e-09** | **1.47195085681033e-06** | **1.15450655395e-06** | **ZC3H12A/CXCL8/NFKB1/TNF/TNFAIP3/SOD2/ADM/NR1D1/ZFP36/ICAM1/NFKB2/NR4A1/CLDN1/DUSP10/CD55/PELI1/TNIP1/IRAK2/GCH1/IL1A/IL36G/CASP3/FER/EDN1/XBP1/GJB2/PLCG2/JUND/IL18/IL36RN** | **30** | **2** |
| **GO:0009913** | **BP** | **GO:0009913** | **epidermal cell differentiation** | **22/431** | **202/18723** | **1.7099800845845e-09** | **1.47195085681033e-06** | **1.15450655395e-06** | **EREG/SPINK5/ZFP36/FLG/OVOL1/EPHA2/IRF6/GRHL1/CASP3/CASP14/CLIC4/CDSN/KRT2/ST14/STK4/KLK5/EXPH5/TGM1/TXNIP/IVL/PPL/BCR** | **22** | **2** |
| **GO:00085441** | **BP** | **GO:0008544** | **epidermis development** | **27/431** | **324/18723** | **9.19417105205889e-09** | **6.59528536801025e-06** | **5.17293097613208e-06** | **EREG/SPINK5/TNF/ZFP36/FLG/OVOL1/EPHA2/LAMB3/IRF6/GRHL1/CASP3/CASP14/CLIC4/CDSN/FLG2/KRT2/ST14/STK4/KLK5/EXPH5/TGM1/TXNIP/FOXQ1/IVL/PPL/BCR/COL17A1** | **27** | **2** |
| **GO:0038066** | **BP** | **GO:0038066** | **p38MAPK cascade** | **10/431** | **55/18723** | **4.36346178629173e-07** | **0.000268290564688566** | **0.000210430405242671** | **ZC3H12A/ZFP36/GADD45A/DUSP10/MAP2K3/PER1/DUSP1/BMP2/EZR/VEGFA** | **10** | **2** |
| **GO:0022407** | **BP** | **GO:0022407** | **regulation of cell-cell adhesion** | **29/431** | **448/18723** | **6.1615720667149e-07** | **0.000331492577189262** | **0.000260002126552035** | **ZC3H12A/IRF1/TNF/SDC4/ICAM1/CD83/DUSP10/CD55/PRKCD/PELI1/NRARP/IL1A/PIEZO1/NFKBIZ/BMP2/HLA-A/CASP3/PRNP/GPNMB/CDSN/XBP1/ZP3/VEGFA/CD44/IL1RN/MAP3K8/IL18/SWAP70/EGR3** | **29** | **2** |
| **GO:0000302** | **BP** | **GO:0000302** | **response to reactive oxygen species** | **19/431** | **222/18723** | **9.95725856523049e-07** | **0.000476178231830578** | **0.000373484540569523** | **TNFAIP3/SOD2/SETX/KDM6B/PRKCD/DUSP1/PLK3/GCH1/CASP3/FER/EDN1/SMPD3/PLEKHA1/HIF1A/STK26/PPIF/HMOX1/KLF2/TXNIP** | **19** | **2** |
| **GO:00712161** | **BP** | **GO:0071216** | **cellular response to biotic stimulus** | **20/431** | **246/18723** | **1.16249547558015e-06** | **0.000500338052689695** | **0.000392433998966898** | **ZC3H12A/CXCL8/NFKB1/TNF/TNFAIP3/NR1D1/ZFP36/ICAM1/CD55/TNIP1/IRAK2/IL1A/IL36G/XBP1/HSPA5/BID/PLCG2/TXNIP/IL18/IL36RN** | **20** | **2** |
| **GO:0006979** | **BP** | **GO:0006979** | **response to oxidative stress** | **28/431** | **446/18723** | **1.75991972456394e-06** | **0.000600158614258298** | **0.000470727028939141** | **ZC3H12A/TNFAIP3/SOD2/SETX/KDM6B/PRKCD/DUSP1/PLK3/GCH1/CPEB2/PRDX6/MCL1/CASP3/PRNP/FER/EDN1/DHCR24/SMPD3/PLEKHA1/HIF1A/STK26/RCAN1/GJB2/PPIF/HMOX1/HSPA1B/KLF2/TXNIP** | **28** | **2** |
| **GO:0034612** | **BP** | **GO:0034612** | **response to tumor necrosis factor** | **20/431** | **253/18723** | **1.79787449316011e-06** | **0.000600158614258298** | **0.000470727028939141** | **ZC3H12A/CCL20/CXCL8/NFKB1/TNF/TNFAIP3/NR1D1/ZFP36/ICAM1/CLDN1/YBX3/GCH1/CASP3/ZFP36L2/EDN1/BIRC3/SMPD3/HSPA1B/KLF2/GBA** | **20** | **2** |
| **GO:0007159** | **BP** | **GO:0007159** | **leukocyte cell-cell adhesion** | **25/431** | **371/18723** | **1.81274674380991e-06** | **0.000600158614258298** | **0.000470727028939141** | **ZC3H12A/IRF1/TNF/SDC4/ICAM1/CD83/DUSP10/CD55/PELI1/TNIP1/NRARP/IL1A/NFKBIZ/HLA-A/CASP3/EZR/PRNP/GPNMB/XBP1/ZP3/CD44/STK10/MAP3K8/IL18/EGR3** | **25** | **2** |
| **GO:00421101** | **BP** | **GO:0042110** | **T cell activation** | **29/431** | **487/18723** | **3.27497178884445e-06** | **0.00100681989851332** | **0.000789686806528132** | **ZC3H12A/IRF1/SPINK5/SDC4/ICAM1/CD83/DUSP10/CD55/BCL3/PELI1/CXADR/NRARP/IL1A/NFKBIZ/HLA-A/CASP3/PRNP/ZFP36L2/GPNMB/STAT3/XBP1/ZP3/CD44/IL6R/MAFB/MAP3K8/IL18/GBA/EGR3** | **29** | **2** |
| **GO:00621971** | **BP** | **GO:0062197** | **cellular response to chemical stress** | **23/431** | **337/18723** | **3.80107131997371e-06** | **0.00108707176163896** | **0.000852631368513046** | **ZC3H12A/TNFAIP3/SOD2/SETX/KDM6B/YBX3/PRKCD/AKR1B1/GCH1/CPEB2/MCL1/CASP3/FER/SMPD3/PLEKHA1/HIF1A/STK26/GJB2/PPIF/HMOX1/HSPA1B/KLF2/SLC2A1** | **23** | **2** |
| **GO:0048545** | **BP** | **GO:0048545** | **response to steroid hormone** | **23/431** | **339/18723** | **4.19436818822727e-06** | **0.00108707176163896** | **0.000852631368513046** | **TNF/ADM/NR1D1/ZFP36/ICAM1/CLDN1/PER1/DUSP1/ATP2B1/CASP3/FBXO32/ZFP36L2/PMEPA1/EDN1/NEDD4/GJB2/IL1RN/CALCOCO1/SMARCA4/PGRMC2/TXNIP/ZBTB7A/GBA** | **23** | **2** |
| **GO:00160321** | **BP** | **GO:0016032** | **viral process** | **26/431** | **415/18723** | **4.29373140052563e-06** | **0.00108707176163896** | **0.000852631368513046** | **ZC3H12A/CXCL8/TNF/ZFP36/ICAM1/CLDN1/CD55/SLC3A2/CXADR/EPHA2/TNIP1/TRIM28/NECTIN1/ISG15/NECTIN4/LDLR/SRPK1/IGF2R/TRIM25/EIF3B/NEDD4/IDE/PCBP1/HSPA1B/SMARCA4/OASL** | **26** | **2** |
| **GO:0019058** | **BP** | **GO:0019058** | **viral life cycle** | **22/431** | **317/18723** | **4.72199892561094e-06** | **0.0010995915683641** | **0.000862451124961763** | **ZC3H12A/CXCL8/TNF/ICAM1/CLDN1/CD55/SLC3A2/CXADR/EPHA2/TNIP1/TRIM28/NECTIN1/ISG15/NECTIN4/LDLR/SRPK1/TRIM25/NEDD4/IDE/PCBP1/HSPA1B/OASL** | **22** | **2** |
| **GO:0045765** | **BP** | **GO:0045765** | **regulation of angiogenesis** | **23/431** | **342/18723** | **4.85414493469281e-06** | **0.0010995915683641** | **0.000862451124961763** | **ZC3H12A/EFNA1/CXCL8/SPINK5/TNF/TNFAIP3/ADM/GADD45A/EPHA2/IL1A/ITGB8/GPNMB/NINJ1/STAT3/EMP2/XBP1/HK2/CEMIP2/HIF1A/VEGFA/HMOX1/KLF2/FGF18** | **23** | **2** |
| **GO:0071356** | **BP** | **GO:0071356** | **cellular response to tumor necrosis factor** | **18/431** | **229/18723** | **6.37796304788884e-06** | **0.00126476303965389** | **0.000992001337353262** | **ZC3H12A/CCL20/CXCL8/NFKB1/TNF/TNFAIP3/NR1D1/ZFP36/ICAM1/CLDN1/YBX3/ZFP36L2/EDN1/BIRC3/SMPD3/HSPA1B/KLF2/GBA** | **18** | **2** |
| **GO:0010038** | **BP** | **GO:0010038** | **response to metal ion** | **24/431** | **373/18723** | **6.42542563481434e-06** | **0.00126476303965389** | **0.000992001337353262** | **SOD2/JUNB/ICAM1/CLDN1/ARL13B/DUSP1/AQP9/IL1A/CASP3/PRNP/CLIC4/SLC11A2/EDN1/SMPD3/HIF1A/HSPA5/NEDD4/PPIF/HMOX1/TFAP2A/PLCG2/JUND/TXNIP/SLC30A1** | **24** | **2** |
| **GO:1901342** | **BP** | **GO:1901342** | **regulation of vasculature development** | **23/431** | **348/18723** | **6.46486683837954e-06** | **0.00126476303965389** | **0.000992001337353262** | **ZC3H12A/EFNA1/CXCL8/SPINK5/TNF/TNFAIP3/ADM/GADD45A/EPHA2/IL1A/ITGB8/GPNMB/NINJ1/STAT3/EMP2/XBP1/HK2/CEMIP2/HIF1A/VEGFA/HMOX1/KLF2/FGF18** | **23** | **2** |
| **GO:0042542** | **BP** | **GO:0042542** | **response to hydrogen peroxide** | **14/431** | **146/18723** | **7.2331078653126e-06** | **0.00131175783950762** | **0.00102886113072318** | **TNFAIP3/SOD2/SETX/KDM6B/PRKCD/DUSP1/CASP3/SMPD3/PLEKHA1/STK26/PPIF/HMOX1/KLF2/TXNIP** | **14** | **2** |
| **GO:0071222** | **BP** | **GO:0071222** | **cellular response to lipopolysaccharide** | **17/431** | **209/18723** | **7.31463479279344e-06** | **0.00131175783950762** | **0.00102886113072318** | **ZC3H12A/CXCL8/NFKB1/TNF/TNFAIP3/NR1D1/ZFP36/ICAM1/CD55/TNIP1/IRAK2/IL1A/IL36G/XBP1/PLCG2/IL18/IL36RN** | **17** | **2** |
| **GO:0051384** | **BP** | **GO:0051384** | **response to glucocorticoid** | **14/431** | **148/18723** | **8.46920084865182e-06** | **0.0014580576181039** | **0.00114360956301585** | **TNF/ADM/ZFP36/ICAM1/CLDN1/DUSP1/ATP2B1/CASP3/FBXO32/ZFP36L2/EDN1/GJB2/IL1RN/GBA** | **14** | **2** |
| **GO:1900744** | **BP** | **GO:1900744** | **regulation of p38MAPK cascade** | **8/431** | **47/18723** | **1.05765481348083e-05** | **0.0017150115559505** | **0.0013451482244016** | **ZC3H12A/GADD45A/DUSP10/PER1/DUSP1/BMP2/EZR/VEGFA** | **8** | **2** |
| **GO:0050673** | **BP** | **GO:0050673** | **epithelial cell proliferation** | **26/431** | **437/18723** | **1.0758669147459e-05** | **0.0017150115559505** | **0.0013451482244016** | **EREG/TNF/TNFAIP3/NR1D1/ZFP36/NR4A1/CLDN1/DUSP10/EPHA2/CDKN2B/NRARP/IRF6/BMP2/NUPR1/STAT3/B4GALT1/XBP1/KRT2/DLX5/HIF1A/MTSS1/VEGFA/HMOX1/TGM1/EPPK1/EGR3** | **26** | **2** |
| **GO:1903037** | **BP** | **GO:1903037** | **regulation of leukocyte cell-cell adhesion** | **22/431** | **336/18723** | **1.18787066951184e-05** | **0.0017997383423289** | **0.00141160263741166** | **ZC3H12A/IRF1/TNF/SDC4/ICAM1/CD83/DUSP10/CD55/PELI1/NRARP/IL1A/NFKBIZ/HLA-A/CASP3/PRNP/GPNMB/XBP1/ZP3/CD44/MAP3K8/IL18/EGR3** | **22** | **2** |
| **GO:0051090** | **BP** | **GO:0051090** | **regulation of DNA-binding transcription factor activity** | **26/431** | **440/18723** | **1.21264897601157e-05** | **0.0017997383423289** | **0.00141160263741166** | **ZC3H12A/BHLHE40/TNF/TNFAIP3/ICAM1/NFKBIE/BCL3/PELI1/IRAK2/CRTC2/BMP2/PIM1/NUPR1/PRNP/FER/STAT3/EDN1/SGK1/TRIM25/VEGFA/HMOX1/HSPA1B/PLCG2/SMARCA4/ZBTB7A/IL18** | **26** | **2** |
| **GO:0002064** | **BP** | **GO:0002064** | **epithelial cell development** | **17/431** | **220/18723** | **1.43728624181879e-05** | **0.00206202666159602** | **0.00161732525526767** | **TNF/ICAM1/CLDN1/POF1B/AKR1B1/EPHA2/EZR/CLIC4/CDSN/B4GALT1/FEM1B/KRT2/HIF1A/ST14/VEGFA/EXPH5/SIPA1L3** | **17** | **2** |
| **GO:0071219** | **BP** | **GO:0071219** | **cellular response to molecule of bacterial origin** | **17/431** | **221/18723** | **1.52473722784943e-05** | **0.0021169254931174** | **0.00166038447868018** | **ZC3H12A/CXCL8/NFKB1/TNF/TNFAIP3/NR1D1/ZFP36/ICAM1/CD55/TNIP1/IRAK2/IL1A/IL36G/XBP1/PLCG2/IL18/IL36RN** | **17** | **2** |
| **GO:0045444** | **BP** | **GO:0045444** | **fat cell differentiation** | **17/431** | **229/18723** | **2.41371197065743e-05** | **0.00324644260053424** | **0.00254630733220341** | **ZC3H12A/TNF/NR1D1/ZFP36/NR4A1/DUSP10/NOC3L/LAMB3/BMP2/PIM1/ZFP36L2/XBP1/STK4/STEAP4/MAFB/ZBTB7A/DIO2** | **17** | **2** |
| **GO:0002683** | **BP** | **GO:0002683** | **negative regulation of immune system process** | **25/431** | **434/18723** | **2.72684961958929e-05** | **0.00349687633805045** | **0.00274273195463897** | **ZC3H12A/IRF1/SPINK5/TNF/TNFAIP3/NR1D1/SDC4/DUSP10/CD55/DUSP1/PELI1/NRARP/AHR/HLA-A/CASP3/EZR/PRNP/GPNMB/FER/ISG15/LDLR/HLA-F/YTHDF3/HMOX1/MAFB** | **25** | **2** |
| **GO:0050678** | **BP** | **GO:0050678** | **regulation of epithelial cell proliferation** | **23/431** | **381/18723** | **2.76240231165696e-05** | **0.00349687633805045** | **0.00274273195463897** | **EREG/TNF/TNFAIP3/NR1D1/ZFP36/NR4A1/CLDN1/DUSP10/CDKN2B/NRARP/BMP2/NUPR1/STAT3/B4GALT1/XBP1/DLX5/HIF1A/MTSS1/VEGFA/HMOX1/TGM1/EPPK1/EGR3** | **23** | **2** |
| **GO:0007249** | **BP** | **GO:0007249** | **I-kappaB kinase/NF-kappaB signaling** | **19/431** | **281/18723** | **3.00111321678237e-05** | **0.00369051179572323** | **0.00289460754472814** | **ZC3H12A/REL/TNF/TNFAIP3/NR1D1/BCL3/PER1/PELI1/SQSTM1/TNIP1/IRAK2/UBE2I/TRAF4/DDX21/BIRC3/TRIM25/ASH1L/HMOX1/PLCG2** | **19** | **2** |
| **GO:0001666** | **BP** | **GO:0001666** | **response to hypoxia** | **20/431** | **307/18723** | **3.16993555225885e-05** | **0.00378983406025614** | **0.00297250974154799** | **SOD2/ADM/ICAM1/PLK3/CPEB2/BMP2/CASP3/MALAT1/BACH1/ITPR1/SLC11A2/ATP1B1/EDN1/EGLN3/HK2/HSP90B1/HIF1A/VEGFA/HMOX1/SLC2A1** | **20** | **2** |
| **GO:0031960** | **BP** | **GO:0031960** | **response to corticosteroid** | **14/431** | **167/18723** | **3.33130844232129e-05** | **0.00387512203668941** | **0.00303940431707663** | **TNF/ADM/ZFP36/ICAM1/CLDN1/DUSP1/ATP2B1/CASP3/FBXO32/ZFP36L2/EDN1/GJB2/IL1RN/GBA** | **14** | **2** |
| **GO:0048016** | **BP** | **GO:0048016** | **inositol phosphate-mediated signaling** | **8/431** | **55/18723** | **3.48699499713176e-05** | **0.0039419069910549** | **0.00309178627477819** | **TNF/NFATC1/PRNP/ITPR1/EDN1/RCAN1/NFATC2/PLCG2** | **8** | **2** |
| **GO:00709971** | **BP** | **GO:0070997** | **neuron death** | **22/431** | **361/18723** | **3.57189527535179e-05** | **0.0039419069910549** | **0.00309178627477819** | **BTG2/REL/TNF/SOD2/MCL1/CASP3/NUPR1/PRNP/GPNMB/STAT3/HLA-F/EGLN3/DHCR24/HIF1A/HSPA5/KDM2B/BID/HMOX1/TFAP2A/FOXQ1/RRAS2/GBA** | **22** | **2** |
| **GO:0034599** | **BP** | **GO:0034599** | **cellular response to oxidative stress** | **19/431** | **288/18723** | **4.19869634615403e-05** | **0.00451779726846173** | **0.00354347873213578** | **ZC3H12A/TNFAIP3/SOD2/SETX/KDM6B/PRKCD/GCH1/CPEB2/MCL1/FER/SMPD3/PLEKHA1/HIF1A/STK26/GJB2/PPIF/HMOX1/HSPA1B/KLF2** | **19** | **2** |
| **GO:0034101** | **BP** | **GO:0034101** | **erythrocyte homeostasis** | **12/431** | **129/18723** | **4.38136774252512e-05** | **0.00458807282422164** | **0.0035985985001171** | **ZFP36/CASP3/SLC11A2/STAT3/ISG15/HIF1A/VEGFA/HMOX1/HSPA1B/KLF2/MAFB/ZBTB7A** | **12** | **2** |
| **GO:0001667** | **BP** | **GO:0001667** | **ameboidal-type cell migration** | **26/431** | **475/18723** | **4.47720861099695e-05** | **0.00458807282422164** | **0.0035985985001171** | **ZC3H12A/EFNA1/TNF/SDC4/NR4A1/AMOTL2/GADD45A/DUSP10/MAP2K3/EPHA2/FER/EDN1/EMP2/KRT2/HIF1A/YTHDF3/VEGFA/HMOX1/KANK1/PLCG2/MACF1/FGF18/SEMA3C/EPPK1/RCC2/EGR3** | **26** | **2** |
| **GO:0044409** | **BP** | **GO:0044409** | **entry into host** | **13/431** | **151/18723** | **4.80178433151965e-05** | **0.00480625110764199** | **0.0037697239537781** | **CXCL8/ICAM1/CLDN1/CD55/SLC3A2/CXADR/EPHA2/NECTIN1/NECTIN4/LDLR/TRIM25/IDE/HSPA1B** | **13** | **2** |
| **GO:19012141** | **BP** | **GO:1901214** | **regulation of neuron death** | **20/431** | **319/18723** | **5.43178776071021e-05** | **0.00531327602774926** | **0.00416740271497551** | **BTG2/REL/TNF/SOD2/MCL1/CASP3/NUPR1/PRNP/GPNMB/STAT3/HLA-F/EGLN3/DHCR24/HIF1A/KDM2B/HMOX1/TFAP2A/FOXQ1/RRAS2/GBA** | **20** | **2** |
| **GO:0052126** | **BP** | **GO:0052126** | **movement in host environment** | **14/431** | **175/18723** | **5.57543283410791e-05** | **0.00533259175955566** | **0.00418255277169218** | **CXCL8/ICAM1/CLDN1/CD55/SLC3A2/CXADR/EPHA2/TRIM28/NECTIN1/NECTIN4/LDLR/TRIM25/IDE/HSPA1B** | **14** | **2** |
| **GO:0071347** | **BP** | **GO:0071347** | **cellular response to interleukin-1** | **11/431** | **113/18723** | **5.98925219232433e-05** | **0.00560385683386172** | **0.00439531619697577** | **ZC3H12A/CCL20/CXCL8/NFKB1/NR1D1/ICAM1/IRAK2/EDN1/HIF1A/IL1RN/KLF2** | **11** | **2** |
| **GO:0036293** | **BP** | **GO:0036293** | **response to decreased oxygen levels** | **20/431** | **322/18723** | **6.18502106278611e-05** | **0.00566390013919818** | **0.00444241042516351** | **SOD2/ADM/ICAM1/PLK3/CPEB2/BMP2/CASP3/MALAT1/BACH1/ITPR1/SLC11A2/ATP1B1/EDN1/EGLN3/HK2/HSP90B1/HIF1A/VEGFA/HMOX1/SLC2A1** | **20** | **2** |
| **GO:0030212** | **BP** | **GO:0030212** | **hyaluronan metabolic process** | **6/431** | **31/18723** | **6.49241520711915e-05** | **0.0058215323023835** | **0.00456604727395419** | **NFKB1/PIM1/CEMIP2/SMPD3/CD44/CEMIP** | **6** | **2** |
| **GO:0043122** | **BP** | **GO:0043122** | **regulation of I-kappaB kinase/NF-kappaB signaling** | **17/431** | **249/18723** | **6.92772801750172e-05** | **0.00608509007904641** | **0.00477276557510806** | **ZC3H12A/REL/TNF/TNFAIP3/NR1D1/PER1/PELI1/SQSTM1/TNIP1/UBE2I/TRAF4/DDX21/BIRC3/TRIM25/ASH1L/HMOX1/PLCG2** | **17** | **2** |
| **GO:0071243** | **BP** | **GO:0071243** | **cellular response to arsenic-containing substance** | **5/431** | **20/18723** | **7.35853706239255e-05** | **0.00633422870330751** | **0.00496817439138798** | **ZC3H12A/SLC38A2/CPEB2/PPIF/HMOX1** | **5** | **2** |
| **GO:0051701** | **BP** | **GO:0051701** | **biological process involved in interaction with host** | **15/431** | **203/18723** | **7.5933112922585e-05** | **0.00640815917683933** | **0.00502616084917915** | **CXCL8/ICAM1/CLDN1/CD55/SLC3A2/CXADR/EPHA2/TNIP1/TRIM28/NECTIN1/NECTIN4/LDLR/TRIM25/IDE/HSPA1B** | **15** | **2** |
| **GO:0071383** | **BP** | **GO:0071383** | **cellular response to steroid hormone stimulus** | **15/431** | **204/18723** | **8.02691422821013e-05** | **0.00658489594110193** | **0.00516478215689539** | **NR1D1/ZFP36/ICAM1/PER1/ATP2B1/FBXO32/ZFP36L2/PMEPA1/EDN1/NEDD4/GJB2/CALCOCO1/SMARCA4/PGRMC2/ZBTB7A** | **15** | **2** |
| **GO:0050863** | **BP** | **GO:0050863** | **regulation of T cell activation** | **20/431** | **329/18723** | **8.31497802360118e-05** | **0.00658489594110193** | **0.00516478215689539** | **ZC3H12A/IRF1/SPINK5/SDC4/CD83/DUSP10/CD55/PELI1/NRARP/IL1A/NFKBIZ/HLA-A/CASP3/PRNP/GPNMB/XBP1/ZP3/MAP3K8/IL18/EGR3** | **20** | **2** |
| **GO:0032623** | **BP** | **GO:0032623** | **interleukin-2 production** | **8/431** | **62/18723** | **8.41471367938211e-05** | **0.00658489594110193** | **0.00516478215689539** | **TNFAIP3/ZFP36/CD83/IL1A/EZR/PRNP/PLCG2/NAV3** | **8** | **2** |
| **GO:0032663** | **BP** | **GO:0032663** | **regulation of interleukin-2 production** | **8/431** | **62/18723** | **8.41471367938211e-05** | **0.00658489594110193** | **0.00516478215689539** | **TNFAIP3/ZFP36/CD83/IL1A/EZR/PRNP/PLCG2/NAV3** | **8** | **2** |
| **GO:0001819** | **BP** | **GO:0001819** | **positive regulation of cytokine production** | **25/431** | **467/18723** | **8.92127445679543e-05** | **0.00685663665393706** | **0.00537791864341033** | **EREG/IRF1/TNF/CD83/CD55/BCL3/PELI1/SERPINB7/IL1A/HLA-A/DDX21/STAT3/G3BP1/ISG15/XBP1/HLA-F/HIF1A/ZP3/NLRP10/HMOX1/IL6R/HSPA1B/PLCG2/SLC7A5/IL18** | **25** | **2** |
| **GO:00436181** | **BP** | **GO:0043618** | **regulation of transcription from RNA polymerase II promoter in response to stress** | **7/431** | **47/18723** | **9.26174367965804e-05** | **0.00699342891179793** | **0.00548520996872823** | **BACH1/HIF1A/HSPA5/NEDD4/VEGFA/HMOX1/KLF2** | **7** | **2** |
| **GO:0030217** | **BP** | **GO:0030217** | **T cell differentiation** | **17/431** | **257/18723** | **0.000102105792694114** | **0.00755571096644388** | **0.00592622898390372** | **ZC3H12A/IRF1/SPINK5/CD83/DUSP10/BCL3/NRARP/IL1A/NFKBIZ/ZFP36L2/STAT3/XBP1/IL6R/MAFB/IL18/GBA/EGR3** | **17** | **2** |
| **GO:0030218** | **BP** | **GO:0030218** | **erythrocyte differentiation** | **11/431** | **120/18723** | **0.000103575034158966** | **0.00755571096644388** | **0.00592622898390372** | **ZFP36/CASP3/SLC11A2/STAT3/ISG15/HIF1A/VEGFA/HSPA1B/KLF2/MAFB/ZBTB7A** | **11** | **2** |
| **GO:0050866** | **BP** | **GO:0050866** | **negative regulation of cell activation** | **15/431** | **210/18723** | **0.000111121512048177** | **0.00796760957281588** | **0.00624929659069177** | **ZC3H12A/IRF1/TNFAIP3/NR1D1/SDC4/PRKCD/PELI1/NRARP/CASP3/PRNP/GPNMB/FER/LDLR/HLA-F/HMOX1** | **15** | **2** |
| **GO:0002695** | **BP** | **GO:0002695** | **negative regulation of leukocyte activation** | **14/431** | **187/18723** | **0.000113893116830104** | **0.00796760957281588** | **0.00624929659069177** | **ZC3H12A/IRF1/TNFAIP3/NR1D1/SDC4/PELI1/NRARP/CASP3/PRNP/GPNMB/FER/LDLR/HLA-F/HMOX1** | **14** | **2** |
| **GO:0032635** | **BP** | **GO:0032635** | **interleukin-6 production** | **13/431** | **165/18723** | **0.000119176863467234** | **0.00796760957281588** | **0.00624929659069177** | **ZC3H12A/EREG/TNF/TNFAIP3/IL1A/STAT3/XBP1/NLRP10/IL6R/KLF2/PLCG2/IL36RN/GBA** | **13** | **2** |
| **GO:0032675** | **BP** | **GO:0032675** | **regulation of interleukin-6 production** | **13/431** | **165/18723** | **0.000119176863467234** | **0.00796760957281588** | **0.00624929659069177** | **ZC3H12A/EREG/TNF/TNFAIP3/IL1A/STAT3/XBP1/NLRP10/IL6R/KLF2/PLCG2/IL36RN/GBA** | **13** | **2** |
| **GO:0060965** | **BP** | **GO:0060965** | **negative regulation of gene silencing by miRNA** | **5/431** | **22/18723** | **0.000120328676169385** | **0.00796760957281588** | **0.00624929659069177** | **ZC3H12A/TNF/KCNQ1OT1/NEAT1/STAT3** | **5** | **2** |
| **GO:1901522** | **BP** | **GO:1901522** | **positive regulation of transcription from RNA polymerase II promoter involved in cellular response to chemical stimulus** | **5/431** | **22/18723** | **0.000120328676169385** | **0.00796760957281588** | **0.00624929659069177** | **BMP2/XBP1/DLX5/HIF1A/VEGFA** | **5** | **2** |
| **GO:0046718** | **BP** | **GO:0046718** | **viral entry into host cell** | **12/431** | **144/18723** | **0.000127373647070946** | **0.00830630571202048** | **0.00651494874252829** | **ICAM1/CLDN1/CD55/SLC3A2/CXADR/EPHA2/NECTIN1/NECTIN4/LDLR/TRIM25/IDE/HSPA1B** | **12** | **2** |
| **GO:0042060** | **BP** | **GO:0042060** | **wound healing** | **23/431** | **422/18723** | **0.000130468135865145** | **0.00836372676096379** | **0.00655998623615997** | **EREG/TNF/TNFAIP3/SDC4/CLDN1/PRKCD/IL1A/PHLDB2/CASP3/EDN1/B4GALT1/XBP1/HMGCR/HIF1A/VEGFA/CD44/HMOX1/KANK1/PLCG2/MACF1/SERPINB2/EPPK1/PPL** | **23** | **2** |
| **GO:00971931** | **BP** | **GO:0097193** | **intrinsic apoptotic signaling pathway** | **18/431** | **288/18723** | **0.000132140664439019** | **0.00836372676096379** | **0.00655998623615997** | **TNF/SOD2/YBX3/PRKCD/BCL3/EPHA2/MCL1/CASP3/NUPR1/ITPR1/XBP1/HIF1A/FNIP2/BID/PPIF/CD44/HMOX1/CHAC1** | **18** | **2** |
| **GO:0048608** | **BP** | **GO:0048608** | **reproductive structure development** | **23/431** | **424/18723** | **0.000139857430382433** | **0.00871513069497489** | **0.00683560559058513** | **EREG/ADM/JUNB/ICAM1/YBX3/TRIM28/CASP3/ITGB8/NUPR1/NRIP1/HMGCS1/FEM1B/DHCR24/PLEKHA1/HIF1A/HSPA5/GJB3/ASH1L/ST14/ZP3/STK4/GJB2/VEGFA** | **23** | **2** |
| **GO:00444031** | **BP** | **GO:0044403** | **biological process involved in symbiotic interaction** | **18/431** | **290/18723** | **0.000144075020145491** | **0.00871513069497489** | **0.00683560559058513** | **ZC3H12A/CXCL8/ICAM1/CLDN1/CD55/SLC3A2/CXADR/EPHA2/TNIP1/TRIM28/NECTIN1/NECTIN4/LDLR/IGF2R/TRIM25/IDE/HSPA1B/SMARCA4** | **18** | **2** |
| **GO:0031669** | **BP** | **GO:0031669** | **cellular response to nutrient levels** | **15/431** | **215/18723** | **0.000144264397619229** | **0.00871513069497489** | **0.00683560559058513** | **ZC3H12A/MFSD2A/KLF10/ICAM1/SLC38A2/CDKN2B/ATP2B1/PIM1/XBP1/STK26/HSPA5/HMOX1/SLC2A1/GBA/TNRC6A** | **15** | **2** |
| **GO:0030522** | **BP** | **GO:0030522** | **intracellular receptor signaling pathway** | **17/431** | **265/18723** | **0.000147882133264848** | **0.00871513069497489** | **0.00683560559058513** | **TNFAIP3/NR1D1/NR4A1/PER1/BMP2/AHR/PIM1/PMEPA1/STAT3/BIRC3/NEDD4/HSPA1B/KLF2/CALCOCO1/SMARCA4/ZBTB7A/OASL** | **17** | **2** |
| **GO:0010506** | **BP** | **GO:0010506** | **regulation of autophagy** | **19/431** | **317/18723** | **0.000149554733062879** | **0.00871513069497489** | **0.00683560559058513** | **ZC3H12A/PLK3/ATP6V1C2/SUPT5H/MCL1/HSPB8/CASP3/NUPR1/ITPR1/STAT3/USP36/ABL2/HIF1A/NEDD4/ATP6V0A1/BID/HMOX1/DAPK3/GBA** | **19** | **2** |
| **GO:19031311** | **BP** | **GO:1903131** | **mononuclear cell differentiation** | **23/431** | **426/18723** | **0.000149841931093899** | **0.00871513069497489** | **0.00683560559058513** | **ZC3H12A/IRF1/SPINK5/CD83/DUSP10/BCL3/LY6D/KLF6/NRARP/IL1A/NFKBIZ/ITGB8/ZFP36L2/STAT3/XBP1/VEGFA/IL6R/PLCG2/MAFB/ZBTB7A/IL18/GBA/EGR3** | **23** | **2** |
| **GO:0061458** | **BP** | **GO:0061458** | **reproductive system development** | **23/431** | **427/18723** | **0.000155067399521552** | **0.00889880116721011** | **0.00697966526688584** | **EREG/ADM/JUNB/ICAM1/YBX3/TRIM28/CASP3/ITGB8/NUPR1/NRIP1/HMGCS1/FEM1B/DHCR24/PLEKHA1/HIF1A/HSPA5/GJB3/ASH1L/ST14/ZP3/STK4/GJB2/VEGFA** | **23** | **2** |
| **GO:0071496** | **BP** | **GO:0071496** | **cellular response to external stimulus** | **19/431** | **320/18723** | **0.000168834524143365** | **0.00940732738470709** | **0.00737852155222941** | **ZC3H12A/MFSD2A/NFKB1/IRF1/KLF10/ICAM1/SLC38A2/GADD45A/CDKN2B/ATP2B1/PIEZO1/PIM1/XBP1/STK26/HSPA5/HMOX1/SLC2A1/GBA/TNRC6A** | **19** | **2** |
| **GO:0030098** | **BP** | **GO:0030098** | **lymphocyte differentiation** | **21/431** | **374/18723** | **0.000169274727552858** | **0.00940732738470709** | **0.00737852155222941** | **ZC3H12A/IRF1/SPINK5/CD83/DUSP10/BCL3/LY6D/KLF6/NRARP/IL1A/NFKBIZ/ZFP36L2/STAT3/XBP1/IL6R/PLCG2/MAFB/ZBTB7A/IL18/GBA/EGR3** | **21** | **2** |
| **GO:0070482** | **BP** | **GO:0070482** | **response to oxygen levels** | **20/431** | **347/18723** | **0.000170485951674524** | **0.00940732738470709** | **0.00737852155222941** | **SOD2/ADM/ICAM1/PLK3/CPEB2/BMP2/CASP3/MALAT1/BACH1/ITPR1/SLC11A2/ATP1B1/EDN1/EGLN3/HK2/HSP90B1/HIF1A/VEGFA/HMOX1/SLC2A1** | **20** | **2** |
| **GO:0022408** | **BP** | **GO:0022408** | **negative regulation of cell-cell adhesion** | **14/431** | **196/18723** | **0.000186791965650002** | **0.00993555649255174** | **0.00779283155733062** | **ZC3H12A/IRF1/SDC4/PRKCD/PELI1/NRARP/BMP2/CASP3/PRNP/GPNMB/CDSN/VEGFA/IL1RN/SWAP70** | **14** | **2** |
| **GO:0060149** | **BP** | **GO:0060149** | **negative regulation of posttranscriptional gene silencing** | **5/431** | **24/18723** | **0.000186984218377484** | **0.00993555649255174** | **0.00779283155733062** | **ZC3H12A/TNF/KCNQ1OT1/NEAT1/STAT3** | **5** | **2** |
| **GO:0060967** | **BP** | **GO:0060967** | **negative regulation of gene silencing by RNA** | **5/431** | **24/18723** | **0.000186984218377484** | **0.00993555649255174** | **0.00779283155733062** | **ZC3H12A/TNF/KCNQ1OT1/NEAT1/STAT3** | **5** | **2** |
| **GO:0006694** | **BP** | **GO:0006694** | **steroid biosynthetic process** | **13/431** | **173/18723** | **0.000191265459963099** | **0.0100391041424534** | **0.00787404788320488** | **NFKB1/TNF/ADM/NR1D1/AKR1B1/BMP2/SQLE/HMGCS1/HMGCR/MSMO1/DHCR24/OSBPL1A/MVD** | **13** | **2** |
| **GO:0051402** | **BP** | **GO:0051402** | **neuron apoptotic process** | **16/431** | **246/18723** | **0.000196719259667298** | **0.0102009601639524** | **0.00800099766332308** | **BTG2/TNF/SOD2/MCL1/CASP3/NUPR1/PRNP/EGLN3/HIF1A/HSPA5/KDM2B/BID/HMOX1/TFAP2A/FOXQ1/GBA** | **16** | **2** |
| **GO:00436201** | **BP** | **GO:0043620** | **regulation of DNA-templated transcription in response to stress** | **7/431** | **53/18723** | **0.000201615518041053** | **0.0103096993091954** | **0.00808628587472847** | **BACH1/HIF1A/HSPA5/NEDD4/VEGFA/HMOX1/KLF2** | **7** | **2** |
| **GO:0060562** | **BP** | **GO:0060562** | **epithelial tube morphogenesis** | **19/431** | **325/18723** | **0.000205844472036345** | **0.0103096993091954** | **0.00808628587472847** | **TNF/ADM/SDC4/ARL13B/EPHA2/NRARP/BMP2/CASP3/CLIC4/EDN1/AHI1/IRX2/HIF1A/KDM2B/MTSS1/ST14/STK4/VEGFA/RALA** | **19** | **2** |
| **GO:0031098** | **BP** | **GO:0031098** | **stress-activated protein kinase signaling cascade** | **16/431** | **247/18723** | **0.000206002356085225** | **0.0103096993091954** | **0.00808628587472847** | **ZC3H12A/NFKB1/TNF/ZFP36/GADD45A/DUSP10/MAP2K3/AKR1B1/PER1/DUSP1/BMP2/EZR/TRAF4/HMGCR/VEGFA/TAOK1** | **16** | **2** |
| **GO:0002698** | **BP** | **GO:0002698** | **negative regulation of immune effector process** | **10/431** | **110/18723** | **0.000227286369419858** | **0.0112441440687709** | **0.00881920613102824** | **ZC3H12A/SPINK5/TNF/DUSP10/CD55/AHR/HLA-A/FER/HLA-F/HMOX1** | **10** | **2** |
| **GO:0046479** | **BP** | **GO:0046479** | **glycosphingolipid catabolic process** | **4/431** | **14/18723** | **0.000230781468870386** | **0.0112873118411153** | **0.00885306424243217** | **PRKCD/GBA2/GM2A/GBA** | **4** | **2** |
| **GO:0098739** | **BP** | **GO:0098739** | **import across plasma membrane** | **13/431** | **177/18723** | **0.000239572594328129** | **0.0115856229886322** | **0.009087040922653** | **SLC3A2/ATP1B3/SLC39A14/SLC6A14/PRNP/ATP1B1/SLC12A7/SLC5A1/SLC5A3/SLC2A1/SLC7A5/TRPV3/SLC30A1** | **13** | **2** |
| **GO:0071548** | **BP** | **GO:0071548** | **response to dexamethasone** | **6/431** | **39/18723** | **0.000246268328562164** | **0.0115932797413582** | **0.00909304640249847** | **ICAM1/CLDN1/FBXO32/EDN1/GJB2/GBA** | **6** | **2** |
| **GO:0007162** | **BP** | **GO:0007162** | **negative regulation of cell adhesion** | **18/431** | **303/18723** | **0.000247370625263487** | **0.0115932797413582** | **0.00909304640249847** | **ZC3H12A/IRF1/SDC4/PRKCD/DUSP1/PELI1/NRARP/BMP2/PHLDB2/CASP3/PRNP/GPNMB/CDSN/VEGFA/IL1RN/KANK1/RCC2/SWAP70** | **18** | **2** |
| **GO:0010631** | **BP** | **GO:0010631** | **epithelial cell migration** | **20/431** | **357/18723** | **0.000247811741683307** | **0.0115932797413582** | **0.00909304640249847** | **ZC3H12A/EFNA1/TNF/NR4A1/GADD45A/DUSP10/MAP2K3/EPHA2/EDN1/EMP2/KRT2/HIF1A/VEGFA/HMOX1/KANK1/PLCG2/MACF1/FGF18/EPPK1/EGR3** | **20** | **2** |
| **GO:0034614** | **BP** | **GO:0034614** | **cellular response to reactive oxygen species** | **12/431** | **155/18723** | **0.000254252160923924** | **0.0116214703977819** | **0.00911515739720372** | **TNFAIP3/SOD2/SETX/KDM6B/PRKCD/GCH1/FER/SMPD3/PLEKHA1/STK26/PPIF/KLF2** | **12** | **2** |
| **GO:0098657** | **BP** | **GO:0098657** | **import into cell** | **15/431** | **227/18723** | **0.000260770997796154** | **0.0116214703977819** | **0.00911515739720372** | **SLC3A2/ATP1B3/SLC39A14/SLC6A14/PRNP/SLC11A2/ATP1B1/SLC12A7/SLC5A1/SLC5A3/STEAP4/SLC2A1/SLC7A5/TRPV3/SLC30A1** | **15** | **2** |
| **GO:0032609** | **BP** | **GO:0032609** | **interferon-gamma production** | **10/431** | **112/18723** | **0.000263346619894746** | **0.0116214703977819** | **0.00911515739720372** | **ZC3H12A/TNF/BCL3/HLA-A/PRNP/ISG15/ZP3/SLC7A5/IL18/IL36RN** | **10** | **2** |
| **GO:0032649** | **BP** | **GO:0032649** | **regulation of interferon-gamma production** | **10/431** | **112/18723** | **0.000263346619894746** | **0.0116214703977819** | **0.00911515739720372** | **ZC3H12A/TNF/BCL3/HLA-A/PRNP/ISG15/ZP3/SLC7A5/IL18/IL36RN** | **10** | **2** |
| **GO:00192211** | **BP** | **GO:0019221** | **cytokine-mediated signaling pathway** | **24/431** | **472/18723** | **0.000265067602352328** | **0.0116214703977819** | **0.00911515739720372** | **CCL20/CXCL8/EREG/IRF1/TNF/TNFAIP3/IRAK2/IL1A/IL36G/FER/STAT3/EDN1/ISG15/IFNGR2/BIRC3/HIF1A/YTHDF3/CD44/IL6R/HSPA1B/IL1RN/IL18/IL36RN/OASL** | **24** | **2** |
| **GO:1901653** | **BP** | **GO:1901653** | **cellular response to peptide** | **20/431** | **359/18723** | **0.000266524200081073** | **0.0116214703977819** | **0.00911515739720372** | **NFKB1/KLF10/ICAM1/NR4A1/PRKCD/AKR1B1/SLC39A14/ATP2B1/CPEB2/PRNP/FER/STAT3/EDN1/XBP1/SMPD3/GJB2/IDE/KLF2/KANK1/RAB8B** | **20** | **2** |
| **GO:0061041** | **BP** | **GO:0061041** | **regulation of wound healing** | **11/431** | **134/18723** | **0.000275357939667287** | **0.0116214703977819** | **0.00911515739720372** | **TNF/TNFAIP3/CLDN1/PRKCD/PHLDB2/EDN1/XBP1/HMGCR/KANK1/SERPINB2/EPPK1** | **11** | **2** |
| **GO:0090132** | **BP** | **GO:0090132** | **epithelium migration** | **20/431** | **360/18723** | **0.000276336203736515** | **0.0116214703977819** | **0.00911515739720372** | **ZC3H12A/EFNA1/TNF/NR4A1/GADD45A/DUSP10/MAP2K3/EPHA2/EDN1/EMP2/KRT2/HIF1A/VEGFA/HMOX1/KANK1/PLCG2/MACF1/FGF18/EPPK1/EGR3** | **20** | **2** |
| **GO:0043409** | **BP** | **GO:0043409** | **negative regulation of MAPK cascade** | **13/431** | **180/18723** | **0.00028233238550915** | **0.0116214703977819** | **0.00911515739720372** | **EFNA1/DUSP10/PRKCD/PER1/DUSP1/TNIP1/DUSP8/BMP2/EZR/DUSP16/HMGCR/ASH1L/GBA** | **13** | **2** |
| **GO:0048660** | **BP** | **GO:0048660** | **regulation of smooth muscle cell proliferation** | **13/431** | **180/18723** | **0.00028233238550915** | **0.0116214703977819** | **0.00911515739720372** | **EREG/TNF/TNFAIP3/SOD2/AKR1B1/BMP2/EDN1/HMGCR/SMPD3/IGFBP3/HMOX1/IL6R/IL18** | **13** | **2** |
| **GO:0150077** | **BP** | **GO:0150077** | **regulation of neuroinflammatory response** | **6/431** | **40/18723** | **0.000284161801460847** | **0.0116214703977819** | **0.00911515739720372** | **TNF/NR1D1/NUPR1/LDLR/PLCG2/IL18** | **6** | **2** |
| **GO:0071385** | **BP** | **GO:0071385** | **cellular response to glucocorticoid stimulus** | **7/431** | **56/18723** | **0.000285905149086976** | **0.0116214703977819** | **0.00911515739720372** | **ZFP36/ICAM1/ATP2B1/FBXO32/ZFP36L2/EDN1/GJB2** | **7** | **2** |
| **GO:0002262** | **BP** | **GO:0002262** | **myeloid cell homeostasis** | **12/431** | **157/18723** | **0.000286216510726041** | **0.0116214703977819** | **0.00911515739720372** | **ZFP36/CASP3/SLC11A2/STAT3/ISG15/HIF1A/VEGFA/HMOX1/HSPA1B/KLF2/MAFB/ZBTB7A** | **12** | **2** |
| **GO:2000377** | **BP** | **GO:2000377** | **regulation of reactive oxygen species metabolic process** | **12/431** | **157/18723** | **0.000286216510726041** | **0.0116214703977819** | **0.00911515739720372** | **ZC3H12A/TNF/SOD2/GADD45A/PRKCD/GCH1/STAT3/HK2/SLC5A3/HIF1A/TFAP2A/PLCG2** | **12** | **2** |
| **GO:0045766** | **BP** | **GO:0045766** | **positive regulation of angiogenesis** | **13/431** | **181/18723** | **0.000297962147942594** | **0.0118743433772678** | **0.00931349520908283** | **ZC3H12A/CXCL8/ADM/IL1A/ITGB8/NINJ1/STAT3/XBP1/HK2/HIF1A/VEGFA/HMOX1/FGF18** | **13** | **2** |
| **GO:1904018** | **BP** | **GO:1904018** | **positive regulation of vasculature development** | **13/431** | **181/18723** | **0.000297962147942594** | **0.0118743433772678** | **0.00931349520908283** | **ZC3H12A/CXCL8/ADM/IL1A/ITGB8/NINJ1/STAT3/XBP1/HK2/HIF1A/VEGFA/HMOX1/FGF18** | **13** | **2** |
| **GO:0032102** | **BP** | **GO:0032102** | **negative regulation of response to external stimulus** | **22/431** | **420/18723** | **0.000316031187836472** | **0.012478882866497** | **0.00978765832343376** | **NFKB1/SPINK5/TNF/TNFAIP3/NR1D1/ZFP36/DUSP10/PRKCD/DUSP1/PHLDB2/HLA-A/EDN1/ISG15/LDLR/HMGCR/HLA-F/YTHDF3/ASH1L/SEMA3C/SERPINB2/EPPK1/GBA** | **22** | **2** |
| **GO:0050679** | **BP** | **GO:0050679** | **positive regulation of epithelial cell proliferation** | **14/431** | **207/18723** | **0.000327738173472187** | **0.0125575053276192** | **0.00984932488399402** | **TNFAIP3/NR4A1/CLDN1/NRARP/BMP2/STAT3/B4GALT1/XBP1/DLX5/HIF1A/VEGFA/HMOX1/TGM1/EGR3** | **14** | **2** |
| **GO:0090130** | **BP** | **GO:0090130** | **tissue migration** | **20/431** | **365/18723** | **0.000330291383256621** | **0.0125575053276192** | **0.00984932488399402** | **ZC3H12A/EFNA1/TNF/NR4A1/GADD45A/DUSP10/MAP2K3/EPHA2/EDN1/EMP2/KRT2/HIF1A/VEGFA/HMOX1/KANK1/PLCG2/MACF1/FGF18/EPPK1/EGR3** | **20** | **2** |
| **GO:0002819** | **BP** | **GO:0002819** | **regulation of adaptive immune response** | **13/431** | **183/18723** | **0.000331446610526788** | **0.0125575053276192** | **0.00984932488399402** | **ZC3H12A/IRF1/TNF/TNFAIP3/DUSP10/CD55/NFKBIZ/AHR/HLA-A/HLA-F/ZP3/NLRP10/IL18** | **13** | **2** |
| **GO:0008203** | **BP** | **GO:0008203** | **cholesterol metabolic process** | **11/431** | **137/18723** | **0.000333533314677341** | **0.0125575053276192** | **0.00984932488399402** | **ABCA5/SQLE/HMGCS1/LDLR/HMGCR/MSMO1/GBA2/DHCR24/OSBPL1A/MVD/GBA** | **11** | **2** |
| **GO:0032703** | **BP** | **GO:0032703** | **negative regulation of interleukin-2 production** | **5/431** | **27/18723** | **0.000335528139562316** | **0.0125575053276192** | **0.00984932488399402** | **TNFAIP3/ZFP36/EZR/PRNP/NAV3** | **5** | **2** |
| **GO:00335611** | **BP** | **GO:0033561** | **regulation of water loss via skin** | **5/431** | **27/18723** | **0.000335528139562316** | **0.0125575053276192** | **0.00984932488399402** | **CLDN1/FLG/GRHL1/FLG2/GBA** | **5** | **2** |
| **GO:0008585** | **BP** | **GO:0008585** | **female gonad development** | **9/431** | **95/18723** | **0.000341543565648945** | **0.0126724440220091** | **0.00993947563553691** | **EREG/ICAM1/CASP3/NUPR1/NRIP1/PLEKHA1/HSPA5/ZP3/VEGFA** | **9** | **2** |
| **GO:0048659** | **BP** | **GO:0048659** | **smooth muscle cell proliferation** | **13/431** | **184/18723** | **0.000349357308180525** | **0.01267492550722** | **0.00994142195794719** | **EREG/TNF/TNFAIP3/SOD2/AKR1B1/BMP2/EDN1/HMGCR/SMPD3/IGFBP3/HMOX1/IL6R/IL18** | **13** | **2** |
| **GO:0002697** | **BP** | **GO:0002697** | **regulation of immune effector process** | **19/431** | **339/18723** | **0.000349806592954495** | **0.01267492550722** | **0.00994142195794719** | **ZC3H12A/SPINK5/TNF/ICAM1/DUSP10/CD55/NFKBIZ/AHR/HLA-A/FER/DDX21/XBP1/HLA-F/ZP3/HMOX1/KLK5/PLCG2/SLC7A5/IL18** | **19** | **2** |
| **GO:0019932** | **BP** | **GO:0019932** | **second-messenger-mediated signaling** | **18/431** | **312/18723** | **0.000352300533367819** | **0.01267492550722** | **0.00994142195794719** | **CCL20/CXCL8/TNF/ADM/GNAI1/NFATC1/NPR2/AHR/PRNP/ITPR1/ATP1B1/EDN1/RCAN1/VEGFA/NFATC2/PLCG2/ADGRG6/CLIC2** | **18** | **2** |
| **GO:19037061** | **BP** | **GO:1903706** | **regulation of hemopoiesis** | **20/431** | **367/18723** | **0.000354323694449723** | **0.01267492550722** | **0.00994142195794719** | **ZC3H12A/IRF1/SPINK5/TNF/KLF10/ZFP36/CD83/DUSP10/NRARP/NFKBIZ/ZFP36L2/STAT3/ISG15/XBP1/HIF1A/HSPA1B/MAFB/MITF/IL18/EGR3** | **20** | **2** |
| **GO:0031424** | **BP** | **GO:0031424** | **keratinization** | **7/431** | **58/18723** | **0.00035633503400874** | **0.01267492550722** | **0.00994142195794719** | **CASP14/CDSN/KRT2/KLK5/TGM1/IVL/PPL** | **7** | **2** |
| **GO:0002718** | **BP** | **GO:0002718** | **regulation of cytokine production involved in immune response** | **9/431** | **96/18723** | **0.000369354281705221** | **0.0130303346595022** | **0.0102201827560711** | **TNF/CD55/HLA-A/DDX21/HLA-F/HMOX1/PLCG2/SLC7A5/IL18** | **9** | **2** |
| **GO:1903311** | **BP** | **GO:1903311** | **regulation of mRNA metabolic process** | **17/431** | **288/18723** | **0.000392809684014844** | **0.0137451453658528** | **0.0107808357435653** | **ZC3H12A/BTG2/ZFP36/YBX3/PRKCD/QKI/SUPT5H/PRDX6/ZFP36L2/TENT5A/SRPK1/YTHDF3/MBNL1/ZBTB7A/SECISBP2/PKP3/TNRC6A** | **17** | **2** |
| **GO:0031331** | **BP** | **GO:0031331** | **positive regulation of cellular catabolic process** | **22/431** | **427/18723** | **0.000396022740961713** | **0.0137458215895098** | **0.0107813661312752** | **ZC3H12A/BTG2/TNF/TNFAIP3/ZFP36/PRKCD/PLK3/SUPT5H/HSPB8/EZR/NUPR1/KCNQ1OT1/ZFP36L2/LDLR/HIF1A/YTHDF3/BID/HMOX1/HSPA1B/NRDC/GBA/TNRC6A** | **22** | **2** |
| **GO:0046165** | **BP** | **GO:0046165** | **alcohol biosynthetic process** | **11/431** | **140/18723** | **0.000401718646643037** | **0.0138187646138681** | **0.0108385780954498** | **NFKB1/AKR1B1/GCH1/BMP2/HMGCS1/HMGCR/MSMO1/DHCR24/PLCG2/MVD/GBA** | **11** | **2** |
| **GO:0019377** | **BP** | **GO:0019377** | **glycolipid catabolic process** | **4/431** | **16/18723** | **0.000404545618342793** | **0.0138187646138681** | **0.0108385780954498** | **PRKCD/GBA2/GM2A/GBA** | **4** | **2** |
| **GO:1901617** | **BP** | **GO:1901617** | **organic hydroxy compound biosynthetic process** | **15/431** | **237/18723** | **0.000412736605687118** | **0.013934302187251** | **0.0109291985703664** | **NFKB1/TNF/NR1D1/AKR1B1/GCH1/BMP2/SQLE/HMGCS1/HMGCR/MSMO1/DHCR24/PLCG2/OSBPL1A/MVD/GBA** | **15** | **2** |
| **GO:0043523** | **BP** | **GO:0043523** | **regulation of neuron apoptotic process** | **14/431** | **212/18723** | **0.000417222320769185** | **0.013934302187251** | **0.0109291985703664** | **BTG2/TNF/SOD2/MCL1/CASP3/NUPR1/PRNP/EGLN3/HIF1A/KDM2B/HMOX1/TFAP2A/FOXQ1/GBA** | **14** | **2** |
| **GO:0033173** | **BP** | **GO:0033173** | **calcineurin-NFAT signaling cascade** | **6/431** | **43/18723** | **0.000425838739842159** | **0.013934302187251** | **0.0109291985703664** | **TNF/NFATC1/PRNP/RCAN1/NFATC2/PLCG2** | **6** | **2** |
| **GO:0002700** | **BP** | **GO:0002700** | **regulation of production of molecular mediator of immune response** | **12/431** | **164/18723** | **0.000426313884501534** | **0.013934302187251** | **0.0109291985703664** | **SPINK5/TNF/CD55/HLA-A/DDX21/XBP1/HLA-F/HMOX1/KLK5/PLCG2/SLC7A5/IL18** | **12** | **2** |
| **GO:0016241** | **BP** | **GO:0016241** | **regulation of macroautophagy** | **11/431** | **141/18723** | **0.000426896138778088** | **0.013934302187251** | **0.0109291985703664** | **ATP6V1C2/SUPT5H/HSPB8/CASP3/NUPR1/USP36/HIF1A/NEDD4/ATP6V0A1/HMOX1/GBA** | **11** | **2** |
| **GO:0002367** | **BP** | **GO:0002367** | **cytokine production involved in immune response** | **9/431** | **98/18723** | **0.000430590657738008** | **0.013934302187251** | **0.0109291985703664** | **TNF/CD55/HLA-A/DDX21/HLA-F/HMOX1/PLCG2/SLC7A5/IL18** | **9** | **2** |
| **GO:0070301** | **BP** | **GO:0070301** | **cellular response to hydrogen peroxide** | **9/431** | **98/18723** | **0.000430590657738008** | **0.013934302187251** | **0.0109291985703664** | **TNFAIP3/SETX/KDM6B/PRKCD/SMPD3/PLEKHA1/STK26/PPIF/KLF2** | **9** | **2** |
| **GO:0051403** | **BP** | **GO:0051403** | **stress-activated MAPK cascade** | **15/431** | **239/18723** | **0.000450870300761146** | **0.0144222096856755** | **0.0113118828169539** | **ZC3H12A/NFKB1/TNF/ZFP36/GADD45A/DUSP10/MAP2K3/PER1/DUSP1/BMP2/EZR/TRAF4/HMGCR/VEGFA/TAOK1** | **15** | **2** |
| **GO:0050729** | **BP** | **GO:0050729** | **positive regulation of inflammatory response** | **11/431** | **142/18723** | **0.000453383061324862** | **0.0144222096856755** | **0.0113118828169539** | **TNF/TNIP1/NFKBIZ/NUPR1/NEAT1/NINJ1/LDLR/ZP3/NLRP10/PLCG2/IL18** | **11** | **2** |
| **GO:0008202** | **BP** | **GO:0008202** | **steroid metabolic process** | **18/431** | **319/18723** | **0.000458784021433113** | **0.0144222096856755** | **0.0113118828169539** | **NFKB1/TNF/ADM/NR1D1/AKR1B1/BMP2/ABCA5/SQLE/HMGCS1/LDLR/HMGCR/MSMO1/GBA2/DHCR24/PLEKHA1/OSBPL1A/MVD/GBA** | **18** | **2** |
| **GO:0071901** | **BP** | **GO:0071901** | **negative regulation of protein serine/threonine kinase activity** | **10/431** | **120/18723** | **0.000459071265552402** | **0.0144222096856755** | **0.0113118828169539** | **TNFAIP3/GADD45A/DUSP10/PRKCD/DUSP1/CDKN2B/BMP2/CASP3/HMGCR/GBA** | **10** | **2** |
| **GO:0008630** | **BP** | **GO:0008630** | **intrinsic apoptotic signaling pathway in response to DNA damage** | **9/431** | **99/18723** | **0.000464203691394736** | **0.0144777730997315** | **0.0113554632975051** | **TNF/BCL3/EPHA2/MCL1/NUPR1/FNIP2/BID/CD44/HMOX1** | **9** | **2** |
| **GO:0060969** | **BP** | **GO:0060969** | **negative regulation of gene silencing** | **5/431** | **29/18723** | **0.000475242297093936** | **0.0146584792383919** | **0.0114971979352188** | **ZC3H12A/TNF/KCNQ1OT1/NEAT1/STAT3** | **5** | **2** |
| **GO:0070555** | **BP** | **GO:0070555** | **response to interleukin-1** | **11/431** | **143/18723** | **0.000481232509218371** | **0.0146584792383919** | **0.0114971979352188** | **ZC3H12A/CCL20/CXCL8/NFKB1/NR1D1/ICAM1/IRAK2/EDN1/HIF1A/IL1RN/KLF2** | **11** | **2** |
| **GO:0009896** | **BP** | **GO:0009896** | **positive regulation of catabolic process** | **24/431** | **492/18723** | **0.000482388869087792** | **0.0146584792383919** | **0.0114971979352188** | **ZC3H12A/BTG2/TNF/TNFAIP3/ZFP36/PRKCD/PLK3/SUPT5H/HSPB8/EZR/NUPR1/KCNQ1OT1/ZFP36L2/LDLR/HIF1A/YTHDF3/NEDD4/BID/IDE/HMOX1/HSPA1B/NRDC/GBA/TNRC6A** | **24** | **2** |
| **GO:0150076** | **BP** | **GO:0150076** | **neuroinflammatory response** | **6/431** | **44/18723** | **0.000483620829891183** | **0.0146584792383919** | **0.0114971979352188** | **TNF/NR1D1/NUPR1/LDLR/PLCG2/IL18** | **6** | **2** |
| **GO:0071384** | **BP** | **GO:0071384** | **cellular response to corticosteroid stimulus** | **7/431** | **61/18723** | **0.000487362162779635** | **0.0146685786615633** | **0.0115051192935906** | **ZFP36/ICAM1/ATP2B1/FBXO32/ZFP36L2/EDN1/GJB2** | **7** | **2** |
| **GO:0046545** | **BP** | **GO:0046545** | **development of primary female sexual characteristics** | **9/431** | **100/18723** | **0.00049994312451622** | **0.0149427444994292** | **0.0117201578971017** | **EREG/ICAM1/CASP3/NUPR1/NRIP1/PLEKHA1/HSPA5/ZP3/VEGFA** | **9** | **2** |
| **GO:0150115** | **BP** | **GO:0150115** | **cell-substrate junction organization** | **9/431** | **101/18723** | **0.000537910050771746** | **0.0158800041688787** | **0.0124552859933462** | **SDC4/PHLDB2/VEGFA/MACF1/DAPK3/RAB8B/RCC2/BCR/COL17A1** | **9** | **2** |
| **GO:0070265** | **BP** | **GO:0070265** | **necrotic cell death** | **7/431** | **62/18723** | **0.000538680438814193** | **0.0158800041688787** | **0.0124552859933462** | **TNF/YBX3/PELI1/NUPR1/NINJ1/BIRC3/PPIF** | **7** | **2** |
| **GO:0022602** | **BP** | **GO:0022602** | **ovulation cycle process** | **6/431** | **45/18723** | **0.00054732762245985** | **0.0160251570548789** | **0.0125691348745345** | **EREG/CASP3/NRIP1/PLEKHA1/HSPA5/ZP3** | **6** | **2** |
| **GO:0030099** | **BP** | **GO:0030099** | **myeloid cell differentiation** | **20/431** | **381/18723** | **0.000569541019549187** | **0.0165628685685115** | **0.0129908822880103** | **TNF/KLF10/JUNB/ZFP36/EPHA2/CDKN2B/CASP3/ITGB8/SLC11A2/STAT3/ISG15/TET2/HIF1A/VEGFA/HSPA1B/KLF2/MAFB/ZBTB7A/MITF/GBA** | **20** | **2** |
| **GO:0006672** | **BP** | **GO:0006672** | **ceramide metabolic process** | **9/431** | **102/18723** | **0.000578208555282485** | **0.0166028145925739** | **0.0130222134607671** | **PRKCD/SGMS2/ITGB8/SPTSSB/GBA2/SMPD3/GM2A/SPTSSA/GBA** | **9** | **2** |
| **GO:19016541** | **BP** | **GO:1901654** | **response to ketone** | **13/431** | **194/18723** | **0.000578629690726321** | **0.0166028145925739** | **0.0130222134607671** | **ICAM1/CLDN1/AKR1B1/GNAI1/DUSP1/ATP2B1/AHR/FBXO32/EDN1/GJB2/KLF2/TXNIP/GBA** | **13** | **2** |
| **GO:0044706** | **BP** | **GO:0044706** | **multi-multicellular organism process** | **14/431** | **220/18723** | **0.000603586419690253** | **0.0170638445749003** | **0.0133838166581162** | **ADM/JUNB/SLC38A2/AKR1B1/TRIM28/EDN1/B4GALT1/EMP2/PSG4/YTHDF3/ASH1L/GJB2/VEGFA/SLC2A1** | **14** | **2** |
| **GO:1902652** | **BP** | **GO:1902652** | **secondary alcohol metabolic process** | **11/431** | **147/18723** | **0.000607368630241787** | **0.0170638445749003** | **0.0133838166581162** | **ABCA5/SQLE/HMGCS1/LDLR/HMGCR/MSMO1/GBA2/DHCR24/OSBPL1A/MVD/GBA** | **11** | **2** |
| **GO:0031668** | **BP** | **GO:0031668** | **cellular response to extracellular stimulus** | **15/431** | **246/18723** | **0.000609036020518316** | **0.0170638445749003** | **0.0133838166581162** | **ZC3H12A/MFSD2A/KLF10/ICAM1/SLC38A2/CDKN2B/ATP2B1/PIM1/XBP1/STK26/HSPA5/HMOX1/SLC2A1/GBA/TNRC6A** | **15** | **2** |
| **GO:0035094** | **BP** | **GO:0035094** | **response to nicotine** | **6/431** | **46/18723** | **0.000617366978673061** | **0.0170638445749003** | **0.0133838166581162** | **NFKB1/TNF/CASP3/EDN1/HMOX1/KCNK1** | **6** | **2** |
| **GO:0043616** | **BP** | **GO:0043616** | **keratinocyte proliferation** | **6/431** | **46/18723** | **0.000617366978673061** | **0.0170638445749003** | **0.0133838166581162** | **EREG/ZFP36/IRF6/KRT2/TGM1/EPPK1** | **6** | **2** |
| **GO:0002460** | **BP** | **GO:0002460** | **adaptive immune response based on somatic recombination of immune receptors built from immunoglobulin superfamily domains** | **19/431** | **356/18723** | **0.000636395509059967** | **0.0170638445749003** | **0.0133838166581162** | **ZC3H12A/TNF/TNFAIP3/ICAM1/NFKB2/CD55/PRKCD/BCL3/NFKBIZ/AHR/HLA-A/STAT3/EMP2/HLA-F/ZP3/NLRP10/IL6R/IL18/SWAP70** | **19** | **2** |
| **GO:20012331** | **BP** | **GO:2001233** | **regulation of apoptotic signaling pathway** | **19/431** | **356/18723** | **0.000636395509059967** | **0.0170638445749003** | **0.0133838166581162** | **TNF/TNFAIP3/SOD2/ICAM1/YBX3/PRKCD/IL1A/MCL1/NUPR1/XBP1/FEM1B/HIF1A/STK4/BID/PPIF/CD44/HMOX1/HSPA1B/DAPK3** | **19** | **2** |
| **GO:0045786** | **BP** | **GO:0045786** | **negative regulation of cell cycle** | **20/431** | **385/18723** | **0.000648824253570262** | **0.0170638445749003** | **0.0133838166581162** | **BTG2/TNF/TNFAIP3/BTG3/NR4A1/TPRA1/DUSP1/OVOL1/PLK3/CDKN2B/NPR2/BMP2/CASP3/NUPR1/PPP1R10/ZFP36L2/GPNMB/FEM1B/DOT1L/TAOK1** | **20** | **2** |
| **GO:00434341** | **BP** | **GO:0043434** | **response to peptide hormone** | **21/431** | **414/18723** | **0.00065231230397744** | **0.0170638445749003** | **0.0133838166581162** | **BTG2/EREG/NFKB1/ADM/ICAM1/NR4A1/PRKCD/GNAI1/SLC39A14/ATP2B1/CPEB2/FER/STAT3/EDN1/XBP1/GJB2/IDE/KANK1/JUND/SLC2A1/RAB8B** | **21** | **2** |
| **GO:00301041** | **BP** | **GO:0030104** | **water homeostasis** | **7/431** | **64/18723** | **0.000654182207575309** | **0.0170638445749003** | **0.0133838166581162** | **CLDN1/FLG/AKR1B1/AQP9/GRHL1/FLG2/GBA** | **7** | **2** |
| **GO:0030149** | **BP** | **GO:0030149** | **sphingolipid catabolic process** | **5/431** | **31/18723** | **0.000654745744269588** | **0.0170638445749003** | **0.0133838166581162** | **PRKCD/GBA2/SMPD3/GM2A/GBA** | **5** | **2** |
| **GO:0060055** | **BP** | **GO:0060055** | **angiogenesis involved in wound healing** | **5/431** | **31/18723** | **0.000654745744269588** | **0.0170638445749003** | **0.0133838166581162** | **TNF/TNFAIP3/B4GALT1/XBP1/VEGFA** | **5** | **2** |
| **GO:0070633** | **BP** | **GO:0070633** | **transepithelial transport** | **5/431** | **31/18723** | **0.000654745744269588** | **0.0170638445749003** | **0.0133838166581162** | **CXADR/RHCG/ITPR1/EDN1/SLC5A1** | **5** | **2** |
| **GO:1900027** | **BP** | **GO:1900027** | **regulation of ruffle assembly** | **5/431** | **31/18723** | **0.000654745744269588** | **0.0170638445749003** | **0.0133838166581162** | **ICAM1/KANK1/EPS8L2/RCC2/EPS8L1** | **5** | **2** |
| **GO:0150078** | **BP** | **GO:0150078** | **positive regulation of neuroinflammatory response** | **4/431** | **18/18723** | **0.00065580018883176** | **0.0170638445749003** | **0.0133838166581162** | **TNF/NUPR1/PLCG2/IL18** | **4** | **2** |
| **GO:0001818** | **BP** | **GO:0001818** | **negative regulation of cytokine production** | **19/431** | **357/18723** | **0.000658238975273449** | **0.0170638445749003** | **0.0133838166581162** | **ZC3H12A/REL/NFKB1/TNF/TNFAIP3/ZFP36/CD83/BCL3/EPHA2/ATP2B1/EZR/PRNP/GPNMB/HLA-F/HMOX1/KLF2/NAV3/IL36RN/GBA** | **19** | **2** |
| **GO:0033002** | **BP** | **GO:0033002** | **muscle cell proliferation** | **15/431** | **248/18723** | **0.000662096199816067** | **0.0170638445749003** | **0.0133838166581162** | **EREG/TNF/TNFAIP3/SOD2/AKR1B1/BMP2/PIM1/STAT3/EDN1/HMGCR/SMPD3/IGFBP3/HMOX1/IL6R/IL18** | **15** | **2** |
| **GO:0048661** | **BP** | **GO:0048661** | **positive regulation of smooth muscle cell proliferation** | **9/431** | **104/18723** | **0.000666231665385039** | **0.0170651276094715** | **0.0133848229905046** | **EREG/TNF/AKR1B1/EDN1/HMGCR/SMPD3/HMOX1/IL6R/IL18** | **9** | **2** |
| **GO:0050727** | **BP** | **GO:0050727** | **regulation of inflammatory response** | **20/431** | **386/18723** | **0.000670075875000159** | **0.0170651276094715** | **0.0133848229905046** | **NFKB1/TNF/TNFAIP3/NR1D1/ZFP36/DUSP10/PRKCD/TNIP1/NFKBIZ/NUPR1/NEAT1/NINJ1/LDLR/BIRC3/ASH1L/ZP3/NLRP10/PLCG2/IL18/GBA** | **20** | **2** |
| **GO:0045646** | **BP** | **GO:0045646** | **regulation of erythrocyte differentiation** | **6/431** | **47/18723** | **0.000694159594557421** | **0.0173924120863237** | **0.0136415245453042** | **ZFP36/STAT3/ISG15/HIF1A/HSPA1B/MAFB** | **6** | **2** |
| **GO:0097300** | **BP** | **GO:0097300** | **programmed necrotic cell death** | **6/431** | **47/18723** | **0.000694159594557421** | **0.0173924120863237** | **0.0136415245453042** | **TNF/YBX3/PELI1/NUPR1/BIRC3/PPIF** | **6** | **2** |
| **GO:0006970** | **BP** | **GO:0006970** | **response to osmotic stress** | **8/431** | **84/18723** | **0.000699090913321095** | **0.0173924120863237** | **0.0136415245453042** | **TNF/CLDN1/YBX3/AKR1B1/PLK3/AQP9/CASP3/SLC2A1** | **8** | **2** |
| **GO:0010660** | **BP** | **GO:0010660** | **regulation of muscle cell apoptotic process** | **8/431** | **84/18723** | **0.000699090913321095** | **0.0173924120863237** | **0.0136415245453042** | **ZC3H12A/SOD2/NUPR1/PPP1R10/EDN1/HMGCR/STK4/HMOX1** | **8** | **2** |
| **GO:0002720** | **BP** | **GO:0002720** | **positive regulation of cytokine production involved in immune response** | **7/431** | **65/18723** | **0.00071885881444464** | **0.017723050579537** | **0.0139008567815924** | **CD55/HLA-A/DDX21/HLA-F/PLCG2/SLC7A5/IL18** | **7** | **2** |
| **GO:20012341** | **BP** | **GO:2001234** | **negative regulation of apoptotic signaling pathway** | **14/431** | **224/18723** | **0.000720616601166118** | **0.017723050579537** | **0.0139008567815924** | **TNF/TNFAIP3/SOD2/ICAM1/YBX3/IL1A/MCL1/XBP1/HIF1A/BID/PPIF/CD44/HMOX1/HSPA1B** | **14** | **2** |
| **GO:2001236** | **BP** | **GO:2001236** | **regulation of extrinsic apoptotic signaling pathway** | **11/431** | **151/18723** | **0.000759936197144248** | **0.0185838942756184** | **0.0145760489488134** | **TNF/TNFAIP3/ICAM1/IL1A/MCL1/FEM1B/STK4/BID/HMOX1/HSPA1B/DAPK3** | **11** | **2** |
| **GO:0097720** | **BP** | **GO:0097720** | **calcineurin-mediated signaling** | **6/431** | **48/18723** | **0.000778138619748602** | **0.0189215176237174** | **0.0148408596701384** | **TNF/NFATC1/PRNP/RCAN1/NFATC2/PLCG2** | **6** | **2** |
| **GO:0043534** | **BP** | **GO:0043534** | **blood vessel endothelial cell migration** | **12/431** | **176/18723** | **0.000800351822764972** | **0.0191930115434685** | **0.0150538025875326** | **EFNA1/TNF/NR4A1/GADD45A/MAP2K3/EPHA2/EMP2/HIF1A/VEGFA/HMOX1/FGF18/EGR3** | **12** | **2** |
| **GO:0016125** | **BP** | **GO:0016125** | **sterol metabolic process** | **11/431** | **152/18723** | **0.000802681709531673** | **0.0191930115434685** | **0.0150538025875326** | **ABCA5/SQLE/HMGCS1/LDLR/HMGCR/MSMO1/GBA2/DHCR24/OSBPL1A/MVD/GBA** | **11** | **2** |
| **GO:0021915** | **BP** | **GO:0021915** | **neural tube development** | **11/431** | **152/18723** | **0.000802681709531673** | **0.0191930115434685** | **0.0150538025875326** | **ADM/SDC4/ARL13B/EPHA2/CASP3/HIF1A/KDM2B/ST14/STK4/SEMA3C/RALA** | **11** | **2** |
| **GO:0062099** | **BP** | **GO:0062099** | **negative regulation of programmed necrotic cell death** | **4/431** | **19/18723** | **0.000815680766848906** | **0.0193960774614237** | **0.0152130748431779** | **YBX3/PELI1/NUPR1/BIRC3** | **4** | **2** |
| **GO:0060964** | **BP** | **GO:0060964** | **regulation of gene silencing by miRNA** | **6/431** | **49/18723** | **0.00086974924963867** | **0.0205681361013452** | **0.0161323646245877** | **ZC3H12A/TNF/ZFP36/KCNQ1OT1/NEAT1/STAT3** | **6** | **2** |
| **GO:0046685** | **BP** | **GO:0046685** | **response to arsenic-containing substance** | **5/431** | **33/18723** | **0.000880687426053582** | **0.0206478749525396** | **0.0161949068119729** | **ZC3H12A/SLC38A2/CPEB2/PPIF/HMOX1** | **5** | **2** |
| **GO:0019915** | **BP** | **GO:0019915** | **lipid storage** | **8/431** | **87/18723** | **0.000882715843695933** | **0.0206478749525396** | **0.0161949068119729** | **ZC3H12A/NFKB1/TNF/EHD1/NRIP1/SQLE/GM2A/GBA** | **8** | **2** |
| **GO:0007568** | **BP** | **GO:0007568** | **aging** | **18/431** | **339/18723** | **0.000929293284639321** | **0.0216198826869602** | **0.0169572891256802** | **SOD2/ADM/ICAM1/NFKB2/CLDN1/MAP2K3/PRKCD/TPRA1/CDKN2B/ATP2B1/PRNP/STAT3/EDN1/HMGCR/GJB2/IDE/JUND/GBA** | **18** | **2** |
| **GO:0032103** | **BP** | **GO:0032103** | **positive regulation of response to external stimulus** | **21/431** | **427/18723** | **0.000965644873795327** | **0.0223448147140596** | **0.0175258806466418** | **CXCL8/EREG/TNF/TNIP1/NFKBIZ/NUPR1/NEAT1/NINJ1/EDN1/LDLR/HLA-F/ZP3/NLRP10/VEGFA/KLK5/IL6R/PLCG2/FGF18/IL18/OASL/SWAP70** | **21** | **2** |
| **GO:0010657** | **BP** | **GO:0010657** | **muscle cell apoptotic process** | **8/431** | **89/18723** | **0.00102527450668394** | **0.0235977619078484** | **0.0185086143705904** | **ZC3H12A/SOD2/NUPR1/PPP1R10/EDN1/HMGCR/STK4/HMOX1** | **8** | **2** |
| **GO:0051091** | **BP** | **GO:0051091** | **positive regulation of DNA-binding transcription factor activity** | **15/431** | **260/18723** | **0.00107026556474637** | **0.0242850093474141** | **0.0190476484487275** | **TNF/ICAM1/IRAK2/CRTC2/BMP2/FER/STAT3/EDN1/TRIM25/VEGFA/HSPA1B/PLCG2/SMARCA4/ZBTB7A/IL18** | **15** | **2** |
| **GO:0061138** | **BP** | **GO:0061138** | **morphogenesis of a branching epithelium** | **12/431** | **182/18723** | **0.0010719946392648** | **0.0242850093474141** | **0.0190476484487275** | **TNF/ADM/EPHA2/NRARP/BMP2/CLIC4/EDN1/FEM1B/ST14/STK4/VEGFA/SEMA3C** | **12** | **2** |
| **GO:0010656** | **BP** | **GO:0010656** | **negative regulation of muscle cell apoptotic process** | **6/431** | **51/18723** | **0.00107770371406973** | **0.0242850093474141** | **0.0190476484487275** | **ZC3H12A/NUPR1/PPP1R10/EDN1/HMGCR/HMOX1** | **6** | **2** |
| **GO:0043124** | **BP** | **GO:0043124** | **negative regulation of I-kappaB kinase/NF-kappaB signaling** | **6/431** | **51/18723** | **0.00107770371406973** | **0.0242850093474141** | **0.0190476484487275** | **ZC3H12A/TNFAIP3/NR1D1/PER1/TNIP1/ASH1L** | **6** | **2** |
| **GO:0002526** | **BP** | **GO:0002526** | **acute inflammatory response** | **9/431** | **112/18723** | **0.00113448365052734** | **0.0254313418326546** | **0.0199467602370679** | **TNF/ICAM1/IL1A/NUPR1/STAT3/B4GALT1/ASH1L/ZP3/IL6R** | **9** | **2** |
| **GO:0002699** | **BP** | **GO:0002699** | **positive regulation of immune effector process** | **14/431** | **235/18723** | **0.0011456474794064** | **0.0255485323904929** | **0.0200386772100153** | **TNF/CD55/NFKBIZ/HLA-A/FER/DDX21/XBP1/HLA-F/ZP3/HMOX1/KLK5/PLCG2/SLC7A5/IL18** | **14** | **2** |
| **GO:0060147** | **BP** | **GO:0060147** | **regulation of posttranscriptional gene silencing** | **6/431** | **52/18723** | **0.0011949941587679** | **0.0263997120123705** | **0.0207062894794738** | **ZC3H12A/TNF/ZFP36/KCNQ1OT1/NEAT1/STAT3** | **6** | **2** |
| **GO:0003018** | **BP** | **GO:0003018** | **vascular process in circulatory system** | **15/431** | **263/18723** | **0.00120034992601939** | **0.0263997120123705** | **0.0207062894794738** | **MFSD2A/SOD2/ADM/ICAM1/SLC38A2/GCH1/ATP2B1/EDN1/HMGCR/SLC5A1/SLC5A3/VEGFA/KLF2/SLC2A1/SLC7A5** | **15** | **2** |
| **GO:0002685** | **BP** | **GO:0002685** | **regulation of leukocyte migration** | **13/431** | **210/18723** | **0.00120397329844346** | **0.0263997120123705** | **0.0207062894794738** | **CCL20/CXCL8/TNF/ICAM1/DUSP1/EDN1/SMPD3/ZP3/VEGFA/HMOX1/STK10/IL6R/SWAP70** | **13** | **2** |
| **GO:0046514** | **BP** | **GO:0046514** | **ceramide catabolic process** | **4/431** | **21/18723** | **0.0012144848927624** | **0.0263997120123705** | **0.0207062894794738** | **PRKCD/GBA2/GM2A/GBA** | **4** | **2** |
| **GO:0046885** | **BP** | **GO:0046885** | **regulation of hormone biosynthetic process** | **4/431** | **21/18723** | **0.0012144848927624** | **0.0263997120123705** | **0.0207062894794738** | **NFKB1/ADM/BMP2/HIF1A** | **4** | **2** |
| **GO:0010632** | **BP** | **GO:0010632** | **regulation of epithelial cell migration** | **16/431** | **292/18723** | **0.00127004605859333** | **0.0271874085246399** | **0.0213241095525631** | **ZC3H12A/EFNA1/TNF/GADD45A/DUSP10/MAP2K3/EPHA2/EDN1/EMP2/HIF1A/VEGFA/HMOX1/PLCG2/MACF1/FGF18/EPPK1** | **16** | **2** |
| **GO:0048525** | **BP** | **GO:0048525** | **negative regulation of viral process** | **8/431** | **92/18723** | **0.00127304134463604** | **0.0271874085246399** | **0.0213241095525631** | **TNF/ZFP36/TNIP1/TRIM28/ISG15/SRPK1/TRIM25/OASL** | **8** | **2** |
| **GO:0046660** | **BP** | **GO:0046660** | **female sex differentiation** | **9/431** | **114/18723** | **0.00128565413020361** | **0.0271874085246399** | **0.0213241095525631** | **EREG/ICAM1/CASP3/NUPR1/NRIP1/PLEKHA1/HSPA5/ZP3/VEGFA** | **9** | **2** |
| **GO:0002934** | **BP** | **GO:0002934** | **desmosome organization** | **3/431** | **10/18723** | **0.00128862252300802** | **0.0271874085246399** | **0.0213241095525631** | **GRHL1/NECTIN1/PKP3** | **3** | **2** |
| **GO:0030214** | **BP** | **GO:0030214** | **hyaluronan catabolic process** | **3/431** | **10/18723** | **0.00128862252300802** | **0.0271874085246399** | **0.0213241095525631** | **CEMIP2/CD44/CEMIP** | **3** | **2** |
| **GO:0042045** | **BP** | **GO:0042045** | **epithelial fluid transport** | **3/431** | **10/18723** | **0.00128862252300802** | **0.0271874085246399** | **0.0213241095525631** | **ITPR1/EDN1/SLC5A1** | **3** | **2** |
| **GO:0001503** | **BP** | **GO:0001503** | **ossification** | **20/431** | **408/18723** | **0.00131593953461548** | **0.027432322499684** | **0.0215162048171802** | **TNF/KLF10/JUNB/SGMS2/EPHA2/ATP2B1/NPR2/BMP2/GPNMB/DDX21/ISG15/DLX5/SMPD3/HIF1A/IL6R/TFAP2A/JUND/FGF18/RRAS2/CRIM1** | **20** | **2** |
| **GO:0060966** | **BP** | **GO:0060966** | **regulation of gene silencing by RNA** | **6/431** | **53/18723** | **0.00132180845332877** | **0.027432322499684** | **0.0215162048171802** | **ZC3H12A/TNF/ZFP36/KCNQ1OT1/NEAT1/STAT3** | **6** | **2** |
| **GO:0046466** | **BP** | **GO:0046466** | **membrane lipid catabolic process** | **5/431** | **36/18723** | **0.0013220161068489** | **0.027432322499684** | **0.0215162048171802** | **PRKCD/GBA2/SMPD3/GM2A/GBA** | **5** | **2** |
| **GO:0032729** | **BP** | **GO:0032729** | **positive regulation of interferon-gamma production** | **7/431** | **72/18723** | **0.00132572562266131** | **0.027432322499684** | **0.0215162048171802** | **TNF/BCL3/HLA-A/ISG15/ZP3/SLC7A5/IL18** | **7** | **2** |
| **GO:0072593** | **BP** | **GO:0072593** | **reactive oxygen species metabolic process** | **14/431** | **239/18723** | **0.00134502421907049** | **0.0275665916137114** | **0.0216215171456595** | **ZC3H12A/TNF/SOD2/GADD45A/PRKCD/GCH1/PRDX6/STAT3/EDN1/HK2/SLC5A3/HIF1A/TFAP2A/PLCG2** | **14** | **2** |
| **GO:1903039** | **BP** | **GO:1903039** | **positive regulation of leukocyte cell-cell adhesion** | **14/431** | **239/18723** | **0.00134502421907049** | **0.0275665916137114** | **0.0216215171456595** | **TNF/ICAM1/CD83/DUSP10/CD55/IL1A/NFKBIZ/HLA-A/XBP1/ZP3/CD44/MAP3K8/IL18/EGR3** | **14** | **2** |
| **GO:0032755** | **BP** | **GO:0032755** | **positive regulation of interleukin-6 production** | **8/431** | **93/18723** | **0.00136546024212438** | **0.0278528003891152** | **0.0218460014791363** | **EREG/TNF/IL1A/STAT3/XBP1/NLRP10/IL6R/PLCG2** | **8** | **2** |
| **GO:0045598** | **BP** | **GO:0045598** | **regulation of fat cell differentiation** | **10/431** | **139/18723** | **0.00143367544550516** | **0.0291063165917651** | **0.0228291814981879** | **ZC3H12A/TNF/NR1D1/ZFP36/DUSP10/BMP2/PIM1/ZFP36L2/XBP1/STK4** | **10** | **2** |
| **GO:0034629** | **BP** | **GO:0034629** | **cellular protein-containing complex localization** | **4/431** | **22/18723** | **0.00145763071867196** | **0.0291797330844842** | **0.022886764821449** | **TNFAIP2/EZR/KLHL21/RCC2** | **4** | **2** |
| **GO:0035809** | **BP** | **GO:0035809** | **regulation of urine volume** | **4/431** | **22/18723** | **0.00145763071867196** | **0.0291797330844842** | **0.022886764821449** | **ADM/AKR1B1/EDN1/MLLT6** | **4** | **2** |
| **GO:0061042** | **BP** | **GO:0061042** | **vascular wound healing** | **4/431** | **22/18723** | **0.00145763071867196** | **0.0291797330844842** | **0.022886764821449** | **TNF/TNFAIP3/XBP1/VEGFA** | **4** | **2** |
| **GO:1902903** | **BP** | **GO:1902903** | **regulation of supramolecular fiber organization** | **19/431** | **383/18723** | **0.00150253146398507** | **0.0298724596292191** | **0.0234300963683491** | **SDC4/ICAM1/PRKCD/PHLDB2/FER/EDN1/LDLR/GBA2/MID1IP1/CLIP1/MTSS1/HSPA1B/KANK1/DAPK3/CGNL1/TAOK1/NAV3/SWAP70/SPTAN1** | **19** | **2** |
| **GO:19033201** | **BP** | **GO:1903320** | **regulation of protein modification by small protein conjugation or removal** | **14/431** | **242/18723** | **0.00151291962696927** | **0.0298724596292191** | **0.0234300963683491** | **ZC3H12A/TNFAIP3/PELI1/SQSTM1/TNIP1/UBE2I/ISG15/BIRC3/HIF1A/HSPA5/ARRDC4/HSPA1B/HMG20B/RASSF5** | **14** | **2** |
| **GO:0030177** | **BP** | **GO:0030177** | **positive regulation of Wnt signaling pathway** | **10/431** | **140/18723** | **0.00151305673772532** | **0.0298724596292191** | **0.0234300963683491** | **NFKB1/TNFAIP3/ATP6V1C2/NRARP/BMP2/DLX5/KANK1/MACF1/SMARCA4/DAPK3** | **10** | **2** |
| **GO:0002702** | **BP** | **GO:0002702** | **positive regulation of production of molecular mediator of immune response** | **9/431** | **117/18723** | **0.00154247130863133** | **0.0301890892597025** | **0.0236784409254221** | **CD55/HLA-A/DDX21/XBP1/HLA-F/KLK5/PLCG2/SLC7A5/IL18** | **9** | **2** |
| **GO:0042692** | **BP** | **GO:0042692** | **muscle cell differentiation** | **19/431** | **384/18723** | **0.00154804678265855** | **0.0301890892597025** | **0.0236784409254221** | **EREG/SOD2/ADM/KDM6B/QKI/NFATC1/CXADR/PIEZO1/BMP2/CASP3/EHD1/NINJ1/EDN1/SYNE1/XBP1/FLNC/RCAN1/VEGFA/NFATC2** | **19** | **2** |
| **GO:0031667** | **BP** | **GO:0031667** | **response to nutrient levels** | **22/431** | **474/18723** | **0.00155013678587227** | **0.0301890892597025** | **0.0236784409254221** | **ZC3H12A/MFSD2A/SOD2/KLF10/ADM/ZFP36/ICAM1/SLC38A2/CDKN2B/ATP2B1/PIM1/XBP1/HMGCS1/LDLR/HMGCR/STK26/HSPA5/TRIM25/HMOX1/SLC2A1/GBA/TNRC6A** | **22** | **2** |
| **GO:0002437** | **BP** | **GO:0002437** | **inflammatory response to antigenic stimulus** | **7/431** | **74/18723** | **0.00155726107035125** | **0.0301912236341971** | **0.0236801149958105** | **TNF/ICAM1/KDM6B/IL36G/ZP3/IL1RN/IL36RN** | **7** | **2** |
| **GO:0007044** | **BP** | **GO:0007044** | **cell-substrate junction assembly** | **8/431** | **95/18723** | **0.00156626701410352** | **0.0302296557340878** | **0.02371025874076** | **SDC4/PHLDB2/VEGFA/MACF1/DAPK3/RCC2/BCR/COL17A1** | **8** | **2** |
| **GO:0002831** | **BP** | **GO:0002831** | **regulation of response to biotic stimulus** | **17/431** | **327/18723** | **0.00159984534703259** | **0.0306032638827923** | **0.0240032936979346** | **ZC3H12A/EREG/IRF1/SPINK5/TNFAIP3/DUSP10/CD55/AHR/HLA-A/ISG15/HLA-F/BIRC3/YTHDF3/NLRP10/KLK5/PLCG2/OASL** | **17** | **2** |
| **GO:0051235** | **BP** | **GO:0051235** | **maintenance of location** | **17/431** | **327/18723** | **0.00159984534703259** | **0.0306032638827923** | **0.0240032936979346** | **ZC3H12A/NFKB1/TNF/NFKBIE/EHD1/NRIP1/ITPR1/SYNE1/SQLE/HK2/HSP90B1/HSPA5/GM2A/PLCG2/CLIC2/CEMIP/GBA** | **17** | **2** |
| **GO:0061013** | **BP** | **GO:0061013** | **regulation of mRNA catabolic process** | **11/431** | **166/18723** | **0.00164239645716278** | **0.0312782050957018** | **0.0245326755385237** | **ZC3H12A/BTG2/ZFP36/YBX3/PRKCD/ZFP36L2/TENT5A/YTHDF3/SECISBP2/PKP3/TNRC6A** | **11** | **2** |
| **GO:1901655** | **BP** | **GO:1901655** | **cellular response to ketone** | **8/431** | **96/18723** | **0.00167507726250337** | **0.0314536195344287** | **0.0246702596964667** | **ICAM1/AKR1B1/GNAI1/ATP2B1/AHR/FBXO32/GJB2/KLF2** | **8** | **2** |
| **GO:0032872** | **BP** | **GO:0032872** | **regulation of stress-activated MAPK cascade** | **12/431** | **192/18723** | **0.00169283990799171** | **0.0314536195344287** | **0.0246702596964667** | **ZC3H12A/TNF/GADD45A/DUSP10/PER1/DUSP1/BMP2/EZR/TRAF4/HMGCR/VEGFA/TAOK1** | **12** | **2** |
| **GO:0035886** | **BP** | **GO:0035886** | **vascular associated smooth muscle cell differentiation** | **5/431** | **38/18723** | **0.00169517021972181** | **0.0314536195344287** | **0.0246702596964667** | **SOD2/ADM/NFATC1/VEGFA/NFATC2** | **5** | **2** |
| **GO:0072538** | **BP** | **GO:0072538** | **T-helper 17 type immune response** | **5/431** | **38/18723** | **0.00169517021972181** | **0.0314536195344287** | **0.0246702596964667** | **ZC3H12A/NFKBIZ/STAT3/NLRP10/IL6R** | **5** | **2** |
| **GO:0006814** | **BP** | **GO:0006814** | **sodium ion transport** | **14/431** | **245/18723** | **0.00169794825917571** | **0.0314536195344287** | **0.0246702596964667** | **SLC38A2/SLC3A2/PER1/ATP1B3/SLC6A14/SLC28A3/ATP1B1/SGK1/SLC5A1/MLLT6/SLC5A3/NEDD4/PRSS8/KCNK1** | **14** | **2** |
| **GO:0070663** | **BP** | **GO:0070663** | **regulation of leukocyte proliferation** | **14/431** | **245/18723** | **0.00169794825917571** | **0.0314536195344287** | **0.0246702596964667** | **IRF1/TNFAIP3/SDC4/CD55/PELI1/IL1A/AHR/HLA-A/CASP3/PRNP/GPNMB/ZP3/NFATC2/IL18** | **14** | **2** |
| **GO:1903034** | **BP** | **GO:1903034** | **regulation of response to wounding** | **11/431** | **167/18723** | **0.00172280638007848** | **0.0314536195344287** | **0.0246702596964667** | **TNF/TNFAIP3/CLDN1/PRKCD/PHLDB2/EDN1/XBP1/HMGCR/KANK1/SERPINB2/EPPK1** | **11** | **2** |
| **GO:0060547** | **BP** | **GO:0060547** | **negative regulation of necrotic cell death** | **4/431** | **23/18723** | **0.00173273964923511** | **0.0314536195344287** | **0.0246702596964667** | **YBX3/PELI1/NUPR1/BIRC3** | **4** | **2** |
| **GO:0030282** | **BP** | **GO:0030282** | **bone mineralization** | **9/431** | **119/18723** | **0.00173545998577267** | **0.0314536195344287** | **0.0246702596964667** | **KLF10/SGMS2/ATP2B1/BMP2/GPNMB/ISG15/SMPD3/HIF1A/TFAP2A** | **9** | **2** |
| **GO:0010876** | **BP** | **GO:0010876** | **lipid localization** | **21/431** | **448/18723** | **0.00174456649713718** | **0.0314536195344287** | **0.0246702596964667** | **ZC3H12A/MFSD2A/NFKB1/TNF/PRKCD/AQP9/EHD1/NRIP1/EDN1/ABCA5/SQLE/LDLR/GULP1/GLTP/STARD5/GM2A/OSBP2/GRAMD1C/SLC2A1/OSBPL1A/GBA** | **21** | **2** |
| **GO:0071900** | **BP** | **GO:0071900** | **regulation of protein serine/threonine kinase activity** | **18/431** | **359/18723** | **0.0017631016259227** | **0.0314536195344287** | **0.0246702596964667** | **TNF/TNFAIP3/GADD45A/DUSP10/PRKCD/DUSP1/CDKN2B/BMP2/CASP3/EDN1/HMGCR/CCNG2/STK4/VEGFA/FGF18/TAOK1/CEMIP/GBA** | **18** | **2** |
| **GO:0006687** | **BP** | **GO:0006687** | **glycosphingolipid metabolic process** | **6/431** | **56/18723** | **0.00176442448140437** | **0.0314536195344287** | **0.0246702596964667** | **PRKCD/ITGB8/GBA2/GLTP/GM2A/GBA** | **6** | **2** |
| **GO:0031529** | **BP** | **GO:0031529** | **ruffle organization** | **6/431** | **56/18723** | **0.00176442448140437** | **0.0314536195344287** | **0.0246702596964667** | **ICAM1/PLEKHA1/KANK1/EPS8L2/RCC2/EPS8L1** | **6** | **2** |
| **GO:0045071** | **BP** | **GO:0045071** | **negative regulation of viral genome replication** | **6/431** | **56/18723** | **0.00176442448140437** | **0.0314536195344287** | **0.0246702596964667** | **TNF/TNIP1/TRIM28/ISG15/SRPK1/OASL** | **6** | **2** |
| **GO:0048008** | **BP** | **GO:0048008** | **platelet-derived growth factor receptor signaling pathway** | **6/431** | **56/18723** | **0.00176442448140437** | **0.0314536195344287** | **0.0246702596964667** | **FER/SMPD3/PLEKHA1/VEGFA/TXNIP/BCR** | **6** | **2** |
| **GO:0007565** | **BP** | **GO:0007565** | **female pregnancy** | **12/431** | **193/18723** | **0.00176853529910124** | **0.0314536195344287** | **0.0246702596964667** | **ADM/JUNB/SLC38A2/AKR1B1/TRIM28/EMP2/PSG4/YTHDF3/ASH1L/GJB2/VEGFA/SLC2A1** | **12** | **2** |
| **GO:0002822** | **BP** | **GO:0002822** | **regulation of adaptive immune response based on somatic recombination of immune receptors built from immunoglobulin superfamily domains** | **11/431** | **168/18723** | **0.00180640201637373** | **0.0319948735739611** | **0.0250947856465695** | **ZC3H12A/TNF/TNFAIP3/CD55/NFKBIZ/AHR/HLA-A/HLA-F/ZP3/NLRP10/IL18** | **11** | **2** |
| **GO:0050777** | **BP** | **GO:0050777** | **negative regulation of immune response** | **12/431** | **194/18723** | **0.00184699061393916** | **0.0325797032885006** | **0.0255534896415137** | **ZC3H12A/SPINK5/TNFAIP3/DUSP10/CD55/AHR/HLA-A/FER/ISG15/HLA-F/YTHDF3/HMOX1** | **12** | **2** |
| **GO:0051222** | **BP** | **GO:0051222** | **positive regulation of protein transport** | **16/431** | **303/18723** | **0.00185482605762402** | **0.0325843728653624** | **0.0255571521667034** | **ZC3H12A/TNF/PRKCD/PLK3/TRIM28/IL1A/EZR/PRNP/USP36/HIF1A/PFKFB2/EDEM1/EXPH5/SYBU/CEMIP/MYOM1** | **16** | **2** |
| **GO:0001890** | **BP** | **GO:0001890** | **placenta development** | **10/431** | **144/18723** | **0.00186705790789872** | **0.0326659237219353** | **0.0256211155782251** | **ADM/JUNB/TRIM28/ITGB8/HIF1A/GJB3/ASH1L/ST14/STK4/GJB2** | **10** | **2** |
| **GO:20012431** | **BP** | **GO:2001243** | **negative regulation of intrinsic apoptotic signaling pathway** | **8/431** | **98/18723** | **0.00191059716330916** | **0.033258969084739** | **0.0260862634158574** | **SOD2/YBX3/MCL1/XBP1/HIF1A/BID/PPIF/CD44** | **8** | **2** |
| **GO:0070302** | **BP** | **GO:0070302** | **regulation of stress-activated protein kinase signaling cascade** | **12/431** | **195/18723** | **0.00192828105477894** | **0.033258969084739** | **0.0260862634158574** | **ZC3H12A/TNF/GADD45A/DUSP10/PER1/DUSP1/BMP2/EZR/TRAF4/HMGCR/VEGFA/TAOK1** | **12** | **2** |
| **GO:00508911** | **BP** | **GO:0050891** | **multicellular organismal water homeostasis** | **6/431** | **57/18723** | **0.00193440768334385** | **0.033258969084739** | **0.0260862634158574** | **CLDN1/FLG/AKR1B1/GRHL1/FLG2/GBA** | **6** | **2** |
| **GO:0001838** | **BP** | **GO:0001838** | **embryonic epithelial tube formation** | **9/431** | **121/18723** | **0.00194731882187598** | **0.033258969084739** | **0.0260862634158574** | **ADM/SDC4/CASP3/IRX2/HIF1A/KDM2B/ST14/STK4/RALA** | **9** | **2** |
| **GO:0002224** | **BP** | **GO:0002224** | **toll-like receptor signaling pathway** | **9/431** | **121/18723** | **0.00194731882187598** | **0.033258969084739** | **0.0260862634158574** | **IRF1/TNFAIP3/NR1D1/PELI1/TNIP1/IRAK2/NINJ1/BIRC3/PLCG2** | **9** | **2** |
| **GO:1904019** | **BP** | **GO:1904019** | **epithelial cell apoptotic process** | **9/431** | **121/18723** | **0.00194731882187598** | **0.033258969084739** | **0.0260862634158574** | **TNF/TNFAIP3/ZFP36/ICAM1/NUPR1/STK4/BID/HMOX1/SERPINB13** | **9** | **2** |
| **GO:0001763** | **BP** | **GO:0001763** | **morphogenesis of a branching structure** | **12/431** | **196/18723** | **0.00201248301340902** | **0.034236074662895** | **0.0268526441606105** | **TNF/ADM/EPHA2/NRARP/BMP2/CLIC4/EDN1/FEM1B/ST14/STK4/VEGFA/SEMA3C** | **12** | **2** |
| **GO:0036003** | **BP** | **GO:0036003** | **positive regulation of transcription from RNA polymerase II promoter in response to stress** | **4/431** | **24/18723** | **0.00204189073540663** | **0.0345995973432683** | **0.0271377687047206** | **HIF1A/HSPA5/VEGFA/KLF2** | **4** | **2** |
| **GO:0002274** | **BP** | **GO:0002274** | **myeloid leukocyte activation** | **13/431** | **223/18723** | **0.00205820950883322** | **0.0346364480030892** | **0.0271666720665983** | **ZC3H12A/CXCL8/TNF/NR1D1/PRKCD/ITGB8/FER/IFNGR2/LDLR/HMOX1/PLCG2/JUND/IL18** | **13** | **2** |
| **GO:0045580** | **BP** | **GO:0045580** | **regulation of T cell differentiation** | **10/431** | **146/18723** | **0.00206760188139009** | **0.0346364480030892** | **0.0271666720665983** | **ZC3H12A/IRF1/SPINK5/CD83/DUSP10/NRARP/NFKBIZ/XBP1/IL18/EGR3** | **10** | **2** |
| **GO:0042129** | **BP** | **GO:0042129** | **regulation of T cell proliferation** | **11/431** | **171/18723** | **0.00207724251779235** | **0.0346364480030892** | **0.0271666720665983** | **IRF1/SDC4/CD55/PELI1/IL1A/HLA-A/CASP3/PRNP/GPNMB/ZP3/IL18** | **11** | **2** |
| **GO:0042594** | **BP** | **GO:0042594** | **response to starvation** | **12/431** | **197/18723** | **0.00209967406608954** | **0.0346364480030892** | **0.0271666720665983** | **ZC3H12A/MFSD2A/KLF10/ADM/ZFP36/SLC38A2/XBP1/STK26/HSPA5/SLC2A1/GBA/TNRC6A** | **12** | **2** |
| **GO:0071248** | **BP** | **GO:0071248** | **cellular response to metal ion** | **12/431** | **197/18723** | **0.00209967406608954** | **0.0346364480030892** | **0.0271666720665983** | **JUNB/CLDN1/PRNP/CLIC4/EDN1/SMPD3/HSPA5/PPIF/HMOX1/TFAP2A/PLCG2/JUND** | **12** | **2** |
| **GO:0061045** | **BP** | **GO:0061045** | **negative regulation of wound healing** | **7/431** | **78/18723** | **0.00211392398393661** | **0.0346364480030892** | **0.0271666720665983** | **TNF/PRKCD/PHLDB2/EDN1/HMGCR/SERPINB2/EPPK1** | **7** | **2** |
| **GO:0002931** | **BP** | **GO:0002931** | **response to ischemia** | **6/431** | **58/18723** | **0.00211649298903635** | **0.0346364480030892** | **0.0271666720665983** | **SQSTM1/HK2/RCAN1/GJB2/BID/PPIF** | **6** | **2** |
| **GO:0006826** | **BP** | **GO:0006826** | **iron ion transport** | **6/431** | **58/18723** | **0.00211649298903635** | **0.0346364480030892** | **0.0271666720665983** | **SLC39A14/NECTIN1/SLC11A2/STEAP4/PGRMC2/HEPHL1** | **6** | **2** |
| **GO:0043525** | **BP** | **GO:0043525** | **positive regulation of neuron apoptotic process** | **6/431** | **58/18723** | **0.00211649298903635** | **0.0346364480030892** | **0.0271666720665983** | **TNF/MCL1/CASP3/NUPR1/PRNP/TFAP2A** | **6** | **2** |
| **GO:0070266** | **BP** | **GO:0070266** | **necroptotic process** | **5/431** | **40/18723** | **0.00214025577378592** | **0.0347651493546377** | **0.027267617389044** | **TNF/YBX3/PELI1/BIRC3/PPIF** | **5** | **2** |
| **GO:1902105** | **BP** | **GO:1902105** | **regulation of leukocyte differentiation** | **15/431** | **279/18723** | **0.00214051221630553** | **0.0347651493546377** | **0.027267617389044** | **ZC3H12A/IRF1/SPINK5/TNF/KLF10/CD83/DUSP10/NRARP/NFKBIZ/ZFP36L2/XBP1/MAFB/MITF/IL18/EGR3** | **15** | **2** |
| **GO:0016331** | **BP** | **GO:0016331** | **morphogenesis of embryonic epithelium** | **10/431** | **147/18723** | **0.00217418825008705** | **0.0350530644041979** | **0.0274934400176733** | **ADM/SDC4/CASP3/IRX2/HIF1A/KDM2B/ST14/STK4/TFAP2A/RALA** | **10** | **2** |
| **GO:0002221** | **BP** | **GO:0002221** | **pattern recognition receptor signaling pathway** | **11/431** | **172/18723** | **0.00217452792656153** | **0.0350530644041979** | **0.0274934400176733** | **IRF1/TNFAIP3/NR1D1/PELI1/TNIP1/IRAK2/NINJ1/BIRC3/HSPA1B/PLCG2/OASL** | **11** | **2** |
| **GO:0007346** | **BP** | **GO:0007346** | **regulation of mitotic cell cycle** | **21/431** | **457/18723** | **0.00221464612351017** | **0.0354797626849017** | **0.0278281155670318** | **BTG2/EREG/TNF/BTG3/PIM3/TPRA1/DUSP1/OVOL1/PLK3/CDKN2B/IL1A/PPP1R10/ZFP36L2/GPNMB/EDN1/SMPD3/BID/DAPK3/TAOK1/RCC2/MEPCE** | **21** | **2** |
| **GO:0034284** | **BP** | **GO:0034284** | **response to monosaccharide** | **13/431** | **225/18723** | **0.00222572860709188** | **0.0354797626849017** | **0.0278281155670318** | **SOD2/NR1D1/ICAM1/PIM3/SLC39A14/CASP3/XBP1/HMGCR/HIF1A/PFKFB2/SMARCA4/TXNIP/SYBU** | **13** | **2** |
| **GO:0050670** | **BP** | **GO:0050670** | **regulation of lymphocyte proliferation** | **13/431** | **225/18723** | **0.00222572860709188** | **0.0354797626849017** | **0.0278281155670318** | **IRF1/SDC4/CD55/PELI1/IL1A/AHR/HLA-A/CASP3/PRNP/GPNMB/ZP3/NFATC2/IL18** | **13** | **2** |
| **GO:2000628** | **BP** | **GO:2000628** | **regulation of miRNA metabolic process** | **3/431** | **12/18723** | **0.00228282703030645** | **0.0361591813674808** | **0.0283610092558968** | **ZC3H12A/NFKB1/KCNQ1OT1** | **3** | **2** |
| **GO:0035148** | **BP** | **GO:0035148** | **tube formation** | **10/431** | **148/18723** | **0.00228515272582592** | **0.0361591813674808** | **0.0283610092558968** | **ADM/SDC4/CASP3/IRX2/HIF1A/KDM2B/ST14/STK4/VEGFA/RALA** | **10** | **2** |
| **GO:0043254** | **BP** | **GO:0043254** | **regulation of protein-containing complex assembly** | **20/431** | **428/18723** | **0.00230597144147978** | **0.0363046948005557** | **0.0284751409277495** | **TNF/ICAM1/PRKCD/PIEZO1/PMEPA1/FER/ISG15/GBA2/HSPA5/FNIP2/CLIP1/BID/VEGFA/HSPA1B/KANK1/PLCG2/STXBP6/NAV3/GBA/SPTAN1** | **20** | **2** |
| **GO:0043407** | **BP** | **GO:0043407** | **negative regulation of MAP kinase activity** | **6/431** | **59/18723** | **0.0023112189533811** | **0.0363046948005557** | **0.0284751409277495** | **DUSP10/PRKCD/DUSP1/BMP2/HMGCR/GBA** | **6** | **2** |
| **GO:0050900** | **BP** | **GO:0050900** | **leukocyte migration** | **18/431** | **369/18723** | **0.00237524001921819** | **0.0368260314944347** | **0.0288840449527128** | **CCL20/CXCL8/TNF/ICAM1/DUSP1/CXADR/NINJ1/FER/EDN1/B4GALT1/SMPD3/ZP3/VEGFA/HMOX1/STK10/IL6R/SWAP70/GBA** | **18** | **2** |
| **GO:0045216** | **BP** | **GO:0045216** | **cell-cell junction organization** | **12/431** | **200/18723** | **0.00237997519371219** | **0.0368260314944347** | **0.0288840449527128** | **TNF/CLDN1/POF1B/CXADR/EPHA2/GRHL1/NECTIN1/MTSS1/GJB2/VEGFA/DSG1/PKP3** | **12** | **2** |
| **GO:0045619** | **BP** | **GO:0045619** | **regulation of lymphocyte differentiation** | **11/431** | **174/18723** | **0.00238019967350389** | **0.0368260314944347** | **0.0288840449527128** | **ZC3H12A/IRF1/SPINK5/CD83/DUSP10/NRARP/NFKBIZ/ZFP36L2/XBP1/IL18/EGR3** | **11** | **2** |
| **GO:00614361** | **BP** | **GO:0061436** | **establishment of skin barrier** | **4/431** | **25/18723** | **0.00238713814491065** | **0.0368260314944347** | **0.0288840449527128** | **CLDN1/FLG/GRHL1/FLG2** | **4** | **2** |
| **GO:0032733** | **BP** | **GO:0032733** | **positive regulation of interleukin-10 production** | **5/431** | **41/18723** | **0.00239216859153423** | **0.0368260314944347** | **0.0288840449527128** | **CD83/BCL3/STAT3/ISG15/PLCG2** | **5** | **2** |
| **GO:0051592** | **BP** | **GO:0051592** | **response to calcium ion** | **10/431** | **149/18723** | **0.00240062411469253** | **0.0368260314944347** | **0.0288840449527128** | **JUNB/DUSP1/CLIC4/EDN1/HSPA5/NEDD4/PPIF/PLCG2/JUND/TXNIP** | **10** | **2** |
| **GO:0032944** | **BP** | **GO:0032944** | **regulation of mononuclear cell proliferation** | **13/431** | **227/18723** | **0.00240430177740152** | **0.0368260314944347** | **0.0288840449527128** | **IRF1/SDC4/CD55/PELI1/IL1A/AHR/HLA-A/CASP3/PRNP/GPNMB/ZP3/NFATC2/IL18** | **13** | **2** |
| **GO:0001570** | **BP** | **GO:0001570** | **vasculogenesis** | **7/431** | **80/18723** | **0.0024443394294354** | **0.0372743584206054** | **0.0292356846641757** | **ADM/JUNB/QKI/EPHA2/ITGB8/EMP2/VEGFA** | **7** | **2** |
| **GO:0001841** | **BP** | **GO:0001841** | **neural tube formation** | **8/431** | **102/18723** | **0.00245955339020723** | **0.0372743584206054** | **0.0292356846641757** | **ADM/SDC4/CASP3/HIF1A/KDM2B/ST14/STK4/RALA** | **8** | **2** |
| **GO:0035710** | **BP** | **GO:0035710** | **CD4-positive, alpha-beta T cell activation** | **8/431** | **102/18723** | **0.00245955339020723** | **0.0372743584206054** | **0.0292356846641757** | **ZC3H12A/CD83/CD55/BCL3/NFKBIZ/STAT3/IL6R/IL18** | **8** | **2** |
| **GO:0031663** | **BP** | **GO:0031663** | **lipopolysaccharide-mediated signaling pathway** | **6/431** | **60/18723** | **0.00251913040596694** | **0.0380432886571288** | **0.0298387856396527** | **TNF/TNFAIP3/CD55/IRAK2/PLCG2/IL18** | **6** | **2** |
| **GO:0022409** | **BP** | **GO:0022409** | **positive regulation of cell-cell adhesion** | **15/431** | **284/18723** | **0.00253699107836617** | **0.0381790545499581** | **0.0299452719481793** | **TNF/ICAM1/CD83/DUSP10/CD55/IL1A/PIEZO1/NFKBIZ/HLA-A/XBP1/ZP3/CD44/MAP3K8/IL18/EGR3** | **15** | **2** |
| **GO:0019722** | **BP** | **GO:0019722** | **calcium-mediated signaling** | **12/431** | **202/18723** | **0.00258326304811831** | **0.0387399448052306** | **0.0303851993226313** | **CCL20/CXCL8/TNF/NFATC1/PRNP/ITPR1/ATP1B1/EDN1/RCAN1/NFATC2/PLCG2/CLIC2** | **12** | **2** |
| **GO:0060968** | **BP** | **GO:0060968** | **regulation of gene silencing** | **7/431** | **81/18723** | **0.0026237648528054** | **0.0392107080780362** | **0.0307544367066773** | **ZC3H12A/TNF/ZFP36/TRIM28/KCNQ1OT1/NEAT1/STAT3** | **7** | **2** |
| **GO:0071456** | **BP** | **GO:0071456** | **cellular response to hypoxia** | **10/431** | **151/18723** | **0.00264561233980295** | **0.0394003996903526** | **0.0309032189901587** | **ICAM1/PLK3/CPEB2/MALAT1/BACH1/EDN1/EGLN3/HIF1A/VEGFA/HMOX1** | **10** | **2** |
| **GO:0010939** | **BP** | **GO:0010939** | **regulation of necrotic cell death** | **5/431** | **42/18723** | **0.00266494993104202** | **0.0394156168495012** | **0.0309151543818114** | **YBX3/PELI1/NUPR1/BIRC3/PPIF** | **5** | **2** |
| **GO:1902895** | **BP** | **GO:1902895** | **positive regulation of pri-miRNA transcription by RNA polymerase II** | **5/431** | **42/18723** | **0.00266494993104202** | **0.0394156168495012** | **0.0309151543818114** | **TNF/BMP2/STAT3/HIF1A/SMARCA4** | **5** | **2** |
| **GO:0031348** | **BP** | **GO:0031348** | **negative regulation of defense response** | **14/431** | **258/18723** | **0.00273122747243374** | **0.040257544662174** | **0.0315755101084895** | **NFKB1/SPINK5/TNFAIP3/NR1D1/ZFP36/DUSP10/PRKCD/HLA-A/ISG15/LDLR/HLA-F/YTHDF3/ASH1L/GBA** | **14** | **2** |
| **GO:0008643** | **BP** | **GO:0008643** | **carbohydrate transport** | **10/431** | **152/18723** | **0.00277539618700515** | **0.0406302897580617** | **0.0318678681408002** | **MFSD2A/TNF/AQP9/EZR/EDN1/SLC5A1/HK2/SLC5A3/SMPD3/SLC2A1** | **10** | **2** |
| **GO:0051092** | **BP** | **GO:0051092** | **positive regulation of NF-kappaB transcription factor activity** | **10/431** | **152/18723** | **0.00277539618700515** | **0.0406302897580617** | **0.0318678681408002** | **TNF/ICAM1/IRAK2/FER/STAT3/TRIM25/HSPA1B/PLCG2/ZBTB7A/IL18** | **10** | **2** |
| **GO:0008625** | **BP** | **GO:0008625** | **extrinsic apoptotic signaling pathway via death domain receptors** | **7/431** | **82/18723** | **0.00281313692404189** | **0.0409045314901227** | **0.0320829662709899** | **TNF/TNFAIP3/ICAM1/FEM1B/STK4/BID/HMOX1** | **7** | **2** |
| **GO:0046889** | **BP** | **GO:0046889** | **positive regulation of lipid biosynthetic process** | **7/431** | **82/18723** | **0.00281313692404189** | **0.0409045314901227** | **0.0320829662709899** | **MFSD2A/TNF/ADM/NR1D1/PRKCD/LDLR/MID1IP1** | **7** | **2** |
| **GO:0003334** | **BP** | **GO:0003334** | **keratinocyte development** | **3/431** | **13/18723** | **0.00291730899180943** | **0.0415764831150589** | **0.0326100032650151** | **CDSN/KRT2/EXPH5** | **3** | **2** |
| **GO:0015791** | **BP** | **GO:0015791** | **polyol transport** | **3/431** | **13/18723** | **0.00291730899180943** | **0.0415764831150589** | **0.0326100032650151** | **AQP9/SLC5A1/SLC5A3** | **3** | **2** |
| **GO:0060213** | **BP** | **GO:0060213** | **positive regulation of nuclear-transcribed mRNA poly(A) tail shortening** | **3/431** | **13/18723** | **0.00291730899180943** | **0.0415764831150589** | **0.0326100032650151** | **BTG2/ZFP36/TNRC6A** | **3** | **2** |
| **GO:0061418** | **BP** | **GO:0061418** | **regulation of transcription from RNA polymerase II promoter in response to hypoxia** | **3/431** | **13/18723** | **0.00291730899180943** | **0.0415764831150589** | **0.0326100032650151** | **BACH1/HIF1A/VEGFA** | **3** | **2** |
| **GO:0061469** | **BP** | **GO:0061469** | **regulation of type B pancreatic cell proliferation** | **3/431** | **13/18723** | **0.00291730899180943** | **0.0415764831150589** | **0.0326100032650151** | **NR1D1/NR4A1/NUPR1** | **3** | **2** |
| **GO:0070424** | **BP** | **GO:0070424** | **regulation of nucleotide-binding oligomerization domain containing signaling pathway** | **3/431** | **13/18723** | **0.00291730899180943** | **0.0415764831150589** | **0.0326100032650151** | **TNFAIP3/BIRC3/HSPA1B** | **3** | **2** |
| **GO:0006417** | **BP** | **GO:0006417** | **regulation of translation** | **21/431** | **468/18723** | **0.00293090341525485** | **0.0416323706246101** | **0.0326538379458826** | **ZC3H12A/BTG2/TNF/ZFP36/YBX3/BCL3/QKI/PER1/CPEB2/EIF5B/ZFP36L2/STAT3/YTHDF3/EIF3B/GRB7/SECISBP2L/DAPK3/DIO2/SECISBP2/ENC1/TNRC6A** | **21** | **2** |
| **GO:0062207** | **BP** | **GO:0062207** | **regulation of pattern recognition receptor signaling pathway** | **8/431** | **105/18723** | **0.00294683671309659** | **0.0417210039906834** | **0.032723356436637** | **IRF1/TNFAIP3/NR1D1/PELI1/NINJ1/BIRC3/HSPA1B/OASL** | **8** | **2** |
| **GO:2001239** | **BP** | **GO:2001239** | **regulation of extrinsic apoptotic signaling pathway in absence of ligand** | **5/431** | **43/18723** | **0.00295956982462095** | **0.0417638968038313** | **0.0327569988871764** | **TNF/IL1A/MCL1/HSPA1B/DAPK3** | **5** | **2** |
| **GO:0070661** | **BP** | **GO:0070661** | **leukocyte proliferation** | **16/431** | **318/18723** | **0.00300179517651647** | **0.0422213282344016** | **0.033115779604707** | **IRF1/TNFAIP3/SDC4/CD55/PRKCD/PELI1/IL1A/AHR/HLA-A/CASP3/PRNP/GPNMB/ZP3/NFATC2/IL18/GBA** | **16** | **2** |
| **GO:0043367** | **BP** | **GO:0043367** | **CD4-positive, alpha-beta T cell differentiation** | **7/431** | **83/18723** | **0.00301281199214352** | **0.042238250209074** | **0.0331290521474517** | **ZC3H12A/CD83/BCL3/NFKBIZ/STAT3/IL6R/IL18** | **7** | **2** |
| **GO:1904951** | **BP** | **GO:1904951** | **positive regulation of establishment of protein localization** | **16/431** | **319/18723** | **0.00309551219529187** | **0.0432567678199227** | **0.0339279139108032** | **ZC3H12A/TNF/PRKCD/PLK3/TRIM28/IL1A/EZR/PRNP/USP36/HIF1A/PFKFB2/EDEM1/EXPH5/SYBU/CEMIP/MYOM1** | **16** | **2** |
| **GO:0034143** | **BP** | **GO:0034143** | **regulation of toll-like receptor 4 signaling pathway** | **4/431** | **27/18723** | **0.00319397960597215** | **0.0443665597701622** | **0.0347983655798548** | **TNFAIP3/NR1D1/PELI1/NINJ1** | **4** | **2** |
| **GO:0006665** | **BP** | **GO:0006665** | **sphingolipid metabolic process** | **10/431** | **155/18723** | **0.0031955468235944** | **0.0443665597701622** | **0.0347983655798548** | **PRKCD/SGMS2/ITGB8/SPTSSB/GBA2/SMPD3/GLTP/GM2A/SPTSSA/GBA** | **10** | **2** |
| **GO:0045936** | **BP** | **GO:0045936** | **negative regulation of phosphate metabolic process** | **20/431** | **441/18723** | **0.00324019498069862** | **0.0448417980608581** | **0.0351711128891538** | **ZC3H12A/TNF/TNFAIP3/GADD45A/DUSP10/PRKCD/DUSP1/CDKN2B/BMP2/CASP3/NUPR1/PRNP/PMEPA1/STAT3/HMGCR/MIDN/IGFBP3/CDA/SWAP70/GBA** | **20** | **2** |
| **GO:0097178** | **BP** | **GO:0097178** | **ruffle assembly** | **5/431** | **44/18723** | **0.00327699918291963** | **0.0452057836002759** | **0.0354566004710636** | **ICAM1/KANK1/EPS8L2/RCC2/EPS8L1** | **5** | **2** |
| **GO:0002824** | **BP** | **GO:0002824** | **positive regulation of adaptive immune response based on somatic recombination of immune receptors built from immunoglobulin superfamily domains** | **8/431** | **107/18723** | **0.00331133134957695** | **0.0452911987255561** | **0.0355235947742268** | **TNF/CD55/NFKBIZ/HLA-A/HLA-F/ZP3/NLRP10/IL18** | **8** | **2** |
| **GO:0007015** | **BP** | **GO:0007015** | **actin filament organization** | **20/431** | **442/18723** | **0.00332357741789826** | **0.0452911987255561** | **0.0355235947742268** | **SDC4/ICAM1/POF1B/PRKCD/RND3/MARCKS/PHLDB2/EZR/FER/EMP2/GBA2/HSP90B1/MTSS1/SH3KBP1/KANK1/MYO1B/CGNL1/GAS7/SWAP70/SPTAN1** | **20** | **2** |
| **GO:0010563** | **BP** | **GO:0010563** | **negative regulation of phosphorus metabolic process** | **20/431** | **442/18723** | **0.00332357741789826** | **0.0452911987255561** | **0.0355235947742268** | **ZC3H12A/TNF/TNFAIP3/GADD45A/DUSP10/PRKCD/DUSP1/CDKN2B/BMP2/CASP3/NUPR1/PRNP/PMEPA1/STAT3/HMGCR/MIDN/IGFBP3/CDA/SWAP70/GBA** | **20** | **2** |
| **GO:0019079** | **BP** | **GO:0019079** | **viral genome replication** | **9/431** | **131/18723** | **0.0033363028982537** | **0.0452911987255561** | **0.0355235947742268** | **ZC3H12A/CXCL8/TNF/TNIP1/TRIM28/ISG15/SRPK1/PCBP1/OASL** | **9** | **2** |
| **GO:0009267** | **BP** | **GO:0009267** | **cellular response to starvation** | **10/431** | **156/18723** | **0.00334632927386776** | **0.0452911987255561** | **0.0355235947742268** | **ZC3H12A/MFSD2A/KLF10/SLC38A2/XBP1/STK26/HSPA5/SLC2A1/GBA/TNRC6A** | **10** | **2** |
| **GO:0046631** | **BP** | **GO:0046631** | **alpha-beta T cell activation** | **10/431** | **156/18723** | **0.00334632927386776** | **0.0452911987255561** | **0.0355235947742268** | **ZC3H12A/IRF1/CD83/CD55/BCL3/NFKBIZ/HLA-A/STAT3/IL6R/IL18** | **10** | **2** |
| **GO:0045069** | **BP** | **GO:0045069** | **regulation of viral genome replication** | **7/431** | **85/18723** | **0.00344451558445213** | **0.0461938500893304** | **0.0362315782714935** | **CXCL8/TNF/TNIP1/TRIM28/ISG15/SRPK1/OASL** | **7** | **2** |
| **GO:0071277** | **BP** | **GO:0071277** | **cellular response to calcium ion** | **7/431** | **85/18723** | **0.00344451558445213** | **0.0461938500893304** | **0.0362315782714935** | **JUNB/CLIC4/EDN1/HSPA5/PPIF/PLCG2/JUND** | **7** | **2** |
| **GO:0001885** | **BP** | **GO:0001885** | **endothelial cell development** | **6/431** | **64/18723** | **0.00349371351951619** | **0.0461938500893304** | **0.0362315782714935** | **TNF/ICAM1/CLDN1/EZR/CLIC4/VEGFA** | **6** | **2** |
| **GO:0016126** | **BP** | **GO:0016126** | **sterol biosynthetic process** | **6/431** | **64/18723** | **0.00349371351951619** | **0.0461938500893304** | **0.0362315782714935** | **SQLE/HMGCS1/HMGCR/MSMO1/DHCR24/MVD** | **6** | **2** |
| **GO:0051250** | **BP** | **GO:0051250** | **negative regulation of lymphocyte activation** | **10/431** | **157/18723** | **0.00350271504258223** | **0.0461938500893304** | **0.0362315782714935** | **ZC3H12A/IRF1/TNFAIP3/SDC4/PELI1/NRARP/CASP3/PRNP/GPNMB/HLA-F** | **10** | **2** |
| **GO:0002832** | **BP** | **GO:0002832** | **negative regulation of response to biotic stimulus** | **8/431** | **108/18723** | **0.00350622419019868** | **0.0461938500893304** | **0.0362315782714935** | **SPINK5/TNFAIP3/DUSP10/AHR/HLA-A/ISG15/HLA-F/YTHDF3** | **8** | **2** |
| **GO:0098659** | **BP** | **GO:0098659** | **inorganic cation import across plasma membrane** | **8/431** | **108/18723** | **0.00350622419019868** | **0.0461938500893304** | **0.0362315782714935** | **ATP1B3/SLC39A14/PRNP/ATP1B1/SLC12A7/SLC5A1/TRPV3/SLC30A1** | **8** | **2** |
| **GO:0099587** | **BP** | **GO:0099587** | **inorganic ion import across plasma membrane** | **8/431** | **108/18723** | **0.00350622419019868** | **0.0461938500893304** | **0.0362315782714935** | **ATP1B3/SLC39A14/PRNP/ATP1B1/SLC12A7/SLC5A1/TRPV3/SLC30A1** | **8** | **2** |
| **GO:0072175** | **BP** | **GO:0072175** | **epithelial tube formation** | **9/431** | **132/18723** | **0.00350961639851557** | **0.0461938500893304** | **0.0362315782714935** | **ADM/SDC4/CASP3/IRX2/HIF1A/KDM2B/ST14/STK4/RALA** | **9** | **2** |
| **GO:0006066** | **BP** | **GO:0006066** | **alcohol metabolic process** | **17/431** | **353/18723** | **0.00353159647313318** | **0.0463414366474549** | **0.0363473359734856** | **NFKB1/AKR1B1/GCH1/BMP2/ABCA5/SQLE/HMGCS1/LDLR/HMGCR/MSMO1/GBA2/SLC5A3/DHCR24/PLCG2/OSBPL1A/MVD/GBA** | **17** | **2** |
| **GO:0002920** | **BP** | **GO:0002920** | **regulation of humoral immune response** | **5/431** | **45/18723** | **0.0036182081279771** | **0.0467374480822681** | **0.0366579426726262** | **SPINK5/TNF/CD55/ZP3/KLK5** | **5** | **2** |
| **GO:0031670** | **BP** | **GO:0031670** | **cellular response to nutrient** | **5/431** | **45/18723** | **0.0036182081279771** | **0.0467374480822681** | **0.0366579426726262** | **CDKN2B/ATP2B1/PIM1/XBP1/HMOX1** | **5** | **2** |
| **GO:0071354** | **BP** | **GO:0071354** | **cellular response to interleukin-6** | **5/431** | **45/18723** | **0.0036182081279771** | **0.0467374480822681** | **0.0366579426726262** | **NFKB1/ICAM1/FER/STAT3/IL6R** | **5** | **2** |
| **GO:0002467** | **BP** | **GO:0002467** | **germinal center formation** | **3/431** | **14/18723** | **0.00364999831624735** | **0.0467374480822681** | **0.0366579426726262** | **TNFAIP3/NFKB2/BCL3** | **3** | **2** |
| **GO:0030213** | **BP** | **GO:0030213** | **hyaluronan biosynthetic process** | **3/431** | **14/18723** | **0.00364999831624735** | **0.0467374480822681** | **0.0366579426726262** | **NFKB1/SMPD3/CEMIP** | **3** | **2** |
| **GO:0033212** | **BP** | **GO:0033212** | **iron import into cell** | **3/431** | **14/18723** | **0.00364999831624735** | **0.0467374480822681** | **0.0366579426726262** | **SLC39A14/SLC11A2/STEAP4** | **3** | **2** |
| **GO:0061043** | **BP** | **GO:0061043** | **regulation of vascular wound healing** | **3/431** | **14/18723** | **0.00364999831624735** | **0.0467374480822681** | **0.0366579426726262** | **TNF/TNFAIP3/XBP1** | **3** | **2** |
| **GO:0072531** | **BP** | **GO:0072531** | **pyrimidine-containing compound transmembrane transport** | **3/431** | **14/18723** | **0.00364999831624735** | **0.0467374480822681** | **0.0366579426726262** | **SLC19A2/AQP9/SLC28A3** | **3** | **2** |
| **GO:0006972** | **BP** | **GO:0006972** | **hyperosmotic response** | **4/431** | **28/18723** | **0.00365950743580956** | **0.0467374480822681** | **0.0366579426726262** | **CLDN1/YBX3/AKR1B1/SLC2A1** | **4** | **2** |
| **GO:0002456** | **BP** | **GO:0002456** | **T cell mediated immunity** | **8/431** | **109/18723** | **0.00370988884906889** | **0.0472407148118121** | **0.0370526737432698** | **ICAM1/CD55/AHR/HLA-A/EMP2/HLA-F/ZP3/IL18** | **8** | **2** |
| **GO:0043433** | **BP** | **GO:0043433** | **negative regulation of DNA-binding transcription factor activity** | **11/431** | **185/18723** | **0.00381100682340321** | **0.0482467436925698** | **0.0378417401247484** | **ZC3H12A/BHLHE40/TNFAIP3/NFKBIE/BCL3/PELI1/IRAK2/PIM1/NUPR1/PRNP/HMOX1** | **11** | **2** |
| **GO:0045860** | **BP** | **GO:0045860** | **positive regulation of protein kinase activity** | **18/431** | **386/18723** | **0.00382188476332932** | **0.0482467436925698** | **0.0378417401247484** | **EFNA1/EREG/TNF/SDC4/MAP2K3/PRKCD/BMP2/PRNP/TRAF4/EDN1/EMP2/STK4/VEGFA/IL6R/FGF18/TAOK1/IL18/CEMIP** | **18** | **2** |
| **GO:0009749** | **BP** | **GO:0009749** | **response to glucose** | **12/431** | **212/18723** | **0.00382252314107024** | **0.0482467436925698** | **0.0378417401247484** | **NR1D1/ICAM1/PIM3/SLC39A14/CASP3/XBP1/HMGCR/HIF1A/PFKFB2/SMARCA4/TXNIP/SYBU** | **12** | **2** |
| **GO:0048041** | **BP** | **GO:0048041** | **focal adhesion assembly** | **7/431** | **87/18723** | **0.00392179902518984** | **0.0493550380246114** | **0.0387110171553827** | **SDC4/PHLDB2/VEGFA/MACF1/DAPK3/RCC2/BCR** | **7** | **2** |
| **GO:0048511** | **BP** | **GO:0048511** | **rhythmic process** | **15/431** | **298/18723** | **0.00398147977534741** | **0.0498483820638383** | **0.0390979654858955** | **BHLHE40/EREG/KLF10/SETX/NR1D1/NFKB2/PER1/AHR/CASP3/NRIP1/PLEKHA1/HSPA5/ZP3/JUND/EGR3** | **15** | **2** |
| **GO:0061028** | **BP** | **GO:0061028** | **establishment of endothelial barrier** | **5/431** | **46/18723** | **0.00398416436569711** | **0.0498483820638383** | **0.0390979654858955** | **TNF/ICAM1/CLDN1/EZR/VEGFA** | **5** | **2** |
| **GO:0002687** | **BP** | **GO:0002687** | **positive regulation of leukocyte migration** | **9/431** | **135/18723** | **0.00407228476148406** | **0.0499637135943545** | **0.0391884243536233** | **CCL20/CXCL8/TNF/ICAM1/EDN1/ZP3/VEGFA/IL6R/SWAP70** | **9** | **2** |
| **GO:0032715** | **BP** | **GO:0032715** | **negative regulation of interleukin-6 production** | **6/431** | **66/18723** | **0.00407464299991134** | **0.0499637135943545** | **0.0391884243536233** | **ZC3H12A/TNF/TNFAIP3/KLF2/IL36RN/GBA** | **6** | **2** |
| **GO:0042093** | **BP** | **GO:0042093** | **T-helper cell differentiation** | **6/431** | **66/18723** | **0.00407464299991134** | **0.0499637135943545** | **0.0391884243536233** | **ZC3H12A/BCL3/NFKBIZ/STAT3/IL6R/IL18** | **6** | **2** |
| **GO:0042446** | **BP** | **GO:0042446** | **hormone biosynthetic process** | **6/431** | **66/18723** | **0.00407464299991134** | **0.0499637135943545** | **0.0391884243536233** | **NFKB1/ADM/AKR1B1/BMP2/HIF1A/DIO2** | **6** | **2** |
| **GO:0045600** | **BP** | **GO:0045600** | **positive regulation of fat cell differentiation** | **6/431** | **66/18723** | **0.00407464299991134** | **0.0499637135943545** | **0.0391884243536233** | **ZC3H12A/ZFP36/BMP2/PIM1/XBP1/STK4** | **6** | **2** |
| **GO:0051893** | **BP** | **GO:0051893** | **regulation of focal adhesion assembly** | **6/431** | **66/18723** | **0.00407464299991134** | **0.0499637135943545** | **0.0391884243536233** | **SDC4/PHLDB2/VEGFA/MACF1/DAPK3/RCC2** | **6** | **2** |
| **GO:0090109** | **BP** | **GO:0090109** | **regulation of cell-substrate junction assembly** | **6/431** | **66/18723** | **0.00407464299991134** | **0.0499637135943545** | **0.0391884243536233** | **SDC4/PHLDB2/VEGFA/MACF1/DAPK3/RCC2** | **6** | **2** |
| **GO:0005911** | **CC** | **GO:0005911** | **cell-cell junction** | **35/437** | **494/19550** | **2.00146395746752e-09** | **8.94654388987983e-07** | **7.98478778821254e-07** | **CLDN1/AMOTL2/YBX3/POF1B/PRKCD/AKR1B1/CXADR/TRIM29/EPHA2/NECTIN1/TRAF4/CLIC4/ATP1B1/PDZD2/CDSN/B4GALT1/NECTIN4/FRMD4B/SLC5A1/AHI1/AHNAK/GJB3/ASH1L/GJB2/VEGFA/SH3KBP1/SLC2A1/DSG1/EPPK1/CGNL1/SIPA1L3/STXBP6/PPL/PKP3/COL17A1** | **35** | **2** |
| **GO:0045178** | **CC** | **GO:0045178** | **basal part of cell** | **22/437** | **276/19550** | **2.92881253821284e-07** | **6.54589602290569e-05** | **5.84221027359297e-05** | **CLDN1/SLC3A2/CXADR/ATP1B3/SLC39A14/AQP9/ATP2B1/PHLDB2/EZR/RHCG/SLC11A2/ATP1B1/EDN1/B4GALT1/LDLR/ST14/GM2A/IDE/CD44/SLC2A1/EPPK1/SLC7A5** | **22** | **2** |
| **GO:0001533** | **CC** | **GO:0001533** | **cornified envelope** | **9/437** | **45/19550** | **5.57114633217216e-07** | **8.30100803493652e-05** | **7.40864722769561e-05** | **FLG/CDSN/FLG2/KRT2/TGM1/DSG1/IVL/PPL/PKP3** | **9** | **2** |
| **GO:0016323** | **CC** | **GO:0016323** | **basolateral plasma membrane** | **19/437** | **231/19550** | **1.18295488738066e-06** | **0.000132195208664789** | **0.000117984184820334** | **CLDN1/SLC3A2/CXADR/ATP1B3/SLC39A14/AQP9/ATP2B1/EZR/RHCG/ATP1B1/B4GALT1/LDLR/ST14/GM2A/IDE/CD44/SLC2A1/EPPK1/SLC7A5** | **19** | **2** |
| **GO:0009925** | **CC** | **GO:0009925** | **basal plasma membrane** | **19/437** | **257/19550** | **5.70586218435781e-06** | **0.000510104079281588** | **0.00045526774060455** | **CLDN1/SLC3A2/CXADR/ATP1B3/SLC39A14/AQP9/ATP2B1/EZR/RHCG/ATP1B1/B4GALT1/LDLR/ST14/GM2A/IDE/CD44/SLC2A1/EPPK1/SLC7A5** | **19** | **2** |
| **GO:0030057** | **CC** | **GO:0030057** | **desmosome** | **6/437** | **25/19550** | **1.48814328877961e-05** | **0.00110866675014081** | **0.000989484748153457** | **POF1B/CDSN/B4GALT1/DSG1/PPL/PKP3** | **6** | **2** |
| **GO:0070160** | **CC** | **GO:0070160** | **tight junction** | **12/437** | **129/19550** | **3.30850415254522e-05** | **0.0021127162231253** | **0.00188559860724005** | **CLDN1/AMOTL2/YBX3/POF1B/CXADR/EPHA2/TRAF4/FRMD4B/ASH1L/EPPK1/CGNL1/SIPA1L3** | **12** | **2** |
| **GO:0045177** | **CC** | **GO:0045177** | **apical part of cell** | **24/437** | **435/19550** | **4.95047162900237e-05** | **0.00276607602270507** | **0.00246872203604197** | **CLDN1/SLC3A2/ATP1B3/SLC39A14/ATP2B1/EZR/RHCG/CLIC4/SLC11A2/ATP1B1/EMP2/LDLR/SLC5A1/STK26/LMO7/GM2A/CD44/SLC26A9/IL6R/SLC2A1/MYO1B/SLC7A5/SIPA1L3/KCNK1** | **24** | **2** |
| **GO:0016324** | **CC** | **GO:0016324** | **apical plasma membrane** | **21/437** | **367/19550** | **8.73064609709098e-05** | **0.00423066999244367** | **0.00377587172291569** | **CLDN1/SLC3A2/ATP1B3/SLC39A14/ATP2B1/EZR/RHCG/SLC11A2/ATP1B1/EMP2/SLC5A1/STK26/LMO7/GM2A/CD44/SLC26A9/IL6R/SLC2A1/SLC7A5/SIPA1L3/KCNK1** | **21** | **2** |
| **GO:00300551** | **CC** | **GO:0030055** | **cell-substrate junction** | **23/437** | **425/19550** | **9.46458611284937e-05** | **0.00423066999244367** | **0.00377587172291569** | **SDC4/ICAM1/EPHA2/RND3/MARCKS/PHLDB2/EZR/ITGB8/G3BP1/HSP90B1/IGF2R/FLNC/HSPA5/AHNAK/LMO7/CD44/SH3KBP1/HSPA1B/GRB7/EPPK1/RRAS2/RALA/COL17A1** | **23** | **2** |
| **GO:0045121** | **CC** | **GO:0045121** | **membrane raft** | **19/437** | **335/19550** | **0.000209974962804714** | **0.0078215673644756** | **0.00698074657043742** | **TNF/SDC4/ICAM1/CD55/GNAI1/CXADR/ATP1B3/ATP2B1/CASP3/EZR/PRNP/ATP1B1/EMP2/BIRC3/AHNAK/HMOX1/CAVIN1/SLC2A1/DAPK3** | **19** | **2** |
| **GO:0098857** | **CC** | **GO:0098857** | **membrane microdomain** | **19/437** | **335/19550** | **0.000209974962804714** | **0.0078215673644756** | **0.00698074657043742** | **TNF/SDC4/ICAM1/CD55/GNAI1/CXADR/ATP1B3/ATP2B1/CASP3/EZR/PRNP/ATP1B1/EMP2/BIRC3/AHNAK/HMOX1/CAVIN1/SLC2A1/DAPK3** | **19** | **2** |
| **GO:0036464** | **CC** | **GO:0036464** | **cytoplasmic ribonucleoprotein granule** | **15/437** | **236/19550** | **0.000290933095703456** | **0.0100036225984188** | **0.00892823022442183** | **ZC3H12A/ZFP36/FLG/ZC3H12C/SQSTM1/NFKBIZ/G3BP1/SYNE1/YTHDF3/TRIM25/PCBP1/GRB7/CKAP4/MBNL1/TNRC6A** | **15** | **2** |
| **GO:0031253** | **CC** | **GO:0031253** | **cell projection membrane** | **19/437** | **346/19550** | **0.000315332475226189** | **0.0100681154590076** | **0.00898579008351321** | **ARL13B/EPHA2/ATP2B1/PIEZO1/EZR/EHD1/SLC28A3/SLC11A2/B4GALT1/SLC5A1/PLEKHA1/CD44/KANK1/PLCG2/MACF1/SLC7A5/EPS8L2/EPS8L1/KCNK1** | **19** | **2** |
| **GO:0005923** | **CC** | **GO:0005923** | **bicellular tight junction** | **10/437** | **122/19550** | **0.00041725485750617** | **0.0118659187078445** | **0.0105903289538986** | **CLDN1/AMOTL2/YBX3/POF1B/CXADR/TRAF4/FRMD4B/ASH1L/EPPK1/CGNL1** | **10** | **2** |
| **GO:0043296** | **CC** | **GO:0043296** | **apical junction complex** | **11/437** | **145/19550** | **0.000424730870974299** | **0.0118659187078445** | **0.0105903289538986** | **CLDN1/AMOTL2/YBX3/POF1B/CXADR/NECTIN1/TRAF4/FRMD4B/ASH1L/EPPK1/CGNL1** | **11** | **2** |
| **GO:00059251** | **CC** | **GO:0005925** | **focal adhesion** | **21/437** | **418/19550** | **0.00050895280451346** | **0.0133824649186774** | **0.0119438460006564** | **SDC4/ICAM1/EPHA2/RND3/MARCKS/PHLDB2/EZR/ITGB8/G3BP1/HSP90B1/IGF2R/FLNC/HSPA5/AHNAK/LMO7/CD44/SH3KBP1/HSPA1B/GRB7/RRAS2/RALA** | **21** | **2** |
| **GO:0005903** | **CC** | **GO:0005903** | **brush border** | **9/437** | **106/19550** | **0.000621960931226881** | **0.0148166513767971** | **0.013223856992361** | **SLC38A2/EZR/SLC28A3/SLC11A2/B4GALT1/RALGDS/SLC5A1/MYO1B/KCNK1** | **9** | **2** |
| **GO:0035770** | **CC** | **GO:0035770** | **ribonucleoprotein granule** | **15/437** | **254/19550** | **0.000629790550691598** | **0.0148166513767971** | **0.013223856992361** | **ZC3H12A/ZFP36/FLG/ZC3H12C/SQSTM1/NFKBIZ/G3BP1/SYNE1/YTHDF3/TRIM25/PCBP1/GRB7/CKAP4/MBNL1/TNRC6A** | **15** | **2** |
| **GO:0016607** | **CC** | **GO:0016607** | **nuclear speck** | **20/437** | **412/19550** | **0.00104581800876372** | **0.0233740324958691** | **0.0208613171221815** | **GADD45A/DUSP10/NOC3L/NFKBIZ/CBX4/NRIP1/USP36/SGK1/SRPK1/HIF1A/ATP6V0A1/RBBP6/SF3B2/PCBP1/AP5Z1/HSPA1B/CKAP4/CXXC1/TRIM69/SERPINB13** | **20** | **2** |
| **GO:0002178** | **CC** | **GO:0002178** | **palmitoyltransferase complex** | **3/437** | **11/19550** | **0.00160121889139982** | **0.0340830878312248** | **0.0304191458566683** | **SPTSSB/ZDHHC9/SPTSSA** | **3** | **2** |
| **GO:0032587** | **CC** | **GO:0032587** | **ruffle membrane** | **8/437** | **99/19550** | **0.00169881186827716** | **0.0345167684145404** | **0.0308062056496193** | **EPHA2/EZR/PLEKHA1/KANK1/PLCG2/MACF1/EPS8L2/EPS8L1** | **8** | **2** |
| **GO:0001726** | **CC** | **GO:0001726** | **ruffle** | **11/437** | **178/19550** | **0.00227037007195284** | **0.0441241487896921** | **0.0393807898064131** | **EPHA2/EZR/FRMD4B/PLEKHA1/CLIP1/MTSS1/KANK1/PLCG2/MACF1/EPS8L2/EPS8L1** | **11** | **2** |
| **GO:0031256** | **CC** | **GO:0031256** | **leading edge membrane** | **11/437** | **180/19550** | **0.00247683950176776** | **0.0461311357204246** | **0.041172025051315** | **EPHA2/ATP2B1/PIEZO1/EZR/PLEKHA1/CD44/KANK1/PLCG2/MACF1/EPS8L2/EPS8L1** | **11** | **2** |
| **GO:0001618** | **MF** | **GO:0001618** | **virus receptor activity** | **10/442** | **76/18368** | **1.35846473874821e-05** | **0.00332905256592203** | **0.00298169989745556** | **ICAM1/CLDN1/CD55/CXADR/EPHA2/NECTIN1/NECTIN4/LDLR/IDE/HSPA1B** | **10** | **2** |
| **GO:0140272** | **MF** | **GO:0140272** | **exogenous protein binding** | **10/442** | **77/18368** | **1.52816007311644e-05** | **0.00332905256592203** | **0.00298169989745556** | **ICAM1/CLDN1/CD55/CXADR/EPHA2/NECTIN1/NECTIN4/LDLR/IDE/HSPA1B** | **10** | **2** |
| **GO:0001221** | **MF** | **GO:0001221** | **transcription coregulator binding** | **10/442** | **78/18368** | **1.7157767338248e-05** | **0.00332905256592203** | **0.00298169989745556** | **NR1D1/PER1/NFATC1/AHR/UBE2I/MAFK/CHD4/HIF1A/SMARCA4/ZBTB7A** | **10** | **2** |
| **GO:0045296** | **MF** | **GO:0045296** | **cadherin binding** | **22/442** | **332/18368** | **1.94681436603628e-05** | **0.00332905256592203** | **0.00298169989745556** | **SLC3A2/TRIM29/EPHA2/PRDX6/PHLDB2/EZR/EHD1/GOLGA3/CEMIP2/HSPA5/TRIM25/AHNAK/PCBP1/MACF1/MYO1B/STXBP6/PPL/EPS8L2/SWAP70/EPS8L1/PKP3/SPTAN1** | **22** | **2** |
| **GO:0008330** | **MF** | **GO:0008330** | **protein tyrosine/threonine phosphatase activity** | **4/442** | **10/18368** | **6.19139773775696e-05** | **0.00846983210525152** | **0.00758609154394642** | **DUSP10/DUSP1/DUSP8/DUSP16** | **4** | **2** |
| **GO:0017017** | **MF** | **GO:0017017** | **MAP kinase tyrosine/serine/threonine phosphatase activity** | **4/442** | **13/18368** | **0.000199027383724712** | **0.0189692597986918** | **0.0169900110847009** | **DUSP10/DUSP1/DUSP8/DUSP16** | **4** | **2** |
| **GO:0001228** | **MF** | **GO:0001228** | **DNA-binding transcription activator activity, RNA polymerase II-specific** | **24/442** | **450/18368** | **0.000251328883865259** | **0.0189692597986918** | **0.0169900110847009** | **ELF3/REL/NFKB1/IRF1/KLF10/JUNB/NFKB2/NR4A1/NFATC1/CEBPD/ZNF292/KLF6/IRF6/GRHL1/BACH1/STAT3/DLX5/HIF1A/NFATC2/TFAP2A/JUND/MAFB/MITF/EGR3** | **24** | **2** |
| **GO:0035259** | **MF** | **GO:0035259** | **glucocorticoid receptor binding** | **4/442** | **14/18368** | **0.000273358995051326** | **0.0189692597986918** | **0.0169900110847009** | **NR4A1/ETS2/NRIP1/STAT3** | **4** | **2** |
| **GO:0035925** | **MF** | **GO:0035925** | **mRNA 3'-UTR AU-rich region binding** | **5/442** | **25/18368** | **0.000281479009288982** | **0.0189692597986918** | **0.0169900110847009** | **ZC3H12A/ZFP36/CPEB2/ZFP36L2/ELAVL3** | **5** | **2** |
| **GO:0051019** | **MF** | **GO:0051019** | **mitogen-activated protein kinase binding** | **5/442** | **25/18368** | **0.000281479009288982** | **0.0189692597986918** | **0.0169900110847009** | **DUSP10/DUSP1/NFATC1/TNIP1/GCH1** | **5** | **2** |
| **GO:0001216** | **MF** | **GO:0001216** | **DNA-binding transcription activator activity** | **24/442** | **456/18368** | **0.000305061195592997** | **0.0189692597986918** | **0.0169900110847009** | **ELF3/REL/NFKB1/IRF1/KLF10/JUNB/NFKB2/NR4A1/NFATC1/CEBPD/ZNF292/KLF6/IRF6/GRHL1/BACH1/STAT3/DLX5/HIF1A/NFATC2/TFAP2A/JUND/MAFB/MITF/EGR3** | **24** | **2** |
| **GO:0005149** | **MF** | **GO:0005149** | **interleukin-1 receptor binding** | **4/442** | **17/18368** | **0.00061375393336621** | **0.034983974201874** | **0.0313337534402749** | **IL1A/IL36G/IL1RN/IL36RN** | **4** | **2** |
| **GO:0033549** | **MF** | **GO:0033549** | **MAP kinase phosphatase activity** | **4/442** | **18/18368** | **0.000774209305178955** | **0.0407353203648004** | **0.0364850053128868** | **DUSP10/DUSP1/DUSP8/DUSP16** | **4** | **2** |
| **GO:0070888** | **MF** | **GO:0070888** | **E-box binding** | **6/442** | **48/18368** | **0.000978879815010223** | **0.0478252709619281** | **0.0428351919049586** | **BHLHE40/NR1D1/PER1/AHR/HIF1A/MITF** | **6** | **2** |
| **GO:00314241** | **BP** | **GO:0031424** | **keratinization** | **17/77** | **58/18723** | **7.17995109722916e-28** | **7.69690757622966e-25** | **7.5351697304605e-25** | **LCE3E/LCE3A/LCE2D/LCE2C/LCE2A/LCE1F/LCE1E/LCE1C/LCE1B/LCE1A/LCE6A/SPRR2B/SPRR2F/LCE3C/LCE2B/LCE1D/SPRR4** | **17** | **3** |
| **GO:00302161** | **BP** | **GO:0030216** | **keratinocyte differentiation** | **17/77** | **139/18723** | **7.77566913765906e-21** | **4.16775865778525e-18** | **4.08018006855057e-18** | **LCE3E/LCE3A/LCE2D/LCE2C/LCE2A/LCE1F/LCE1E/LCE1C/LCE1B/LCE1A/LCE6A/SPRR2B/SPRR2F/LCE3C/LCE2B/LCE1D/SPRR4** | **17** | **3** |
| **GO:00085442** | **BP** | **GO:0008544** | **epidermis development** | **20/77** | **324/18723** | **1.94778861443063e-18** | **6.9600979822321e-16** | **6.81384297749942e-16** | **LCE3E/LCE3A/LCE2D/LCE2C/LCE2A/LCE1F/LCE1E/LCE1C/LCE1B/LCE1A/LCE6A/SPRR2B/SPRR2F/LCE3C/LCE2B/C1orf68/LCE1D/SPRR4/HLA-DRB1/ALDH3A2** | **20** | **3** |
| **GO:00099131** | **BP** | **GO:0009913** | **epidermal cell differentiation** | **17/77** | **202/18723** | **5.1172292181668e-18** | **1.3714174304687e-15** | **1.34259935013482e-15** | **LCE3E/LCE3A/LCE2D/LCE2C/LCE2A/LCE1F/LCE1E/LCE1C/LCE1B/LCE1A/LCE6A/SPRR2B/SPRR2F/LCE3C/LCE2B/LCE1D/SPRR4** | **17** | **3** |
| **GO:00435882** | **BP** | **GO:0043588** | **skin development** | **18/77** | **263/18723** | **1.97249656841002e-17** | **4.22903264267109e-15** | **4.14016648148378e-15** | **LCE3E/LCE3A/LCE2D/LCE2C/LCE2A/LCE1F/LCE1E/LCE1C/LCE1B/LCE1A/LCE6A/SPRR2B/SPRR2F/LCE3C/LCE2B/ITGA2/LCE1D/SPRR4** | **18** | **3** |
| **GO:00015331** | **CC** | **GO:0001533** | **cornified envelope** | **4/67** | **45/19550** | **1.68856611410275e-05** | **0.00315761863337214** | **0.00284390082375199** | **SPRR2B/SPRR2F/PKP1/LCE1D** | **4** | **3** |
| **GO:0002181** | **BP** | **GO:0002181** | **cytoplasmic translation** | **16/185** | **148/18723** | **1.50635204714213e-12** | **4.24490006884653e-09** | **3.45826717349157e-09** | **RPL12/RPL36/RPL10/RPL36A/RPS17/RPL3/RPS4X/RPSA/RPS14/RPL5/RPLP0/RPL18A/RPS18/RPL31/RPS3A/RPL13A** | **16** | **4** |
| **GO:0052548** | **BP** | **GO:0052548** | **regulation of endopeptidase activity** | **20/185** | **432/18723** | **1.11797929126217e-08** | **1.29520545264469e-05** | **1.05518773755858e-05** | **CSTB/PI3/WFDC12/S100A8/GAPDH/SLPI/FAM162A/GPI/PERP/PSMB8/PLAUR/CTSD/SERPINB4/TIMP1/S100A9/CARD18/SPINK6/RPS27L/SERPINB9/CST7** | **20** | **4** |
| **GO:0019886** | **BP** | **GO:0019886** | **antigen processing and presentation of exogenous peptide antigen via MHC class II** | **7/185** | **30/18723** | **1.37885605320585e-08** | **1.29520545264469e-05** | **1.05518773755858e-05** | **CTSL/CTSD/CD74/HLA-DPB1/HLA-DRA/HLA-DPA1/B2M** | **7** | **4** |
| **GO:0052547** | **BP** | **GO:0052547** | **regulation of peptidase activity** | **20/185** | **461/18723** | **3.29316313536362e-08** | **1.98619001152939e-05** | **1.61812424457271e-05** | **CSTB/PI3/WFDC12/S100A8/GAPDH/SLPI/FAM162A/GPI/PERP/PSMB8/PLAUR/CTSD/SERPINB4/TIMP1/S100A9/CARD18/SPINK6/RPS27L/SERPINB9/CST7** | **20** | **4** |
| **GO:0002495** | **BP** | **GO:0002495** | **antigen processing and presentation of peptide antigen via MHC class II** | **7/185** | **34/18723** | **3.52411286644675e-08** | **1.98619001152939e-05** | **1.61812424457271e-05** | **CTSL/CTSD/CD74/HLA-DPB1/HLA-DRA/HLA-DPA1/B2M** | **7** | **4** |
| **GO:0002504** | **BP** | **GO:0002504** | **antigen processing and presentation of peptide or polysaccharide antigen via MHC class II** | **7/185** | **36/18723** | **5.37803570975412e-08** | **2.52588410501452e-05** | **2.05780629525855e-05** | **CTSL/CTSD/CD74/HLA-DPB1/HLA-DRA/HLA-DPA1/B2M** | **7** | **4** |
| **GO:0002478** | **BP** | **GO:0002478** | **antigen processing and presentation of exogenous peptide antigen** | **7/185** | **38/18723** | **7.99625716586451e-08** | **3.2190646704866e-05** | **2.62253186146624e-05** | **CTSL/CTSD/CD74/HLA-DPB1/HLA-DRA/HLA-DPA1/B2M** | **7** | **4** |
| **GO:0019882** | **BP** | **GO:0019882** | **antigen processing and presentation** | **10/185** | **106/18723** | **9.75301357934616e-08** | **3.43549903332469e-05** | **2.79885823902026e-05** | **CTSL/PSMB8/CTSD/CD74/HLA-DPB1/HLA-DRA/HLA-DPA1/B2M/CCR7/HLA-C** | **10** | **4** |
| **GO:0048002** | **BP** | **GO:0048002** | **antigen processing and presentation of peptide antigen** | **8/185** | **62/18723** | **1.67406324353518e-07** | **5.24167802253569e-05** | **4.27032974754412e-05** | **CTSL/CTSD/CD74/HLA-DPB1/HLA-DRA/HLA-DPA1/B2M/HLA-C** | **8** | **4** |
| **GO:0034109** | **BP** | **GO:0034109** | **homotypic cell-cell adhesion** | **9/185** | **90/18723** | **2.62179424125191e-07** | **7.3882161718479e-05** | **6.01908762123203e-05** | **ACTB/HBB/PLAUR/ACTG1/GNAS/LGALS1/CD99/RAP2B/FLNA** | **9** | **4** |
| **GO:0051238** | **BP** | **GO:0051238** | **sequestering of metal ion** | **5/185** | **16/18723** | **3.56801371030714e-07** | **8.68180886175858e-05** | **7.07296146109427e-05** | **FTL/S100A8/FTH1/S100A9/S100A7** | **5** | **4** |
| **GO:0019884** | **BP** | **GO:0019884** | **antigen processing and presentation of exogenous antigen** | **7/185** | **47/18723** | **3.69700874169989e-07** | **8.68180886175858e-05** | **7.07296146109427e-05** | **CTSL/CTSD/CD74/HLA-DPB1/HLA-DRA/HLA-DPA1/B2M** | **7** | **4** |
| **GO:00022621** | **BP** | **GO:0002262** | **myeloid cell homeostasis** | **11/185** | **157/18723** | **4.6589515426305e-07** | **0.000100991734208714** | **8.22767069998148e-05** | **ANXA1/ID2/RPS17/GPI/RPS14/CITED2/SOD1/ZFP36L1/HMGB2/B2M/TMEM14C** | **11** | **4** |
| **GO:0048872** | **BP** | **GO:0048872** | **homeostasis of number of cells** | **14/185** | **272/18723** | **5.56078626273197e-07** | **0.000111930683488419** | **9.11885326241986e-05** | **ANXA1/ID2/RPS17/GPI/RPS14/CITED2/CD74/SOD1/ZFP36L1/HMGB2/B2M/SOX4/CCR7/TMEM14C** | **14** | **4** |
| **GO:00085443** | **BP** | **GO:0008544** | **epidermis development** | **15/185** | **324/18723** | **8.30999187578469e-07** | **0.000156117047373075** | **0.000127186612498852** | **SPRR2D/SPRR2A/SPRR2G/KRT16/ANXA1/KRT17/KRT14/EMP1/SPRR1A/SOD1/ZFP36L1/S100A7/KRT5/DCT/KRT15** | **15** | **4** |
| **GO:0051346** | **BP** | **GO:0051346** | **negative regulation of hydrolase activity** | **16/185** | **379/18723** | **1.19547902742187e-06** | **0.000210553743704676** | **0.000171535510447835** | **CSTB/PI3/ANXA1/WFDC12/GAPDH/SLPI/GPI/PLAUR/ANGPTL4/SERPINB4/TIMP1/CARD18/SPINK6/LGALS3/SERPINB9/CST7** | **16** | **4** |
| **GO:0010951** | **BP** | **GO:0010951** | **negative regulation of endopeptidase activity** | **13/185** | **252/18723** | **1.39326763548146e-06** | **0.000230954599810985** | **0.000188155833621366** | **CSTB/PI3/WFDC12/GAPDH/SLPI/GPI/PLAUR/SERPINB4/TIMP1/CARD18/SPINK6/SERPINB9/CST7** | **13** | **4** |
| **GO:0045785** | **BP** | **GO:0045785** | **positive regulation of cell adhesion** | **17/185** | **437/18723** | **1.6800931479323e-06** | **0.000263027916159623** | **0.00021428556465733** | **ANXA1/S100A10/CITED2/PLAUR/CD74/VNN1/LGALS1/CEACAM6/HLA-DPB1/HLA-DRA/HLA-DPA1/B2M/SOX4/RHOD/TNFRSF18/CCR7/FLNA** | **17** | **4** |
| **GO:0010466** | **BP** | **GO:0010466** | **negative regulation of peptidase activity** | **13/185** | **262/18723** | **2.14698312126123e-06** | **0.000306297292682675** | **0.000249536586358714** | **CSTB/PI3/WFDC12/GAPDH/SLPI/GPI/PLAUR/SERPINB4/TIMP1/CARD18/SPINK6/SERPINB9/CST7** | **13** | **4** |
| **GO:00458611** | **BP** | **GO:0045861** | **negative regulation of proteolysis** | **15/185** | **351/18723** | **2.24663756264895e-06** | **0.000306297292682675** | **0.000249536586358714** | **CSTB/PI3/WFDC12/GAPDH/SLPI/GPI/SDCBP/PLAUR/RPL5/SERPINB4/TIMP1/CARD18/SPINK6/SERPINB9/CST7** | **15** | **4** |
| **GO:0042255** | **BP** | **GO:0042255** | **ribosome assembly** | **7/185** | **61/18723** | **2.28255612006251e-06** | **0.000306297292682675** | **0.000249536586358714** | **RPL10/RPL3/RPSA/RPS14/RPL5/RPLP0/RPS27L** | **7** | **4** |
| **GO:0001906** | **BP** | **GO:0001906** | **cell killing** | **11/185** | **188/18723** | **2.75658488728867e-06** | **0.000353093464199067** | **0.000287660843979741** | **DEFB4A/KRT6A/GAPDH/S100A12/DEFB103B/TYROBP/SERPINB4/HLA-DRA/B2M/SERPINB9/TUBB** | **11** | **4** |
| **GO:0019730** | **BP** | **GO:0019730** | **antimicrobial humoral response** | **9/185** | **122/18723** | **3.45343573202101e-06** | **0.000423120951862401** | **0.000344711365287773** | **DEFB4A/KRT6A/PI3/WFDC12/GAPDH/SLPI/S100A12/S100A9/S100A7** | **9** | **4** |
| **GO:00224091** | **BP** | **GO:0022409** | **positive regulation of cell-cell adhesion** | **13/185** | **284/18723** | **5.19414979335576e-06** | **0.000609879754903189** | **0.000496861434180216** | **ANXA1/CITED2/PLAUR/CD74/VNN1/LGALS1/CEACAM6/HLA-DPB1/HLA-DRA/HLA-DPA1/B2M/SOX4/CCR7** | **13** | **4** |
| **GO:00341011** | **BP** | **GO:0034101** | **erythrocyte homeostasis** | **9/185** | **129/18723** | **5.46891334553576e-06** | **0.00061645591230879** | **0.000502218947646884** | **ID2/RPS17/GPI/RPS14/CITED2/ZFP36L1/HMGB2/B2M/TMEM14C** | **9** | **4** |
| **GO:00302162** | **BP** | **GO:0030216** | **keratinocyte differentiation** | **9/185** | **139/18723** | **1.00491799628722e-05** | **0.00108917650520668** | **0.000887338522227701** | **SPRR2D/SPRR2A/SPRR2G/KRT16/ANXA1/KRT17/SPRR1A/ZFP36L1/S100A7** | **9** | **4** |
| **GO:0045104** | **BP** | **GO:0045104** | **intermediate filament cytoskeleton organization** | **6/185** | **51/18723** | **1.06821569790598e-05** | **0.00111490068025891** | **0.000908295686991401** | **KRT16/KRT17/KRT14/KRT6C/SOD1/VIM** | **6** | **4** |
| **GO:0045103** | **BP** | **GO:0045103** | **intermediate filament-based process** | **6/185** | **52/18723** | **1.19770849830518e-05** | **0.00120540805293714** | **0.0009820309153397** | **KRT16/KRT17/KRT14/KRT6C/SOD1/VIM** | **6** | **4** |
| **GO:00603261** | **BP** | **GO:0060326** | **cell chemotaxis** | **13/185** | **310/18723** | **1.32936998076194e-05** | **0.00129178089854729** | **0.00105239779602243** | **DEFB4A/ANXA1/MIF/S100A8/S100A12/TMSB4X/DEFB103B/CD74/HMGB2/S100A9/S100A7/LGALS3/CCR7** | **13** | **4** |
| **GO:0002399** | **BP** | **GO:0002399** | **MHC class II protein complex assembly** | **4/185** | **16/18723** | **1.53043060061271e-05** | **0.00130689497955352** | **0.00106471104942147** | **HLA-DPB1/HLA-DRA/HLA-DPA1/B2M** | **4** | **4** |
| **GO:0002503** | **BP** | **GO:0002503** | **peptide antigen assembly with MHC class II protein complex** | **4/185** | **16/18723** | **1.53043060061271e-05** | **0.00130689497955352** | **0.00106471104942147** | **HLA-DPB1/HLA-DRA/HLA-DPA1/B2M** | **4** | **4** |
| **GO:0017014** | **BP** | **GO:0017014** | **protein nitrosylation** | **4/185** | **16/18723** | **1.53043060061271e-05** | **0.00130689497955352** | **0.00106471104942147** | **S100A8/GAPDH/S100A9/TXN** | **4** | **4** |
| **GO:0018119** | **BP** | **GO:0018119** | **peptidyl-cysteine S-nitrosylation** | **4/185** | **16/18723** | **1.53043060061271e-05** | **0.00130689497955352** | **0.00106471104942147** | **S100A8/GAPDH/S100A9/TXN** | **4** | **4** |
| **GO:0097530** | **BP** | **GO:0097530** | **granulocyte migration** | **9/185** | **148/18723** | **1.66517766521868e-05** | **0.00131965678710151** | **0.00107510793495514** | **ANXA1/S100A8/S100A12/CD74/S100A9/S100A7/LGALS3/CCR7/CD99** | **9** | **4** |
| **GO:0006959** | **BP** | **GO:0006959** | **humoral immune response** | **13/185** | **317/18723** | **1.68328355486046e-05** | **0.00131965678710151** | **0.00107510793495514** | **DEFB4A/KRT6A/PI3/WFDC12/GAPDH/SLPI/S100A12/GPI/S100A9/S100A7/CCR7/CLU/KRT1** | **13** | **4** |
| **GO:00018191** | **BP** | **GO:0001819** | **positive regulation of cytokine production** | **16/185** | **467/18723** | **1.68586388699981e-05** | **0.00131965678710151** | **0.00107510793495514** | **ANXA1/MIF/GAPDH/IL1RL1/HILPDA/TYROBP/CD74/SOD1/HMGB2/TGFB1/HLA-DPB1/HLA-DPA1/B2M/CCR7/CLU/S100A13** | **16** | **4** |
| **GO:0098754** | **BP** | **GO:0098754** | **detoxification** | **9/185** | **152/18723** | **2.06024662982779e-05** | **0.00156912837914992** | **0.00127834933133838** | **HBB/MT1G/SOD1/GPX3/S100A9/GPX4/MGST1/TXN/MT2A** | **9** | **4** |
| **GO:00314242** | **BP** | **GO:0031424** | **keratinization** | **6/185** | **58/18723** | **2.26718087855752e-05** | **0.00164268329082292** | **0.00133827360101782** | **SPRR2D/SPRR2A/SPRR2G/KRT16/KRT17/SPRR1A** | **6** | **4** |
| **GO:2000116** | **BP** | **GO:2000116** | **regulation of cysteine-type endopeptidase activity** | **11/185** | **235/18723** | **2.28366170981708e-05** | **0.00164268329082292** | **0.00133827360101782** | **S100A8/FAM162A/GPI/PERP/PLAUR/CTSD/S100A9/CARD18/RPS27L/SERPINB9/CST7** | **11** | **4** |
| **GO:00512351** | **BP** | **GO:0051235** | **maintenance of location** | **13/185** | **327/18723** | **2.3317009096138e-05** | **0.00164268329082292** | **0.00133827360101782** | **FTL/ERO1A/S100A8/TMSB4X/TMSB10/FTH1/HILPDA/S100A9/S100A7/TSPO/TXN/CCR7/FLNA** | **13** | **4** |
| **GO:0002501** | **BP** | **GO:0002501** | **peptide antigen assembly with MHC protein complex** | **4/185** | **18/18723** | **2.53362687739088e-05** | **0.001741405009875** | **0.00141870095496521** | **HLA-DPB1/HLA-DRA/HLA-DPA1/B2M** | **4** | **4** |
| **GO:1902107** | **BP** | **GO:1902107** | **positive regulation of leukocyte differentiation** | **9/185** | **157/18723** | **2.66375878734084e-05** | **0.00174569122388988** | **0.00142219288009556** | **ANXA1/ID2/TYROBP/CD74/ZFP36L1/VNN1/TGFB1/HLA-DRA/SOX4** | **9** | **4** |
| **GO:1903708** | **BP** | **GO:1903708** | **positive regulation of hemopoiesis** | **9/185** | **157/18723** | **2.66375878734084e-05** | **0.00174569122388988** | **0.00142219288009556** | **ANXA1/ID2/TYROBP/CD74/ZFP36L1/VNN1/TGFB1/HLA-DRA/SOX4** | **9** | **4** |
| **GO:00971932** | **BP** | **GO:0097193** | **intrinsic apoptotic signaling pathway** | **12/185** | **288/18723** | **3.06253410721175e-05** | **0.00196141388957335** | **0.001597939446849** | **MIF/ERO1A/S100A8/BNIP3/PERP/PLAUR/CD74/SOD1/VNN1/S100A9/RPS27L/CLU** | **12** | **4** |
| **GO:0002396** | **BP** | **GO:0002396** | **MHC protein complex assembly** | **4/185** | **19/18723** | **3.184534454966e-05** | **0.00199422624313204** | **0.00162467126228792** | **HLA-DPB1/HLA-DRA/HLA-DPA1/B2M** | **4** | **4** |
| **GO:00444032** | **BP** | **GO:0044403** | **biological process involved in symbiotic interaction** | **12/185** | **290/18723** | **3.27666219902955e-05** | **0.00200731175584028** | **0.00163533186638065** | **KRT6A/GAPDH/CTSB/CTSL/IFI27/RPSA/DEFB103B/CD74/LGALS1/IFITM3/SERPINB9/LY6E** | **12** | **4** |
| **GO:00099132** | **BP** | **GO:0009913** | **epidermal cell differentiation** | **10/185** | **202/18723** | **3.36533971935677e-05** | **0.00201461650397806** | **0.00164128295363496** | **SPRR2D/SPRR2A/SPRR2G/KRT16/ANXA1/KRT17/SPRR1A/SOD1/ZFP36L1/S100A7** | **10** | **4** |
| **GO:00716211** | **BP** | **GO:0071621** | **granulocyte chemotaxis** | **8/185** | **125/18723** | **3.43156821117625e-05** | **0.00201461650397806** | **0.00164128295363496** | **ANXA1/S100A8/S100A12/CD74/S100A9/S100A7/LGALS3/CCR7** | **8** | **4** |
| **GO:00069791** | **BP** | **GO:0006979** | **response to oxidative stress** | **15/185** | **446/18723** | **3.85650694804034e-05** | **0.00221788501624034** | **0.00180688327683694** | **LDHA/ANXA1/ERO1A/BNIP3/HBB/SOD1/GPX3/VNN1/S100A7/GPX4/MGST1/TXN/NDUFS8/SELENOP/KRT1** | **15** | **4** |
| **GO:00224071** | **BP** | **GO:0022407** | **regulation of cell-cell adhesion** | **15/185** | **448/18723** | **4.05838807406675e-05** | **0.00228730751854402** | **0.0018634409241136** | **ANXA1/CITED2/PLAUR/CD74/VNN1/LGALS1/CEACAM6/TGFB1/HLA-DPB1/LGALS3/HLA-DRA/HLA-DPA1/B2M/SOX4/CCR7** | **15** | **4** |
| **GO:0042063** | **BP** | **GO:0042063** | **gliogenesis** | **12/185** | **301/18723** | **4.70279166468636e-05** | **0.00259852292374239** | **0.00211698423543467** | **ANXA1/NDRG1/S100A8/BNIP3/ID2/SOD1/S100A9/TGFB1/VIM/TSPO/SOX4/CLU** | **12** | **4** |
| **GO:1900118** | **BP** | **GO:1900118** | **negative regulation of execution phase of apoptosis** | **4/185** | **21/18723** | **4.84184833326727e-05** | **0.00262390934675907** | **0.00213766623782508** | **MTRNR2L12/MTRNR2L10/MTRNR2L8/MTRNR2L1** | **4** | **4** |
| **GO:0070527** | **BP** | **GO:0070527** | **platelet aggregation** | **6/185** | **67/18723** | **5.19370735187456e-05** | **0.00276148439954387** | **0.00224974691845848** | **ACTB/HBB/ACTG1/GNAS/RAP2B/FLNA** | **6** | **4** |
| **GO:0051651** | **BP** | **GO:0051651** | **maintenance of location in cell** | **10/185** | **214/18723** | **5.48338278061095e-05** | **0.00286151345847438** | **0.00233123934590887** | **FTL/ERO1A/S100A8/TMSB4X/TMSB10/FTH1/S100A9/TSPO/TXN/CCR7** | **10** | **4** |
| **GO:0031640** | **BP** | **GO:0031640** | **killing of cells of other organism** | **6/185** | **68/18723** | **5.65001394586634e-05** | **0.00289486169080933** | **0.00235840773510708** | **DEFB4A/KRT6A/GAPDH/S100A12/DEFB103B/SERPINB9** | **6** | **4** |
| **GO:0002696** | **BP** | **GO:0002696** | **positive regulation of leukocyte activation** | **14/185** | **409/18723** | **5.8217230755948e-05** | **0.00292957421911181** | **0.00238668759922411** | **ANXA1/MIF/IL1RL1/TYROBP/CD74/VNN1/LGALS1/TGFB1/HLA-DPB1/HLA-DRA/HLA-DPA1/B2M/SOX4/CCR7** | **14** | **4** |
| **GO:0050870** | **BP** | **GO:0050870** | **positive regulation of T cell activation** | **10/185** | **216/18723** | **5.92864306523521e-05** | **0.00293103792242681** | **0.0023878800600698** | **ANXA1/CD74/VNN1/LGALS1/HLA-DPB1/HLA-DRA/HLA-DPA1/B2M/SOX4/CCR7** | **10** | **4** |
| **GO:00435883** | **BP** | **GO:0043588** | **skin development** | **11/185** | **263/18723** | **6.36753279621946e-05** | **0.00308400627752496** | **0.00251250147222066** | **SPRR2D/SPRR2A/SPRR2G/ASPRV1/KRT16/ANXA1/KRT17/SPRR1A/ZFP36L1/S100A7/KRT1** | **11** | **4** |
| **GO:0098869** | **BP** | **GO:0098869** | **cellular oxidant detoxification** | **7/185** | **101/18723** | **6.4569329444277e-05** | **0.00308400627752496** | **0.00251250147222066** | **HBB/SOD1/GPX3/S100A9/GPX4/MGST1/TXN** | **7** | **4** |
| **GO:0051251** | **BP** | **GO:0051251** | **positive regulation of lymphocyte activation** | **13/185** | **362/18723** | **6.6360716681643e-05** | **0.00311674166014783** | **0.0025391705803976** | **ANXA1/MIF/TYROBP/CD74/VNN1/LGALS1/TGFB1/HLA-DPB1/HLA-DRA/HLA-DPA1/B2M/SOX4/CCR7** | **13** | **4** |
| **GO:0097529** | **BP** | **GO:0097529** | **myeloid leukocyte migration** | **10/185** | **220/18723** | **6.91213774100211e-05** | **0.0031554759808261** | **0.00257072694863163** | **ANXA1/MIF/S100A8/S100A12/CD74/S100A9/S100A7/LGALS3/CCR7/CD99** | **10** | **4** |
| **GO:0055076** | **BP** | **GO:0055076** | **transition metal ion homeostasis** | **8/185** | **138/18723** | **6.94249506072457e-05** | **0.0031554759808261** | **0.00257072694863163** | **FTL/S100A8/FTH1/MT1G/SOD1/S100A9/B2M/MT2A** | **8** | **4** |
| **GO:0007599** | **BP** | **GO:0007599** | **hemostasis** | **10/185** | **222/18723** | **7.45378790790029e-05** | **0.00333409116261318** | **0.00271624251079875** | **ANXA5/GPI/ACTB/HBB/PLAUR/ACTG1/GNAS/RAP2B/KRT1/FLNA** | **10** | **4** |
| **GO:0050867** | **BP** | **GO:0050867** | **positive regulation of cell activation** | **14/185** | **420/18723** | **7.72776548683675e-05** | **0.00335466414052152** | **0.0027330030594589** | **ANXA1/MIF/IL1RL1/TYROBP/CD74/VNN1/LGALS1/TGFB1/HLA-DPB1/HLA-DRA/HLA-DPA1/B2M/SOX4/CCR7** | **14** | **4** |
| **GO:00022741** | **BP** | **GO:0002274** | **myeloid leukocyte activation** | **10/185** | **223/18723** | **7.73786973505673e-05** | **0.00335466414052152** | **0.0027330030594589** | **NDRG1/MIF/S100A12/IL1RL1/MT1G/TYROBP/CD74/CLU/CST7/S100A13** | **10** | **4** |
| **GO:00420601** | **BP** | **GO:0042060** | **wound healing** | **14/185** | **422/18723** | **8.12735653663377e-05** | **0.00347013495761121** | **0.00282707569480036** | **KRT6A/ANXA1/S100A8/ANXA5/ACTB/HBB/PLAUR/ACTG1/GNAS/TIMP1/TGFB1/RAP2B/KRT1/FLNA** | **14** | **4** |
| **GO:0010001** | **BP** | **GO:0010001** | **glial cell differentiation** | **10/185** | **225/18723** | **8.33371221376251e-05** | **0.00350513448035564** | **0.00285558936971187** | **NDRG1/S100A8/BNIP3/ID2/SOD1/S100A9/TGFB1/VIM/SOX4/CLU** | **10** | **4** |
| **GO:00071591** | **BP** | **GO:0007159** | **leukocyte cell-cell adhesion** | **13/185** | **371/18723** | **8.50036235114035e-05** | **0.00352265016257552** | **0.00286985917768376** | **ANXA1/S100A8/CD74/VNN1/S100A9/LGALS1/HLA-DPB1/LGALS3/HLA-DRA/HLA-DPA1/B2M/SOX4/CCR7** | **13** | **4** |
| **GO:0033077** | **BP** | **GO:0033077** | **T cell differentiation in thymus** | **6/185** | **75/18723** | **9.81727814266598e-05** | **0.00400943330522213** | **0.00326643533625545** | **CD74/SOD1/ZFP36L1/VNN1/B2M/CCR7** | **6** | **4** |
| **GO:0046034** | **BP** | **GO:0046034** | **ATP metabolic process** | **11/185** | **277/18723** | **0.000101089158410226** | **0.00406956069142882** | **0.00331542036831133** | **LDHA/PGK1/ALDOA/GAPDH/TMSB4X/GPI/ATP5ME/TGFB1/TSPO/NDUFS8/NDUFV2** | **11** | **4** |
| **GO:00508631** | **BP** | **GO:0050863** | **regulation of T cell activation** | **12/185** | **329/18723** | **0.000109748068666788** | **0.00435591630285927** | **0.00354871071552653** | **ANXA1/CD74/SOD1/VNN1/LGALS1/HLA-DPB1/LGALS3/HLA-DRA/HLA-DPA1/B2M/SOX4/CCR7** | **12** | **4** |
| **GO:0019883** | **BP** | **GO:0019883** | **antigen processing and presentation of endogenous antigen** | **4/185** | **26/18723** | **0.000116363710500831** | **0.00455434633599085** | **0.00371036919009228** | **CD74/HLA-DRA/B2M/HLA-C** | **4** | **4** |
| **GO:0052372** | **BP** | **GO:0052372** | **modulation by symbiont of entry into host** | **5/185** | **49/18723** | **0.000119606307633846** | **0.00461713116318051** | **0.00376151920619203** | **KRT6A/CD74/LGALS1/IFITM3/LY6E** | **5** | **4** |
| **GO:00444091** | **BP** | **GO:0044409** | **entry into host** | **8/185** | **151/18723** | **0.000130301854079267** | **0.0048637584881936** | **0.00396244341367533** | **KRT6A/CTSB/CTSL/RPSA/CD74/LGALS1/IFITM3/LY6E** | **8** | **4** |
| **GO:00714561** | **BP** | **GO:0071456** | **cellular response to hypoxia** | **8/185** | **151/18723** | **0.000130301854079267** | **0.0048637584881936** | **0.00396244341367533** | **NDRG1/PGK1/ERO1A/BNIP3/FAM162A/CITED2/HILPDA/ZFP36L1** | **8** | **4** |
| **GO:0061844** | **BP** | **GO:0061844** | **antimicrobial humoral immune response mediated by antimicrobial peptide** | **6/185** | **79/18723** | **0.000131173046523319** | **0.0048637584881936** | **0.00396244341367533** | **DEFB4A/KRT6A/GAPDH/S100A12/S100A9/S100A7** | **6** | **4** |
| **GO:0000027** | **BP** | **GO:0000027** | **ribosomal large subunit assembly** | **4/185** | **27/18723** | **0.000135550876162879** | **0.00494950621562903** | **0.00403230101837321** | **RPL10/RPL3/RPL5/RPLP0** | **4** | **4** |
| **GO:19030391** | **BP** | **GO:1903039** | **positive regulation of leukocyte cell-cell adhesion** | **10/185** | **239/18723** | **0.000136998397735651** | **0.00494950621562903** | **0.00403230101837321** | **ANXA1/CD74/VNN1/LGALS1/HLA-DPB1/HLA-DRA/HLA-DPA1/B2M/SOX4/CCR7** | **10** | **4** |
| **GO:00075681** | **BP** | **GO:0007568** | **aging** | **12/185** | **339/18723** | **0.000145215824775832** | **0.0051601220729452** | **0.00420388713200608** | **KRT16/MIF/KRT14/ERO1A/ID2/CITED2/SOD1/TIMP1/GJB6/TSPO/GPX4/B2M** | **12** | **4** |
| **GO:0046916** | **BP** | **GO:0046916** | **cellular transition metal ion homeostasis** | **7/185** | **115/18723** | **0.000146490335640744** | **0.0051601220729452** | **0.00420388713200608** | **FTL/S100A8/FTH1/MT1G/SOD1/S100A9/MT2A** | **7** | **4** |
| **GO:0021782** | **BP** | **GO:0021782** | **glial cell development** | **7/185** | **116/18723** | **0.000154614406788138** | **0.00531345607718259** | **0.00432880643395287** | **NDRG1/S100A8/SOD1/S100A9/VIM/SOX4/CLU** | **7** | **4** |
| **GO:1990748** | **BP** | **GO:1990748** | **cellular detoxification** | **7/185** | **116/18723** | **0.000154614406788138** | **0.00531345607718259** | **0.00432880643395287** | **HBB/SOD1/GPX3/S100A9/GPX4/MGST1/TXN** | **7** | **4** |
| **GO:0048678** | **BP** | **GO:0048678** | **response to axon injury** | **6/185** | **83/18723** | **0.0001724098330648** | **0.00585362541658561** | **0.00476887566156408** | **BNIP3/TYROBP/SOD1/LGALS1/TSPO/FLNA** | **6** | **4** |
| **GO:1900117** | **BP** | **GO:1900117** | **regulation of execution phase of apoptosis** | **4/185** | **29/18723** | **0.000180637442502212** | **0.00605995610680038** | **0.00493697070297398** | **MTRNR2L12/MTRNR2L10/MTRNR2L8/MTRNR2L1** | **4** | **4** |
| **GO:00302181** | **BP** | **GO:0030218** | **erythrocyte differentiation** | **7/185** | **120/18723** | **0.000190842882699616** | **0.00631320674752406** | **0.00514329084320719** | **ID2/RPS14/CITED2/ZFP36L1/HMGB2/B2M/TMEM14C** | **7** | **4** |
| **GO:00517011** | **BP** | **GO:0051701** | **biological process involved in interaction with host** | **9/185** | **203/18723** | **0.000192667061847789** | **0.00631320674752406** | **0.00514329084320719** | **KRT6A/CTSB/CTSL/RPSA/CD74/LGALS1/IFITM3/SERPINB9/LY6E** | **9** | **4** |
| **GO:0036294** | **BP** | **GO:0036294** | **cellular response to decreased oxygen levels** | **8/185** | **161/18723** | **0.000202596744027107** | **0.0065622715479125** | **0.00534620083149571** | **NDRG1/PGK1/ERO1A/BNIP3/FAM162A/CITED2/HILPDA/ZFP36L1** | **8** | **4** |
| **GO:19902661** | **BP** | **GO:1990266** | **neutrophil migration** | **7/185** | **122/18723** | **0.000211369332878724** | **0.00676862250059367** | **0.0055143123804844** | **S100A8/S100A12/CD74/S100A9/LGALS3/CCR7/CD99** | **7** | **4** |
| **GO:20012421** | **BP** | **GO:2001242** | **regulation of intrinsic apoptotic signaling pathway** | **8/185** | **164/18723** | **0.000229786602579412** | **0.00727571512436835** | **0.00592743442017384** | **MIF/S100A8/PLAUR/CD74/SOD1/VNN1/S100A9/CLU** | **8** | **4** |
| **GO:0097237** | **BP** | **GO:0097237** | **cellular response to toxic substance** | **7/185** | **124/18723** | **0.00023364154925429** | **0.00731557650887322** | **0.00595990899325856** | **HBB/SOD1/GPX3/S100A9/GPX4/MGST1/TXN** | **7** | **4** |
| **GO:00302171** | **BP** | **GO:0030217** | **T cell differentiation** | **10/185** | **257/18723** | **0.000246476036789357** | **0.00763263155683965** | **0.00621820978875174** | **ANXA1/CTSL/CD74/SOD1/ZFP36L1/VNN1/HLA-DRA/B2M/SOX4/CCR7** | **10** | **4** |
| **GO:0002763** | **BP** | **GO:0002763** | **positive regulation of myeloid leukocyte differentiation** | **5/185** | **58/18723** | **0.000267511877801917** | **0.00810589754457851** | **0.00660377368971116** | **ID2/TYROBP/CD74/ZFP36L1/TGFB1** | **5** | **4** |
| **GO:0010043** | **BP** | **GO:0010043** | **response to zinc ion** | **5/185** | **58/18723** | **0.000267511877801917** | **0.00810589754457851** | **0.00660377368971116** | **KRT14/S100A8/MT1G/TSPO/MT2A** | **5** | **4** |
| **GO:00022371** | **BP** | **GO:0002237** | **response to molecule of bacterial origin** | **12/185** | **363/18723** | **0.000272467961763828** | **0.00816824166223902** | **0.00665456466525095** | **S100A8/SLPI/GJB6/HMGB2/S100A9/S100A7/TGFB1/VIM/TSPO/B2M/MGST1/CCR7** | **12** | **4** |
| **GO:19037062** | **BP** | **GO:1903706** | **regulation of hemopoiesis** | **12/185** | **367/18723** | **0.000300952576429049** | **0.00892720379344275** | **0.00727288165309426** | **ANXA1/ID2/TYROBP/CD74/SOD1/ZFP36L1/VNN1/HMGB2/TGFB1/HLA-DRA/B2M/SOX4** | **12** | **4** |
| **GO:0007596** | **BP** | **GO:0007596** | **blood coagulation** | **9/185** | **217/18723** | **0.000315824728126798** | **0.0092707717068887** | **0.00755278214961125** | **ANXA5/ACTB/HBB/PLAUR/ACTG1/GNAS/RAP2B/KRT1/FLNA** | **9** | **4** |
| **GO:00190581** | **BP** | **GO:0019058** | **viral life cycle** | **11/185** | **317/18723** | **0.000325490799835569** | **0.00945601107151167** | **0.00770369435096446** | **APOBEC3A/SLPI/CTSB/CTSL/IFI27/RPSA/CD74/APOBEC3B/LGALS1/IFITM3/LY6E** | **11** | **4** |
| **GO:19031312** | **BP** | **GO:1903131** | **mononuclear cell differentiation** | **13/185** | **426/18723** | **0.000329370448349168** | **0.00947108085150974** | **0.00771597151288437** | **ANXA1/ID2/CTSL/MT1G/CD74/SOD1/ZFP36L1/VNN1/LGALS1/HLA-DRA/B2M/SOX4/CCR7** | **13** | **4** |
| **GO:00456191** | **BP** | **GO:0045619** | **regulation of lymphocyte differentiation** | **8/185** | **174/18723** | **0.000342865259535607** | **0.0097595383976903** | **0.00795097428013991** | **ANXA1/ID2/CD74/SOD1/ZFP36L1/VNN1/HLA-DRA/SOX4** | **8** | **4** |
| **GO:00521261** | **BP** | **GO:0052126** | **movement in host environment** | **8/185** | **175/18723** | **0.000356306076660862** | **0.00986019657803923** | **0.0080329792449679** | **KRT6A/CTSB/CTSL/RPSA/CD74/LGALS1/IFITM3/LY6E** | **8** | **4** |
| **GO:00421102** | **BP** | **GO:0042110** | **T cell activation** | **14/185** | **487/18723** | **0.00035636753679199** | **0.00986019657803923** | **0.0080329792449679** | **ANXA1/CTSL/CD74/SOD1/ZFP36L1/VNN1/LGALS1/HLA-DPB1/LGALS3/HLA-DRA/HLA-DPA1/B2M/SOX4/CCR7** | **14** | **4** |
| **GO:00300981** | **BP** | **GO:0030098** | **lymphocyte differentiation** | **12/185** | **374/18723** | **0.000356898527665011** | **0.00986019657803923** | **0.0080329792449679** | **ANXA1/ID2/CTSL/CD74/SOD1/ZFP36L1/VNN1/LGALS1/HLA-DRA/B2M/SOX4/CCR7** | **12** | **4** |
| **GO:0046148** | **BP** | **GO:0046148** | **pigment biosynthetic process** | **5/185** | **62/18723** | **0.000365949982613023** | **0.0100121072912961** | **0.00815673900949417** | **TSPO/TYRP1/PMEL/DCT/TMEM14C** | **5** | **4** |
| **GO:0050817** | **BP** | **GO:0050817** | **coagulation** | **9/185** | **222/18723** | **0.000373162758864347** | **0.0100673493044932** | **0.00820174398905523** | **ANXA5/ACTB/HBB/PLAUR/ACTG1/GNAS/RAP2B/KRT1/FLNA** | **9** | **4** |
| **GO:0042552** | **BP** | **GO:0042552** | **myelination** | **7/185** | **134/18723** | **0.000375114150806171** | **0.0100673493044932** | **0.00820174398905523** | **NDRG1/KLK6/MALL/TYMP/SOD1/CLU/CST7** | **7** | **4** |
| **GO:0018149** | **BP** | **GO:0018149** | **peptide cross-linking** | **4/185** | **35/18723** | **0.00038023455108828** | **0.0101084996694979** | **0.00823526867848598** | **PI3/ANXA1/SPRR1A/KRT1** | **4** | **4** |
| **GO:0071453** | **BP** | **GO:0071453** | **cellular response to oxygen levels** | **8/185** | **177/18723** | **0.000384477125918644** | **0.0101257620639135** | **0.00824933213604096** | **NDRG1/PGK1/ERO1A/BNIP3/FAM162A/CITED2/HILPDA/ZFP36L1** | **8** | **4** |
| **GO:0002468** | **BP** | **GO:0002468** | **dendritic cell antigen processing and presentation** | **3/185** | **15/18723** | **0.000395685447310791** | **0.0103244591714982** | **0.00841120819283466** | **CD74/HLA-DRA/CCR7** | **3** | **4** |
| **GO:0007272** | **BP** | **GO:0007272** | **ensheathment of neurons** | **7/185** | **136/18723** | **0.000410271830172758** | **0.0105104183402439** | **0.00856270680963431** | **NDRG1/KLK6/MALL/TYMP/SOD1/CLU/CST7** | **7** | **4** |
| **GO:0008366** | **BP** | **GO:0008366** | **axon ensheathment** | **7/185** | **136/18723** | **0.000410271830172758** | **0.0105104183402439** | **0.00856270680963431** | **NDRG1/KLK6/MALL/TYMP/SOD1/CLU/CST7** | **7** | **4** |
| **GO:00300991** | **BP** | **GO:0030099** | **myeloid cell differentiation** | **12/185** | **381/18723** | **0.000421420857562324** | **0.0106987745640597** | **0.00871615827732032** | **ID2/RPS14/CITED2/MT1G/TYROBP/CD74/ZFP36L1/HMGB2/TGFB1/B2M/CCR7/TMEM14C** | **12** | **4** |
| **GO:0031341** | **BP** | **GO:0031341** | **regulation of cell killing** | **6/185** | **99/18723** | **0.00044937311465897** | **0.0113065485456159** | **0.00921130416420313** | **KRT6A/TYROBP/SERPINB4/HLA-DRA/B2M/SERPINB9** | **6** | **4** |
| **GO:19021051** | **BP** | **GO:1902105** | **regulation of leukocyte differentiation** | **10/185** | **279/18723** | **0.000471887824871621** | **0.0117679636326392** | **0.00958721328407085** | **ANXA1/ID2/TYROBP/CD74/SOD1/ZFP36L1/VNN1/TGFB1/HLA-DRA/SOX4** | **10** | **4** |
| **GO:0030595** | **BP** | **GO:0030595** | **leukocyte chemotaxis** | **9/185** | **230/18723** | **0.000482607247774646** | **0.0118934113688897** | **0.00968941399109053** | **ANXA1/MIF/S100A8/S100A12/CD74/S100A9/S100A7/LGALS3/CCR7** | **9** | **4** |
| **GO:0050918** | **BP** | **GO:0050918** | **positive chemotaxis** | **5/185** | **66/18723** | **0.000489579744070691** | **0.0118934113688897** | **0.00968941399109053** | **DEFB4A/MIF/DEFB103B/HMGB2/LGALS3** | **5** | **4** |
| **GO:2000272** | **BP** | **GO:2000272** | **negative regulation of signaling receptor activity** | **5/185** | **66/18723** | **0.000489579744070691** | **0.0118934113688897** | **0.00968941399109053** | **MTRNR2L12/MTRNR2L10/MTRNR2L8/MTRNR2L1/LY6E** | **5** | **4** |
| **GO:0034341** | **BP** | **GO:0034341** | **response to interferon-gamma** | **7/185** | **141/18723** | **0.000509781323374714** | **0.012278322814273** | **0.0100029965477306** | **GAPDH/ACTG1/CD74/VIM/IFITM3/HLA-DPA1/RPL13A** | **7** | **4** |
| **GO:0006882** | **BP** | **GO:0006882** | **cellular zinc ion homeostasis** | **4/185** | **38/18723** | **0.000523809336766567** | **0.0125092772119338** | **0.0101911522166626** | **S100A8/MT1G/S100A9/MT2A** | **4** | **4** |
| **GO:19030371** | **BP** | **GO:1903037** | **regulation of leukocyte cell-cell adhesion** | **11/185** | **336/18723** | **0.000530772847130223** | **0.0125542578913297** | **0.0102277974154832** | **ANXA1/CD74/VNN1/LGALS1/HLA-DPB1/LGALS3/HLA-DRA/HLA-DPA1/B2M/SOX4/CCR7** | **11** | **4** |
| **GO:0043123** | **BP** | **GO:0043123** | **positive regulation of I-kappaB kinase/NF-kappaB signaling** | **8/185** | **186/18723** | **0.000534602891043139** | **0.0125542578913297** | **0.0102277974154832** | **GAPDH/S100A12/S100A4/CD74/LGALS1/CCR7/FLNA/S100A13** | **8** | **4** |
| **GO:00305931** | **BP** | **GO:0030593** | **neutrophil chemotaxis** | **6/185** | **103/18723** | **0.000555089551272894** | **0.0128216586515329** | **0.0104456454816754** | **S100A8/S100A12/CD74/S100A9/LGALS3/CCR7** | **6** | **4** |
| **GO:00456391** | **BP** | **GO:0045639** | **positive regulation of myeloid cell differentiation** | **6/185** | **103/18723** | **0.000555089551272894** | **0.0128216586515329** | **0.0104456454816754** | **ID2/TYROBP/CD74/ZFP36L1/HMGB2/TGFB1** | **6** | **4** |
| **GO:00466861** | **BP** | **GO:0046686** | **response to cadmium ion** | **5/185** | **68/18723** | **0.000562045997377754** | **0.0128767936635001** | **0.0104905632886682** | **GPI/MT1G/SOD1/B2M/MT2A** | **5** | **4** |
| **GO:00467181** | **BP** | **GO:0046718** | **viral entry into host cell** | **7/185** | **144/18723** | **0.000578149451679043** | **0.0131389125389641** | **0.010704108269202** | **CTSB/CTSL/RPSA/CD74/LGALS1/IFITM3/LY6E** | **7** | **4** |
| **GO:00324961** | **BP** | **GO:0032496** | **response to lipopolysaccharide** | **11/185** | **343/18723** | **0.000629643907750914** | **0.0141946922563366** | **0.0115642388446715** | **S100A8/SLPI/GJB6/HMGB2/S100A9/S100A7/TGFB1/VIM/TSPO/MGST1/CCR7** | **11** | **4** |
| **GO:0055069** | **BP** | **GO:0055069** | **zinc ion homeostasis** | **4/185** | **40/18723** | **0.000638631242019127** | **0.0142293784487421** | **0.0115924972532616** | **S100A8/MT1G/S100A9/MT2A** | **4** | **4** |
| **GO:0002381** | **BP** | **GO:0002381** | **immunoglobulin production involved in immunoglobulin-mediated immune response** | **5/185** | **70/18723** | **0.000642281754344887** | **0.0142293784487421** | **0.0115924972532616** | **TGFB1/HLA-DPB1/HLA-DRA/HLA-DPA1/B2M** | **5** | **4** |
| **GO:0042116** | **BP** | **GO:0042116** | **macrophage activation** | **6/185** | **106/18723** | **0.000646330887664651** | **0.0142293784487421** | **0.0115924972532616** | **MIF/IL1RL1/TYROBP/CD74/CLU/CST7** | **6** | **4** |
| **GO:1903900** | **BP** | **GO:1903900** | **regulation of viral life cycle** | **7/185** | **148/18723** | **0.000680437939315245** | **0.014864140410778** | **0.0121096299114366** | **APOBEC3A/SLPI/CD74/APOBEC3B/LGALS1/IFITM3/LY6E** | **7** | **4** |
| **GO:0002544** | **BP** | **GO:0002544** | **chronic inflammatory response** | **3/185** | **18/18723** | **0.000694304743419134** | **0.0149355020378253** | **0.0121677673394707** | **S100A8/VNN1/S100A9** | **3** | **4** |
| **GO:0043217** | **BP** | **GO:0043217** | **myelin maintenance** | **3/185** | **18/18723** | **0.000694304743419134** | **0.0149355020378253** | **0.0121677673394707** | **NDRG1/SOD1/CLU** | **3** | **4** |
| **GO:0030330** | **BP** | **GO:0030330** | **DNA damage response, signal transduction by p53 class mediator** | **5/185** | **72/18723** | **0.000730803492185018** | **0.0154842424133638** | **0.0126148192833837** | **NDRG1/MIF/CD74/RPS27L/SOX4** | **5** | **4** |
| **GO:0043903** | **BP** | **GO:0043903** | **regulation of biological process involved in symbiotic interaction** | **5/185** | **72/18723** | **0.000730803492185018** | **0.0154842424133638** | **0.0126148192833837** | **KRT6A/CD74/LGALS1/IFITM3/LY6E** | **5** | **4** |
| **GO:0042742** | **BP** | **GO:0042742** | **defense response to bacterium** | **11/185** | **350/18723** | **0.000743429276887847** | **0.0156342067333578** | **0.0127369933455805** | **DEFB4A/KRT6A/PI3/WFDC12/S100A8/SLPI/S100A12/DEFB103B/HMGB2/S100A9/S100A7** | **11** | **4** |
| **GO:0046596** | **BP** | **GO:0046596** | **regulation of viral entry into host cell** | **4/185** | **42/18723** | **0.000770238019324438** | **0.0160780054700464** | **0.0130985506444179** | **CD74/LGALS1/IFITM3/LY6E** | **4** | **4** |
| **GO:0000028** | **BP** | **GO:0000028** | **ribosomal small subunit assembly** | **3/185** | **19/18723** | **0.000818515880707161** | **0.0168363339549838** | **0.0137163514085464** | **RPSA/RPS14/RPS27L** | **3** | **4** |
| **GO:0002483** | **BP** | **GO:0002483** | **antigen processing and presentation of endogenous peptide antigen** | **3/185** | **19/18723** | **0.000818515880707161** | **0.0168363339549838** | **0.0137163514085464** | **HLA-DRA/B2M/HLA-C** | **3** | **4** |
| **GO:0032930** | **BP** | **GO:0032930** | **positive regulation of superoxide anion generation** | **3/185** | **20/18723** | **0.000955989258569487** | **0.0195215777583247** | **0.015903986063616** | **TYROBP/SOD1/TGFB1** | **3** | **4** |
| **GO:00016661** | **BP** | **GO:0001666** | **response to hypoxia** | **10/185** | **307/18723** | **0.000984092583937462** | **0.0199508841837106** | **0.0162537366570814** | **LDHA/NDRG1/PGK1/ERO1A/BNIP3/FAM162A/CITED2/HILPDA/ZFP36L1/ANGPTL4** | **10** | **4** |
| **GO:0140694** | **BP** | **GO:0140694** | **non-membrane-bounded organelle assembly** | **11/185** | **367/18723** | **0.001092559034238** | **0.0219447161023798** | **0.0178780866681447** | **RPL10/FSCN1/RPL3/RPSA/RPS14/ACTG1/RPL5/RPLP0/RPS27L/TUBB/FLNA** | **11** | **4** |
| **GO:0002573** | **BP** | **GO:0002573** | **myeloid leukocyte differentiation** | **8/185** | **208/18723** | **0.00110667144883701** | **0.0219447161023798** | **0.0178780866681447** | **ID2/CITED2/MT1G/TYROBP/CD74/ZFP36L1/TGFB1/CCR7** | **8** | **4** |
| **GO:0150105** | **BP** | **GO:0150105** | **protein localization to cell-cell junction** | **3/185** | **21/18723** | **0.00110725105444229** | **0.0219447161023798** | **0.0178780866681447** | **ACTB/ACTG1/FLNA** | **3** | **4** |
| **GO:0001895** | **BP** | **GO:0001895** | **retina homeostasis** | **5/185** | **79/18723** | **0.00111358921314418** | **0.0219447161023798** | **0.0178780866681447** | **ACTB/ACTG1/SOD1/B2M/KRT1** | **5** | **4** |
| **GO:00321031** | **BP** | **GO:0032103** | **positive regulation of response to external stimulus** | **12/185** | **427/18723** | **0.0011400635132844** | **0.022029010893596** | **0.0179467605838156** | **S100A8/S100A12/TMSB4X/IL1RL1/TYROBP/CD74/HMGB2/S100A9/S100A7/TGFB1/CCR7/FLNA** | **12** | **4** |
| **GO:0043281** | **BP** | **GO:0043281** | **regulation of cysteine-type endopeptidase activity involved in apoptotic process** | **8/185** | **209/18723** | **0.00114119223033308** | **0.022029010893596** | **0.0179467605838156** | **S100A8/FAM162A/GPI/PLAUR/CTSD/S100A9/RPS27L/SERPINB9** | **8** | **4** |
| **GO:00509001** | **BP** | **GO:0050900** | **leukocyte migration** | **11/185** | **369/18723** | **0.00114131852039213** | **0.022029010893596** | **0.0179467605838156** | **ANXA1/MIF/S100A8/S100A12/CD74/S100A9/S100A7/LGALS3/TNFRSF18/CCR7/CD99** | **11** | **4** |
| **GO:0034250** | **BP** | **GO:0034250** | **positive regulation of cellular amide metabolic process** | **7/185** | **162/18723** | **0.00115613960046767** | **0.0221632747899177** | **0.0180561437065521** | **KRT17/RPS4X/RPL5/VIM/RPS27L/SOX4/CLU** | **7** | **4** |
| **GO:00026851** | **BP** | **GO:0002685** | **regulation of leukocyte migration** | **8/185** | **210/18723** | **0.00117656780968896** | **0.0224024870790776** | **0.0182510269767541** | **ANXA1/MIF/CD74/S100A7/LGALS3/TNFRSF18/CCR7/CD99** | **8** | **4** |
| **GO:0072331** | **BP** | **GO:0072331** | **signal transduction by p53 class mediator** | **7/185** | **163/18723** | **0.00119812747683907** | **0.0226598874478692** | **0.0184607278487179** | **NDRG1/MIF/PERP/CD74/RPL5/RPS27L/SOX4** | **7** | **4** |
| **GO:0009636** | **BP** | **GO:0009636** | **response to toxic substance** | **9/185** | **262/18723** | **0.00121524529818395** | **0.0228304083352157** | **0.0185996490900996** | **HBB/MT1G/SOD1/GPX3/S100A9/GPX4/MGST1/TXN/MT2A** | **9** | **4** |
| **GO:0050792** | **BP** | **GO:0050792** | **regulation of viral process** | **7/185** | **164/18723** | **0.00124130191072326** | **0.0229504546361853** | **0.0186974493151246** | **APOBEC3A/SLPI/CD74/APOBEC3B/LGALS1/IFITM3/LY6E** | **7** | **4** |
| **GO:00100381** | **BP** | **GO:0010038** | **response to metal ion** | **11/185** | **373/18723** | **0.00124423315352442** | **0.0229504546361853** | **0.0186974493151246** | **NDRG1/KRT14/S100A8/BNIP3/GPI/S100A16/MT1G/SOD1/TSPO/B2M/MT2A** | **11** | **4** |
| **GO:0006096** | **BP** | **GO:0006096** | **glycolytic process** | **5/185** | **81/18723** | **0.00124606797705335** | **0.0229504546361853** | **0.0186974493151246** | **LDHA/PGK1/ALDOA/GAPDH/GPI** | **5** | **4** |
| **GO:0090199** | **BP** | **GO:0090199** | **regulation of release of cytochrome c from mitochondria** | **4/185** | **48/18723** | **0.00127874006264407** | **0.0233992824450064** | **0.0190631037363412** | **BNIP3/FAM162A/PLAUR/CLU** | **4** | **4** |
| **GO:0001910** | **BP** | **GO:0001910** | **regulation of leukocyte mediated cytotoxicity** | **5/185** | **82/18723** | **0.00131651040886931** | **0.0237815790525238** | **0.0193745560171658** | **TYROBP/SERPINB4/HLA-DRA/B2M/SERPINB9** | **5** | **4** |
| **GO:0006757** | **BP** | **GO:0006757** | **ATP generation from ADP** | **5/185** | **82/18723** | **0.00131651040886931** | **0.0237815790525238** | **0.0193745560171658** | **LDHA/PGK1/ALDOA/GAPDH/GPI** | **5** | **4** |
| **GO:0018198** | **BP** | **GO:0018198** | **peptidyl-cysteine modification** | **4/185** | **49/18723** | **0.00138177417420054** | **0.0246445545752982** | **0.0200776114185967** | **S100A8/GAPDH/S100A9/TXN** | **4** | **4** |
| **GO:0050832** | **BP** | **GO:0050832** | **defense response to fungus** | **4/185** | **49/18723** | **0.00138177417420054** | **0.0246445545752982** | **0.0200776114185967** | **S100A8/GAPDH/S100A12/S100A9** | **4** | **4** |
| **GO:0030168** | **BP** | **GO:0030168** | **platelet activation** | **6/185** | **123/18723** | **0.00140280863435463** | **0.0247291968718226** | **0.0201465684425106** | **ACTB/HBB/ACTG1/GNAS/RAP2B/FLNA** | **6** | **4** |
| **GO:00362931** | **BP** | **GO:0036293** | **response to decreased oxygen levels** | **10/185** | **322/18723** | **0.00140703491521291** | **0.0247291968718226** | **0.0201465684425106** | **LDHA/NDRG1/PGK1/ERO1A/BNIP3/FAM162A/CITED2/HILPDA/ZFP36L1/ANGPTL4** | **10** | **4** |
| **GO:0050878** | **BP** | **GO:0050878** | **regulation of body fluid levels** | **11/185** | **379/18723** | **0.00141284623717652** | **0.0247291968718226** | **0.0201465684425106** | **KRT16/ANXA5/GPI/ACTB/HBB/PLAUR/ACTG1/GNAS/RAP2B/KRT1/FLNA** | **11** | **4** |
| **GO:0030325** | **BP** | **GO:0030325** | **adrenal gland development** | **3/185** | **23/18723** | **0.0014531486764264** | **0.0249496935954499** | **0.0203262043747623** | **CITED2/TSPO/LY6E** | **3** | **4** |
| **GO:0042438** | **BP** | **GO:0042438** | **melanin biosynthetic process** | **3/185** | **23/18723** | **0.0014531486764264** | **0.0249496935954499** | **0.0203262043747623** | **TYRP1/PMEL/DCT** | **3** | **4** |
| **GO:0001909** | **BP** | **GO:0001909** | **leukocyte mediated cytotoxicity** | **6/185** | **124/18723** | **0.00146225780817329** | **0.0249496935954499** | **0.0203262043747623** | **TYROBP/SERPINB4/HLA-DRA/B2M/SERPINB9/TUBB** | **6** | **4** |
| **GO:0042440** | **BP** | **GO:0042440** | **pigment metabolic process** | **5/185** | **84/18723** | **0.00146615930063633** | **0.0249496935954499** | **0.0203262043747623** | **TSPO/TYRP1/PMEL/DCT/TMEM14C** | **5** | **4** |
| **GO:0002443** | **BP** | **GO:0002443** | **leukocyte mediated immunity** | **12/185** | **440/18723** | **0.0014697122558001** | **0.0249496935954499** | **0.0203262043747623** | **TYROBP/CD74/SERPINB4/TGFB1/HLA-DPB1/HLA-DRA/HLA-DPA1/B2M/SERPINB9/CLU/TUBB/S100A13** | **12** | **4** |
| **GO:0022618** | **BP** | **GO:0022618** | **ribonucleoprotein complex assembly** | **8/185** | **220/18723** | **0.00158074297411296** | **0.0266738544973074** | **0.0217308567698732** | **RPL10/RPL3/RPSA/RPS14/RPL5/RPLP0/RPS27L/RPL13A** | **8** | **4** |
| **GO:2000117** | **BP** | **GO:2000117** | **negative regulation of cysteine-type endopeptidase activity** | **5/185** | **86/18723** | **0.00162797524921051** | **0.0267576186303371** | **0.0217990983649342** | **GPI/PLAUR/CARD18/SERPINB9/CST7** | **5** | **4** |
| **GO:00507271** | **BP** | **GO:0050727** | **regulation of inflammatory response** | **11/185** | **386/18723** | **0.00163284019450444** | **0.0267576186303371** | **0.0217990983649342** | **ANXA1/S100A8/S100A12/TMSB4X/IL1RL1/SOD1/S100A9/GPX4/CCR7/KRT1/CST7** | **11** | **4** |
| **GO:0006213** | **BP** | **GO:0006213** | **pyrimidine nucleoside metabolic process** | **3/185** | **24/18723** | **0.00164874211281888** | **0.0267576186303371** | **0.0217990983649342** | **APOBEC3A/TYMP/APOBEC3B** | **3** | **4** |
| **GO:0006582** | **BP** | **GO:0006582** | **melanin metabolic process** | **3/185** | **24/18723** | **0.00164874211281888** | **0.0267576186303371** | **0.0217990983649342** | **TYRP1/PMEL/DCT** | **3** | **4** |
| **GO:0032928** | **BP** | **GO:0032928** | **regulation of superoxide anion generation** | **3/185** | **24/18723** | **0.00164874211281888** | **0.0267576186303371** | **0.0217990983649342** | **TYROBP/SOD1/TGFB1** | **3** | **4** |
| **GO:0071294** | **BP** | **GO:0071294** | **cellular response to zinc ion** | **3/185** | **24/18723** | **0.00164874211281888** | **0.0267576186303371** | **0.0217990983649342** | **MT1G/TSPO/MT2A** | **3** | **4** |
| **GO:0035270** | **BP** | **GO:0035270** | **endocrine system development** | **6/185** | **127/18723** | **0.00165217375503146** | **0.0267576186303371** | **0.0217990983649342** | **ANXA1/CITED2/TSPO/SOX4/PITX1/LY6E** | **6** | **4** |
| **GO:0044550** | **BP** | **GO:0044550** | **secondary metabolite biosynthetic process** | **3/185** | **25/18723** | **0.0018600399651112** | **0.0297817762595646** | **0.0242628418893991** | **TYRP1/PMEL/DCT** | **3** | **4** |
| **GO:0045109** | **BP** | **GO:0045109** | **intermediate filament organization** | **3/185** | **25/18723** | **0.0018600399651112** | **0.0297817762595646** | **0.0242628418893991** | **KRT17/KRT14/VIM** | **3** | **4** |
| **GO:0071826** | **BP** | **GO:0071826** | **ribonucleoprotein complex subunit organization** | **8/185** | **227/18723** | **0.00192396738709352** | **0.0306312999820877** | **0.0249549382768418** | **RPL10/RPL3/RPSA/RPS14/RPL5/RPLP0/RPS27L/RPL13A** | **8** | **4** |
| **GO:0046031** | **BP** | **GO:0046031** | **ADP metabolic process** | **5/185** | **90/18723** | **0.00199044387748199** | **0.0315116339704733** | **0.0256721354038334** | **LDHA/PGK1/ALDOA/GAPDH/GPI** | **5** | **4** |
| **GO:00026971** | **BP** | **GO:0002697** | **regulation of immune effector process** | **10/185** | **339/18723** | **0.00205425008130197** | **0.0323400934587092** | **0.0263470710221675** | **ANXA1/GPI/TYROBP/CD74/SERPINB4/TGFB1/LGALS3/HLA-DRA/B2M/SERPINB9** | **10** | **4** |
| **GO:0009164** | **BP** | **GO:0009164** | **nucleoside catabolic process** | **3/185** | **26/18723** | **0.00208747599832125** | **0.0325328197440623** | **0.0265040827245153** | **APOBEC3A/GDA/APOBEC3B** | **3** | **4** |
| **GO:0045582** | **BP** | **GO:0045582** | **positive regulation of T cell differentiation** | **5/185** | **91/18723** | **0.00208958139591032** | **0.0325328197440623** | **0.0265040827245153** | **ANXA1/CD74/VNN1/HLA-DRA/SOX4** | **5** | **4** |
| **GO:00485251** | **BP** | **GO:0048525** | **negative regulation of viral process** | **5/185** | **92/18723** | **0.00219227517918861** | **0.0339441288733709** | **0.0276538586802219** | **APOBEC3A/SLPI/APOBEC3B/IFITM3/LY6E** | **5** | **4** |
| **GO:00026871** | **BP** | **GO:0002687** | **positive regulation of leukocyte migration** | **6/185** | **135/18723** | **0.00225053627376964** | **0.0345829169640962** | **0.0281742713752545** | **CD74/S100A7/LGALS3/TNFRSF18/CCR7/CD99** | **6** | **4** |
| **GO:0043388** | **BP** | **GO:0043388** | **positive regulation of DNA binding** | **4/185** | **56/18723** | **0.00227034763603896** | **0.0345829169640962** | **0.0281742713752545** | **PLAUR/HMGB2/TGFB1/TXN** | **4** | **4** |
| **GO:00450711** | **BP** | **GO:0045071** | **negative regulation of viral genome replication** | **4/185** | **56/18723** | **0.00227034763603896** | **0.0345829169640962** | **0.0281742713752545** | **APOBEC3A/SLPI/APOBEC3B/IFITM3** | **4** | **4** |
| **GO:0030336** | **BP** | **GO:0030336** | **negative regulation of cell migration** | **10/185** | **344/18723** | **0.00228462971242507** | **0.0346133684387841** | **0.0281990798121057** | **KRT16/MIF/CITED2/CD74/TIMP1/TGFB1/NDRG4/DNAJA4/RAP2B/SLURP1** | **10** | **4** |
| **GO:0071624** | **BP** | **GO:0071624** | **positive regulation of granulocyte chemotaxis** | **3/185** | **27/18723** | **0.00233146663859104** | **0.0350072278946443** | **0.0285199522013444** | **CD74/S100A7/CCR7** | **3** | **4** |
| **GO:0045727** | **BP** | **GO:0045727** | **positive regulation of translation** | **6/185** | **136/18723** | **0.00233547155578181** | **0.0350072278946443** | **0.0285199522013444** | **KRT17/RPS4X/RPL5/VIM/RPS27L/SOX4** | **6** | **4** |
| **GO:0045185** | **BP** | **GO:0045185** | **maintenance of protein location** | **5/185** | **94/18723** | **0.00240862920018664** | **0.0358897024230171** | **0.0292388931995817** | **TMSB4X/TMSB10/TSPO/TXN/FLNA** | **5** | **4** |
| **GO:0006754** | **BP** | **GO:0006754** | **ATP biosynthetic process** | **4/185** | **57/18723** | **0.00242309802552866** | **0.0358897024230171** | **0.0292388931995817** | **ALDOA/TMSB4X/ATP5ME/TGFB1** | **4** | **4** |
| **GO:00704821** | **BP** | **GO:0070482** | **response to oxygen levels** | **10/185** | **347/18723** | **0.00243255257728753** | **0.0358897024230171** | **0.0292388931995817** | **LDHA/NDRG1/PGK1/ERO1A/BNIP3/FAM162A/CITED2/HILPDA/ZFP36L1/ANGPTL4** | **10** | **4** |
| **GO:0002449** | **BP** | **GO:0002449** | **lymphocyte mediated immunity** | **10/185** | **350/18723** | **0.0025880795444633** | **0.0374636674622807** | **0.0305211828976259** | **CD74/SERPINB4/TGFB1/HLA-DPB1/HLA-DRA/HLA-DPA1/B2M/SERPINB9/CLU/TUBB** | **10** | **4** |
| **GO:0031342** | **BP** | **GO:0031342** | **negative regulation of cell killing** | **3/185** | **28/18723** | **0.00259241133965392** | **0.0374636674622807** | **0.0305211828976259** | **KRT6A/SERPINB4/SERPINB9** | **3** | **4** |
| **GO:0090200** | **BP** | **GO:0090200** | **positive regulation of release of cytochrome c from mitochondria** | **3/185** | **28/18723** | **0.00259241133965392** | **0.0374636674622807** | **0.0305211828976259** | **BNIP3/FAM162A/PLAUR** | **3** | **4** |
| **GO:1902624** | **BP** | **GO:1902624** | **positive regulation of neutrophil migration** | **3/185** | **28/18723** | **0.00259241133965392** | **0.0374636674622807** | **0.0305211828976259** | **CD74/CCR7/CD99** | **3** | **4** |
| **GO:0051604** | **BP** | **GO:0051604** | **protein maturation** | **9/185** | **294/18723** | **0.0026632607852379** | **0.0382911678204102** | **0.0311953371246179** | **ASPRV1/PGK1/ERO1A/KLK6/CTSL/PERP/CARD18/SOX4/CST7** | **9** | **4** |
| **GO:00018361** | **BP** | **GO:0001836** | **release of cytochrome c from mitochondria** | **4/185** | **59/18723** | **0.00274952070592081** | **0.0393307073567758** | **0.0320422370270547** | **BNIP3/FAM162A/PLAUR/CLU** | **4** | **4** |
| **GO:00160322** | **BP** | **GO:0016032** | **viral process** | **11/185** | **415/18723** | **0.00286325633291212** | **0.0402468294221744** | **0.032788590254291** | **APOBEC3A/SLPI/CTSB/CTSL/IFI27/RPSA/CD74/APOBEC3B/LGALS1/IFITM3/LY6E** | **11** | **4** |
| **GO:0051873** | **BP** | **GO:0051873** | **killing by host of symbiont cells** | **3/185** | **29/18723** | **0.00287069294317142** | **0.0402468294221744** | **0.032788590254291** | **KRT6A/GAPDH/DEFB103B** | **3** | **4** |
| **GO:0051883** | **BP** | **GO:0051883** | **killing of cells in other organism involved in symbiotic interaction** | **3/185** | **29/18723** | **0.00287069294317142** | **0.0402468294221744** | **0.032788590254291** | **KRT6A/GAPDH/DEFB103B** | **3** | **4** |
| **GO:1902230** | **BP** | **GO:1902230** | **negative regulation of intrinsic apoptotic signaling pathway in response to DNA damage** | **3/185** | **29/18723** | **0.00287069294317142** | **0.0402468294221744** | **0.032788590254291** | **MIF/CD74/CLU** | **3** | **4** |
| **GO:20012432** | **BP** | **GO:2001243** | **negative regulation of intrinsic apoptotic signaling pathway** | **5/185** | **98/18723** | **0.00288729336729169** | **0.0402791718268712** | **0.03281493920825** | **MIF/PLAUR/CD74/VNN1/CLU** | **5** | **4** |
| **GO:20012332** | **BP** | **GO:2001233** | **regulation of apoptotic signaling pathway** | **10/185** | **356/18723** | **0.00292306366109406** | **0.0403844211759589** | **0.0329006845410206** | **MIF/S100A8/PLAUR/CD74/SOD1/VNN1/HMGB2/S100A9/LGALS3/CLU** | **10** | **4** |
| **GO:0009620** | **BP** | **GO:0009620** | **response to fungus** | **4/185** | **60/18723** | **0.00292349961671243** | **0.0403844211759589** | **0.0329006845410206** | **S100A8/GAPDH/S100A12/S100A9** | **4** | **4** |
| **GO:0050821** | **BP** | **GO:0050821** | **protein stabilization** | **7/185** | **191/18723** | **0.00294479555511996** | **0.0404801652406246** | **0.0329786860370558** | **GAPDH/PFN1/TYROBP/RPL5/SOX4/CLU/FLNA** | **7** | **4** |
| **GO:0006165** | **BP** | **GO:0006165** | **nucleoside diphosphate phosphorylation** | **5/185** | **99/18723** | **0.00301696997647428** | **0.0412709776393424** | **0.0336229510408299** | **LDHA/PGK1/ALDOA/GAPDH/GPI** | **5** | **4** |
| **GO:2000146** | **BP** | **GO:2000146** | **negative regulation of cell motility** | **10/185** | **359/18723** | **0.0031030921081955** | **0.0420648712933516** | **0.0342697263048821** | **KRT16/MIF/CITED2/CD74/TIMP1/TGFB1/NDRG4/DNAJA4/RAP2B/SLURP1** | **10** | **4** |
| **GO:0043030** | **BP** | **GO:0043030** | **regulation of macrophage activation** | **4/185** | **61/18723** | **0.00310485920121261** | **0.0420648712933516** | **0.0342697263048821** | **MIF/IL1RL1/CD74/CST7** | **4** | **4** |
| **GO:0046939** | **BP** | **GO:0046939** | **nucleotide phosphorylation** | **5/185** | **101/18723** | **0.00328885999432409** | **0.0441769621843439** | **0.0359904204266012** | **LDHA/PGK1/ALDOA/GAPDH/GPI** | **5** | **4** |
| **GO:0009116** | **BP** | **GO:0009116** | **nucleoside metabolic process** | **4/185** | **62/18723** | **0.00329374949215051** | **0.0441769621843439** | **0.0359904204266012** | **APOBEC3A/GDA/TYMP/APOBEC3B** | **4** | **4** |
| **GO:00425421** | **BP** | **GO:0042542** | **response to hydrogen peroxide** | **6/185** | **146/18723** | **0.00332346202380444** | **0.0441769621843439** | **0.0359904204266012** | **LDHA/ANXA1/BNIP3/HBB/SOD1/TXN** | **6** | **4** |
| **GO:00455801** | **BP** | **GO:0045580** | **regulation of T cell differentiation** | **6/185** | **146/18723** | **0.00332346202380444** | **0.0441769621843439** | **0.0359904204266012** | **ANXA1/CD74/SOD1/VNN1/HLA-DRA/SOX4** | **6** | **4** |
| **GO:0051098** | **BP** | **GO:0051098** | **regulation of binding** | **10/185** | **363/18723** | **0.00335678697372706** | **0.0444104492580416** | **0.0361806394351308** | **S100A10/SLPI/TMSB4X/ACTB/PLAUR/HMGB2/CARD18/TGFB1/B2M/TXN** | **10** | **4** |
| **GO:00431221** | **BP** | **GO:0043122** | **regulation of I-kappaB kinase/NF-kappaB signaling** | **8/185** | **249/18723** | **0.00339812418860513** | **0.0447472615116321** | **0.0364550361797727** | **GAPDH/S100A12/S100A4/CD74/LGALS1/CCR7/FLNA/S100A13** | **8** | **4** |
| **GO:0001516** | **BP** | **GO:0001516** | **prostaglandin biosynthetic process** | **3/185** | **31/18723** | **0.00348071728368807** | **0.0452012041725022** | **0.0368248576071971** | **ANXA1/MIF/CD74** | **3** | **4** |
| **GO:0034656** | **BP** | **GO:0034656** | **nucleobase-containing small molecule catabolic process** | **3/185** | **31/18723** | **0.00348071728368807** | **0.0452012041725022** | **0.0368248576071971** | **APOBEC3A/GDA/APOBEC3B** | **3** | **4** |
| **GO:0046457** | **BP** | **GO:0046457** | **prostanoid biosynthetic process** | **3/185** | **31/18723** | **0.00348071728368807** | **0.0452012041725022** | **0.0368248576071971** | **ANXA1/MIF/CD74** | **3** | **4** |
| **GO:2001056** | **BP** | **GO:2001056** | **positive regulation of cysteine-type endopeptidase activity** | **6/185** | **148/18723** | **0.0035535499956669** | **0.045830473738455** | **0.0373375156787458** | **S100A8/FAM162A/PERP/CTSD/S100A9/RPS27L** | **6** | **4** |
| **GO:0009135** | **BP** | **GO:0009135** | **purine nucleoside diphosphate metabolic process** | **5/185** | **103/18723** | **0.00357796459278215** | **0.045830473738455** | **0.0373375156787458** | **LDHA/PGK1/ALDOA/GAPDH/GPI** | **5** | **4** |
| **GO:0009179** | **BP** | **GO:0009179** | **purine ribonucleoside diphosphate metabolic process** | **5/185** | **103/18723** | **0.00357796459278215** | **0.045830473738455** | **0.0373375156787458** | **LDHA/PGK1/ALDOA/GAPDH/GPI** | **5** | **4** |
| **GO:0051271** | **BP** | **GO:0051271** | **negative regulation of cellular component movement** | **10/185** | **367/18723** | **0.0036267387025006** | **0.0462450211024738** | **0.037675242248887** | **KRT16/MIF/CITED2/CD74/TIMP1/TGFB1/NDRG4/DNAJA4/RAP2B/SLURP1** | **10** | **4** |
| **GO:0032963** | **BP** | **GO:0032963** | **collagen metabolic process** | **5/185** | **104/18723** | **0.003729159180348** | **0.0471245317050254** | **0.0383917685737031** | **KLK6/CTSB/CTSL/TGFB1/VIM** | **5** | **4** |
| **GO:0045621** | **BP** | **GO:0045621** | **positive regulation of lymphocyte differentiation** | **5/185** | **104/18723** | **0.003729159180348** | **0.0471245317050254** | **0.0383917685737031** | **ANXA1/CD74/VNN1/HLA-DRA/SOX4** | **5** | **4** |
| **GO:00452161** | **BP** | **GO:0045216** | **cell-cell junction organization** | **7/185** | **200/18723** | **0.00379522169033349** | **0.0475462162472781** | **0.0387353097139866** | **FSCN1/ACTB/PERP/ACTG1/GJB6/TGFB1/FLNA** | **7** | **4** |
| **GO:0030511** | **BP** | **GO:0030511** | **positive regulation of transforming growth factor beta receptor signaling pathway** | **3/185** | **32/18723** | **0.00381314580265609** | **0.0475462162472781** | **0.0387353097139866** | **SDCBP/CITED2/CDKN1C** | **3** | **4** |
| **GO:1903846** | **BP** | **GO:1903846** | **positive regulation of cellular response to transforming growth factor beta stimulus** | **3/185** | **32/18723** | **0.00381314580265609** | **0.0475462162472781** | **0.0387353097139866** | **SDCBP/CITED2/CDKN1C** | **3** | **4** |
| **GO:0032507** | **BP** | **GO:0032507** | **maintenance of protein location in cell** | **4/185** | **65/18723** | **0.00390708321991518** | **0.0485029097520748** | **0.0395147159871783** | **TMSB4X/TMSB10/TSPO/TXN** | **4** | **4** |
| **GO:00026831** | **BP** | **GO:0002683** | **negative regulation of immune system process** | **11/185** | **434/18723** | **0.00401387092727163** | **0.0491353001103635** | **0.0400299165293425** | **ANXA1/MIF/ID2/IL1RL1/TYROBP/CD74/SERPINB4/TGFB1/LGALS3/SERPINB9/CST7** | **11** | **4** |
| **GO:0006090** | **BP** | **GO:0006090** | **pyruvate metabolic process** | **5/185** | **106/18723** | **0.00404520568687165** | **0.0491353001103635** | **0.0400299165293425** | **LDHA/PGK1/ALDOA/GAPDH/GPI** | **5** | **4** |
| **GO:0009185** | **BP** | **GO:0009185** | **ribonucleoside diphosphate metabolic process** | **5/185** | **106/18723** | **0.00404520568687165** | **0.0491353001103635** | **0.0400299165293425** | **LDHA/PGK1/ALDOA/GAPDH/GPI** | **5** | **4** |
| **GO:0035821** | **BP** | **GO:0035821** | **modulation of process of other organism** | **5/185** | **106/18723** | **0.00404520568687165** | **0.0491353001103635** | **0.0400299165293425** | **KRT6A/SLPI/IFI27/S100A9/SERPINB9** | **5** | **4** |
| **GO:0071887** | **BP** | **GO:0071887** | **leukocyte apoptotic process** | **5/185** | **106/18723** | **0.00404520568687165** | **0.0491353001103635** | **0.0400299165293425** | **ANXA1/CTSL/CD74/LGALS3/CCR7** | **5** | **4** |
| **GO:0022626** | **CC** | **GO:0022626** | **cytosolic ribosome** | **17/189** | **102/19550** | **1.27304005794793e-16** | **3.42447775587992e-14** | **2.25127083931844e-14** | **RPL12/RPL36/RPL10/RPL36A/RPS17/RPL3/RPS4X/RPSA/RPS14/RPL5/RPLP0/RPL18A/RPS18/RPL31/RPS3A/RPS27L/RPL13A** | **17** | **4** |
| **GO:0044391** | **CC** | **GO:0044391** | **ribosomal subunit** | **19/189** | **180/19550** | **1.18611422006876e-14** | **1.59532362599249e-12** | **1.04877467879764e-12** | **RPL12/RPL36/RPL10/RPL36A/RPS17/RPL3/RPS4X/RPSA/RPS14/RPL5/RPLP0/RPL18A/RPS18/RPL31/RPS3A/RPS27L/RPL13A/MRPL41/MRPL52** | **19** | **4** |
| **GO:00059252** | **CC** | **GO:0005925** | **focal adhesion** | **25/189** | **418/19550** | **3.5084381053596e-13** | **3.14589950113911e-11** | **2.06813193579092e-11** | **ANXA1/ANXA5/RPL12/RPS17/IL1RL1/ACTB/RPL3/RPS4X/SDCBP/RPS14/PFN1/PLAUR/ACTG1/RPL5/RPLP0/RPS18/S100A7/VIM/RPL31/RPS3A/RPL13A/B2M/FBLIM1/CD99/FLNA** | **25** | **4** |
| **GO:00300552** | **CC** | **GO:0030055** | **cell-substrate junction** | **25/189** | **425/19550** | **5.07887136662685e-13** | **3.41554099405655e-11** | **2.24539576208766e-11** | **ANXA1/ANXA5/RPL12/RPS17/IL1RL1/ACTB/RPL3/RPS4X/SDCBP/RPS14/PFN1/PLAUR/ACTG1/RPL5/RPLP0/RPS18/S100A7/VIM/RPL31/RPS3A/RPL13A/B2M/FBLIM1/CD99/FLNA** | **25** | **4** |
| **GO:0005840** | **CC** | **GO:0005840** | **ribosome** | **19/189** | **240/19550** | **2.18926010459048e-12** | **1.17782193626968e-10** | **7.74306731728842e-11** | **RPL12/RPL36/RPL10/RPL36A/RPS17/RPL3/RPS4X/RPSA/RPS14/RPL5/RPLP0/RPL18A/RPS18/RPL31/RPS3A/RPS27L/RPL13A/MRPL41/MRPL52** | **19** | **4** |
| **GO:0034774** | **CC** | **GO:0034774** | **secretory granule lumen** | **20/189** | **322/19550** | **4.75814240956439e-11** | **2.10813728156432e-09** | **1.38590124555980e-09** | **CSTB/FTL/MIF/ALDOA/S100A8/SLPI/S100A12/S100P/TMSB4X/GPI/SDCBP/CTSD/TIMP1/S100A9/S100A7/TGFB1/B2M/SELENOP/CLU/TUBB** | **20** | **4** |
| **GO:0060205** | **CC** | **GO:0060205** | **cytoplasmic vesicle lumen** | **20/189** | **325/19550** | **5.61797506084106e-11** | **2.10813728156432e-09** | **1.38590124555980e-09** | **CSTB/FTL/MIF/ALDOA/S100A8/SLPI/S100A12/S100P/TMSB4X/GPI/SDCBP/CTSD/TIMP1/S100A9/S100A7/TGFB1/B2M/SELENOP/CLU/TUBB** | **20** | **4** |
| **GO:0031983** | **CC** | **GO:0031983** | **vesicle lumen** | **20/189** | **327/19550** | **6.26955325372288e-11** | **2.10813728156432e-09** | **1.38590124555980e-09** | **CSTB/FTL/MIF/ALDOA/S100A8/SLPI/S100A12/S100P/TMSB4X/GPI/SDCBP/CTSD/TIMP1/S100A9/S100A7/TGFB1/B2M/SELENOP/CLU/TUBB** | **20** | **4** |
| **GO:0062023** | **CC** | **GO:0062023** | **collagen-containing extracellular matrix** | **22/189** | **425/19550** | **1.6471250497165e-10** | **4.9230737597082e-09** | **3.23645623803943e-09** | **CSTB/ANXA1/S100A8/S100A10/ANXA5/SLPI/CTSB/S100A6/CTSL/S100A4/CTSD/ANGPTL4/TIMP1/S100A9/LGALS1/S100A7/TGFB1/LGALS3/SERPINB9/IGFBP7/CLU/KRT1** | **22** | **4** |
| **GO:0022625** | **CC** | **GO:0022625** | **cytosolic large ribosomal subunit** | **10/189** | **58/19550** | **1.95992246684108e-10** | **5.27219143580251e-09** | **3.46596815188739e-09** | **RPL12/RPL36/RPL10/RPL36A/RPL3/RPL5/RPLP0/RPL18A/RPL31/RPL13A** | **10** | **4** |
| **GO:0015934** | **CC** | **GO:0015934** | **large ribosomal subunit** | **12/189** | **113/19550** | **9.90901754504796e-10** | **2.42320519965264e-08** | **1.59302865795986e-08** | **RPL12/RPL36/RPL10/RPL36A/RPL3/RPL5/RPLP0/RPL18A/RPL31/RPL13A/MRPL41/MRPL52** | **12** | **4** |
| **GO:00015332** | **CC** | **GO:0001533** | **cornified envelope** | **8/189** | **45/19550** | **1.04421371289797e-08** | **2.34077907307961e-07** | **1.53884126111279e-07** | **SPRR2D/SPRR2A/SPRR2G/PI3/ANXA1/DSG3/SPRR1A/KRT1** | **8** | **4** |
| **GO:0042611** | **CC** | **GO:0042611** | **MHC protein complex** | **6/189** | **25/19550** | **1.1460859047342e-07** | **2.37151621825769e-06** | **1.55904803235098e-06** | **CD74/HLA-DPB1/HLA-DRA/HLA-DPA1/B2M/HLA-C** | **6** | **4** |
| **GO:0022627** | **CC** | **GO:0022627** | **cytosolic small ribosomal subunit** | **7/189** | **42/19550** | **1.43114743841908e-07** | **2.74984757810523e-06** | **1.80776518537147e-06** | **RPS17/RPS4X/RPSA/RPS14/RPS18/RPS3A/RPS27L** | **7** | **4** |
| **GO:0042613** | **CC** | **GO:0042613** | **MHC class II protein complex** | **5/189** | **17/19550** | **4.5100330806715e-07** | **8.08799265800423e-06** | **5.31709163194956e-06** | **CD74/HLA-DPB1/HLA-DRA/HLA-DPA1/B2M** | **5** | **4** |
| **GO:1904813** | **CC** | **GO:1904813** | **ficolin-1-rich granule lumen** | **9/189** | **124/19550** | **3.32545554621267e-06** | **5.59092213707006e-05** | **3.67550349844559e-05** | **CSTB/MIF/ALDOA/CTSB/GPI/HBB/FTH1/CTSD/KRT1** | **9** | **4** |
| **GO:0015935** | **CC** | **GO:0015935** | **small ribosomal subunit** | **7/189** | **71/19550** | **5.57049572405904e-06** | **8.81449029277577e-05** | **5.79469524236482e-05** | **RPS17/RPS4X/RPSA/RPS14/RPS18/RPS3A/RPS27L** | **7** | **4** |
| **GO:0071556** | **CC** | **GO:0071556** | **integral component of lumenal side of endoplasmic reticulum membrane** | **5/189** | **29/19550** | **7.87714333361587e-06** | **0.000111523766144351** | **7.33163479250674e-05** | **CD74/HLA-DPB1/HLA-DRA/HLA-DPA1/HLA-C** | **5** | **4** |
| **GO:0098553** | **CC** | **GO:0098553** | **lumenal side of endoplasmic reticulum membrane** | **5/189** | **29/19550** | **7.87714333361587e-06** | **0.000111523766144351** | **7.33163479250674e-05** | **CD74/HLA-DPB1/HLA-DRA/HLA-DPA1/HLA-C** | **5** | **4** |
| **GO:0045111** | **CC** | **GO:0045111** | **intermediate filament cytoskeleton** | **12/189** | **258/19550** | **8.32646562541196e-06** | **0.000111990962661791** | **7.36234855299584e-05** | **KRT6B/KRT6A/KRT16/KRT17/KRT14/KRT6C/S100A8/KRT75/VIM/KRT5/KRT1/KRT15** | **12** | **4** |
| **GO:0005882** | **CC** | **GO:0005882** | **intermediate filament** | **11/189** | **217/19550** | **8.91246275819449e-06** | **0.000114164403902587** | **7.50523179637431e-05** | **KRT6B/KRT6A/KRT16/KRT17/KRT14/KRT6C/KRT75/VIM/KRT5/KRT1/KRT15** | **11** | **4** |
| **GO:0072562** | **CC** | **GO:0072562** | **blood microparticle** | **9/189** | **146/19550** | **1.26181831588494e-05** | **0.000153985461651273** | **0.000101230904157362** | **ACTB/HBB/SDCBP/PFN1/ACTG1/ANGPTL4/TGFB1/CLU/KRT1** | **9** | **4** |
| **GO:0101002** | **CC** | **GO:0101002** | **ficolin-1-rich granule** | **10/189** | **185/19550** | **1.31660431895141e-05** | **0.000153985461651273** | **0.000101230904157362** | **CSTB/MIF/ALDOA/CTSB/GPI/HBB/FTH1/CTSD/LGALS3/KRT1** | **10** | **4** |
| **GO:1904724** | **CC** | **GO:1904724** | **tertiary granule lumen** | **6/189** | **55/19550** | **1.47471478625295e-05** | **0.000165290948959185** | **0.000108663194776533** | **CSTB/ALDOA/HBB/FTH1/CTSD/B2M** | **6** | **4** |
| **GO:0098576** | **CC** | **GO:0098576** | **lumenal side of membrane** | **5/189** | **36/19550** | **2.36715612699949e-05** | **0.000254705999265145** | **0.000167445149194069** | **CD74/HLA-DPB1/HLA-DRA/HLA-DPA1/HLA-C** | **5** | **4** |
| **GO:0012507** | **CC** | **GO:0012507** | **ER to Golgi transport vesicle membrane** | **6/189** | **62/19550** | **2.95685759321753e-05** | **0.000305921035605968** | **0.000201114200672286** | **CD74/HLA-DPB1/HLA-DRA/HLA-DPA1/B2M/HLA-C** | **6** | **4** |
| **GO:0045095** | **CC** | **GO:0045095** | **keratin filament** | **7/189** | **96/19550** | **4.07494348306907e-05** | **0.000405985109979844** | **0.0002668968831016** | **KRT6B/KRT6A/KRT14/KRT6C/KRT75/KRT5/KRT1** | **7** | **4** |
| **GO:0005844** | **CC** | **GO:0005844** | **polysome** | **6/189** | **66/19550** | **4.23263111044561e-05** | **0.000406634917396382** | **0.000267324070133407** | **RPL36/RPL36A/RPS4X/RPL18A/VIM/RPL31** | **6** | **4** |
| **GO:0042470** | **CC** | **GO:0042470** | **melanosome** | **7/189** | **109/19550** | **9.16790366897906e-05** | **0.000822055362318455** | **0.000540423795224029** | **CTSB/SDCBP/CTSD/MLANA/TYRP1/PMEL/DCT** | **7** | **4** |
| **GO:0048770** | **CC** | **GO:0048770** | **pigment granule** | **7/189** | **109/19550** | **9.16790366897906e-05** | **0.000822055362318455** | **0.000540423795224029** | **CTSB/SDCBP/CTSD/MLANA/TYRP1/PMEL/DCT** | **7** | **4** |
| **GO:0070820** | **CC** | **GO:0070820** | **tertiary granule** | **8/189** | **164/19550** | **0.000198913457620571** | **0.00172605548709463** | **0.00113471853583212** | **CSTB/ALDOA/HBB/FTH1/CTSD/LGALS3/B2M/RAP2B** | **8** | **4** |
| **GO:0042788** | **CC** | **GO:0042788** | **polysomal ribosome** | **4/189** | **32/19550** | **0.000246186986419141** | **0.0020695093545859** | **0.00136050703021104** | **RPL36/RPL36A/RPL18A/RPL31** | **4** | **4** |
| **GO:0005775** | **CC** | **GO:0005775** | **vacuolar lumen** | **8/189** | **174/19550** | **0.000297310588837241** | **0.00240017122230021** | **0.00157788599235545** | **FTL/CTSB/CTSL/SDCBP/CTSD/CD74/S100A7/TUBB** | **8** | **4** |
| **GO:0030134** | **CC** | **GO:0030134** | **COPII-coated ER to Golgi transport vesicle** | **6/189** | **94/19550** | **0.000303367366387388** | **0.00240017122230021** | **0.00157788599235545** | **CD74/HLA-DPB1/HLA-DRA/HLA-DPA1/B2M/HLA-C** | **6** | **4** |
| **GO:0030139** | **CC** | **GO:0030139** | **endocytic vesicle** | **11/189** | **336/19550** | **0.000444671556054306** | **0.00341761853081738** | **0.00224676154637965** | **CTSL/HBB/ACTG1/CD74/VIM/HLA-DPB1/HLA-DRA/HLA-DPA1/B2M/TYRP1/HLA-C** | **11** | **4** |
| **GO:0031093** | **CC** | **GO:0031093** | **platelet alpha granule lumen** | **5/189** | **67/19550** | **0.000476067787716768** | **0.0035572843026614** | **0.00233857860632798** | **ALDOA/TMSB4X/TIMP1/TGFB1/CLU** | **5** | **4** |
| **GO:00364641** | **CC** | **GO:0036464** | **cytoplasmic ribonucleoprotein granule** | **9/189** | **236/19550** | **0.000498656304525012** | **0.00362536610587103** | **0.00238333596472836** | **APOBEC3A/ACTB/RPS4X/CARHSP1/ZFP36L1/RPLP0/APOBEC3B/TUBA1A/TUBB** | **9** | **4** |
| **GO:0098800** | **CC** | **GO:0098800** | **inner mitochondrial membrane protein complex** | **7/189** | **147/19550** | **0.000576096464824169** | **0.00407815655362372** | **0.00268100293879391** | **NDUFA4L2/NDUFB11/ATP5ME/NDUFS8/NDUFV2/TIMM10/GRPEL2** | **7** | **4** |
| **GO:0030669** | **CC** | **GO:0030669** | **clathrin-coated endocytic vesicle membrane** | **5/189** | **72/19550** | **0.000663399259218492** | **0.00457575386486601** | **0.0030081261956466** | **CD74/HLA-DPB1/HLA-DRA/HLA-DPA1/TYRP1** | **5** | **4** |
| **GO:0005766** | **CC** | **GO:0005766** | **primary lysosome** | **7/189** | **155/19550** | **0.000788642974492569** | **0.00517426732045125** | **0.00340159229049427** | **FTL/SDCBP/VNN1/CEACAM6/S100A7/MGST1/TUBB** | **7** | **4** |
| **GO:0042582** | **CC** | **GO:0042582** | **azurophil granule** | **7/189** | **155/19550** | **0.000788642974492569** | **0.00517426732045125** | **0.00340159229049427** | **FTL/SDCBP/VNN1/CEACAM6/S100A7/MGST1/TUBB** | **7** | **4** |
| **GO:00357701** | **CC** | **GO:0035770** | **ribonucleoprotein granule** | **9/189** | **254/19550** | **0.00084267695846837** | **0.00539714528161885** | **0.0035481135093405** | **APOBEC3A/ACTB/RPS4X/CARHSP1/ZFP36L1/RPLP0/APOBEC3B/TUBA1A/TUBB** | **9** | **4** |
| **GO:0098798** | **CC** | **GO:0098798** | **mitochondrial protein-containing complex** | **9/189** | **268/19550** | **0.00122673941424616** | **0.00767425354493531** | **0.00504509722382755** | **NDUFA4L2/NDUFB11/ATP5ME/NDUFS8/MRPL41/NDUFV2/TIMM10/MRPL52/GRPEL2** | **9** | **4** |
| **GO:0031091** | **CC** | **GO:0031091** | **platelet alpha granule** | **5/189** | **91/19550** | **0.00190280989290213** | **0.0113014059483808** | **0.00742960751057706** | **ALDOA/TMSB4X/TIMP1/TGFB1/CLU** | **5** | **4** |
| **GO:0045334** | **CC** | **GO:0045334** | **clathrin-coated endocytic vesicle** | **5/189** | **91/19550** | **0.00190280989290213** | **0.0113014059483808** | **0.00742960751057706** | **CD74/HLA-DPB1/HLA-DRA/HLA-DPA1/TYRP1** | **5** | **4** |
| **GO:0030662** | **CC** | **GO:0030662** | **coated vesicle membrane** | **7/189** | **181/19550** | **0.00193258242983463** | **0.0113014059483808** | **0.00742960751057706** | **CD74/HLA-DPB1/HLA-DRA/HLA-DPA1/B2M/TYRP1/HLA-C** | **7** | **4** |
| **GO:0030666** | **CC** | **GO:0030666** | **endocytic vesicle membrane** | **7/189** | **193/19550** | **0.00277120760666628** | **0.0158607414083666** | **0.0104269401549817** | **CD74/HLA-DPB1/HLA-DRA/HLA-DPA1/B2M/TYRP1/HLA-C** | **7** | **4** |
| **GO:0005743** | **CC** | **GO:0005743** | **mitochondrial inner membrane** | **12/189** | **495/19550** | **0.00324850201407939** | **0.0182051467039033** | **0.0119681653150293** | **NDUFA4L2/NDUFB11/ATP5ME/LGALS3/NDUFS8/MRPL41/CLU/NDUFV2/TIMM10/TMEM14C/MRPL52/GRPEL2** | **12** | **4** |
| **GO:0005771** | **CC** | **GO:0005771** | **multivesicular body** | **4/189** | **64/19550** | **0.0034211894232537** | **0.0187816317317397** | **0.0123471497982088** | **CTSL/CD74/PMEL/CST7** | **4** | **4** |
| **GO:0031904** | **CC** | **GO:0031904** | **endosome lumen** | **3/189** | **35/19550** | **0.00463609923126866** | **0.0249422138642254** | **0.0163971509653292** | **CTSB/CTSL/B2M** | **3** | **4** |
| **GO:0044754** | **CC** | **GO:0044754** | **autolysosome** | **2/189** | **11/19550** | **0.00482815134375321** | **0.0254661315974434** | **0.0167415774148718** | **FTL/FTH1** | **2** | **4** |
| **GO:0030176** | **CC** | **GO:0030176** | **integral component of endoplasmic reticulum membrane** | **6/189** | **162/19550** | **0.0049714769177682** | **0.0255265907675001** | **0.0167813236115829** | **CD74/HLA-DPB1/HLA-DRA/HLA-DPA1/B2M/HLA-C** | **6** | **4** |
| **GO:0005884** | **CC** | **GO:0005884** | **actin filament** | **5/189** | **114/19550** | **0.00502940264192382** | **0.0255265907675001** | **0.0167813236115829** | **ANXA1/ACTB/ACTG1/GJB6/FLNA** | **5** | **4** |
| **GO:0030665** | **CC** | **GO:0030665** | **clathrin-coated vesicle membrane** | **5/189** | **116/19550** | **0.00541090470800373** | **0.0269543216009815** | **0.0177199218507725** | **CD74/HLA-DPB1/HLA-DRA/HLA-DPA1/TYRP1** | **5** | **4** |
| **GO:0031227** | **CC** | **GO:0031227** | **intrinsic component of endoplasmic reticulum membrane** | **6/189** | **170/19550** | **0.00626172445837146** | **0.0306255250782168** | **0.0201333915599312** | **CD74/HLA-DPB1/HLA-DRA/HLA-DPA1/B2M/HLA-C** | **6** | **4** |
| **GO:0042583** | **CC** | **GO:0042583** | **chromaffin granule** | **2/189** | **13/19550** | **0.00676077341983071** | **0.032475858034544** | **0.0213498107994654** | **CTSL/CLU** | **2** | **4** |
| **GO:0005744** | **CC** | **GO:0005744** | **TIM23 mitochondrial import inner membrane translocase complex** | **2/189** | **14/19550** | **0.00783769228420588** | **0.0369884074465155** | **0.0243163860341013** | **TIMM10/GRPEL2** | **2** | **4** |
| **GO:0030135** | **CC** | **GO:0030135** | **coated vesicle** | **8/189** | **299/19550** | **0.00877815140119188** | **0.0401021925997818** | **0.0263634058178961** | **MALL/CD74/HLA-DPB1/HLA-DRA/HLA-DPA1/B2M/TYRP1/HLA-C** | **8** | **4** |
| **GO:00059111** | **CC** | **GO:0005911** | **cell-cell junction** | **11/189** | **494/19550** | **0.0087956481910302** | **0.0401021925997818** | **0.0263634058178961** | **ANXA1/NDRG1/FSCN1/ACTB/DSG3/PERP/SDCBP/ACTG1/GJB6/RAP2B/FLNA** | **11** | **4** |
| **GO:0005746** | **CC** | **GO:0005746** | **mitochondrial respirasome** | **4/189** | **89/19550** | **0.0109162283964956** | **0.0460819763848559** | **0.0302945491397214** | **NDUFA4L2/NDUFB11/NDUFS8/NDUFV2** | **4** | **4** |
| **GO:0030667** | **CC** | **GO:0030667** | **secretory granule membrane** | **8/189** | **311/19550** | **0.0109578548136125** | **0.0460819763848559** | **0.0302945491397214** | **PLAUR/TYROBP/VNN1/CEACAM6/LGALS3/MGST1/RAP2B/HLA-C** | **8** | **4** |
| **GO:0005747** | **CC** | **GO:0005747** | **mitochondrial respiratory chain complex I** | **3/189** | **48/19550** | **0.0111802826941053** | **0.0460819763848559** | **0.0302945491397214** | **NDUFB11/NDUFS8/NDUFV2** | **3** | **4** |
| **GO:0030964** | **CC** | **GO:0030964** | **NADH dehydrogenase complex** | **3/189** | **48/19550** | **0.0111802826941053** | **0.0460819763848559** | **0.0302945491397214** | **NDUFB11/NDUFS8/NDUFV2** | **3** | **4** |
| **GO:0045271** | **CC** | **GO:0045271** | **respiratory chain complex I** | **3/189** | **48/19550** | **0.0111802826941053** | **0.0460819763848559** | **0.0302945491397214** | **NDUFB11/NDUFS8/NDUFV2** | **3** | **4** |
| **GO:0098803** | **CC** | **GO:0098803** | **respiratory chain complex** | **4/189** | **90/19550** | **0.0113396699209717** | **0.0460819763848559** | **0.0302945491397214** | **NDUFA4L2/NDUFB11/NDUFS8/NDUFV2** | **4** | **4** |
| **GO:0005788** | **CC** | **GO:0005788** | **endoplasmic reticulum lumen** | **8/189** | **313/19550** | **0.0113568864327824** | **0.0460819763848559** | **0.0302945491397214** | **ERO1A/PLAUR/DBI/TIMP1/LGALS1/B2M/IGFBP7/CLU** | **8** | **4** |
| **GO:0005767** | **CC** | **GO:0005767** | **secondary lysosome** | **2/189** | **17/19550** | **0.0114930114926267** | **0.0460819763848559** | **0.0302945491397214** | **FTL/FTH1** | **2** | **4** |
| **GO:0035578** | **CC** | **GO:0035578** | **azurophil granule lumen** | **4/189** | **91/19550** | **0.0117735485429519** | **0.0460819763848559** | **0.0302945491397214** | **FTL/SDCBP/S100A7/TUBB** | **4** | **4** |
| **GO:0030136** | **CC** | **GO:0030136** | **clathrin-coated vesicle** | **6/189** | **196/19550** | **0.0121389438598292** | **0.0460819763848559** | **0.0302945491397214** | **MALL/CD74/HLA-DPB1/HLA-DRA/HLA-DPA1/TYRP1** | **6** | **4** |
| **GO:0055038** | **CC** | **GO:0055038** | **recycling endosome membrane** | **4/189** | **92/19550** | **0.0122179529006949** | **0.0460819763848559** | **0.0302945491397214** | **NDRG1/B2M/RAP2B/HLA-C** | **4** | **4** |
| **GO:0000932** | **CC** | **GO:0000932** | **P-body** | **4/189** | **93/19550** | **0.012672969512206** | **0.0460819763848559** | **0.0302945491397214** | **APOBEC3A/CARHSP1/ZFP36L1/APOBEC3B** | **4** | **4** |
| **GO:0033162** | **CC** | **GO:0033162** | **melanosome membrane** | **2/189** | **18/19550** | **0.0128481346797925** | **0.0460819763848559** | **0.0302945491397214** | **TYRP1/DCT** | **2** | **4** |
| **GO:0045009** | **CC** | **GO:0045009** | **chitosome** | **2/189** | **18/19550** | **0.0128481346797925** | **0.0460819763848559** | **0.0302945491397214** | **TYRP1/DCT** | **2** | **4** |
| **GO:0090741** | **CC** | **GO:0090741** | **pigment granule membrane** | **2/189** | **18/19550** | **0.0128481346797925** | **0.0460819763848559** | **0.0302945491397214** | **TYRP1/DCT** | **2** | **4** |
| **GO:0097440** | **CC** | **GO:0097440** | **apical dendrite** | **2/189** | **18/19550** | **0.0128481346797925** | **0.0460819763848559** | **0.0302945491397214** | **CLU/FLNA** | **2** | **4** |
| **GO:0005811** | **CC** | **GO:0005811** | **lipid droplet** | **4/189** | **96/19550** | **0.0141025260904314** | **0.0499155199779744** | **0.0328147421494803** | **GAPDH/HILPDA/RBP1/SDR16C5** | **4** | **4** |
| **GO:0003735** | **MF** | **GO:0003735** | **structural constituent of ribosome** | **19/185** | **182/18368** | **2.94286417636771e-14** | **1.16537421384161e-11** | **9.85085061142034e-12** | **RPL12/RPL36/RPL10/RPL36A/RPS17/RPL3/RPS4X/RPSA/RPS14/RPL5/RPLP0/RPL18A/RPS18/RPL31/RPS3A/RPS27L/RPL13A/MRPL41/MRPL52** | **19** | **4** |
| **GO:0050786** | **MF** | **GO:0050786** | **RAGE receptor binding** | **7/185** | **10/18368** | **1.09764726754841e-12** | **2.17334158974585e-10** | **1.83711490042313e-10** | **S100A8/S100A12/S100A4/HMGB2/S100A9/S100A7/S100A13** | **7** | **4** |
| **GO:0048306** | **MF** | **GO:0048306** | **calcium-dependent protein binding** | **12/185** | **88/18368** | **8.03160178843251e-11** | **1.06017143607309e-08** | **8.96157673235627e-09** | **ANXA1/S100A8/S100A10/S100A12/S100P/S100A6/S100A16/S100A4/S100A9/S100A7/S100A7A/S100A13** | **12** | **4** |
| **GO:0005200** | **MF** | **GO:0005200** | **structural constituent of cytoskeleton** | **11/185** | **103/18368** | **7.16572998830732e-09** | **7.09407268842424e-07** | **5.99658456916244e-07** | **KRT6B/KRT6A/KRT16/KRT14/ACTB/ACTG1/VIM/KRT5/TUBA1A/TUBB/KRT15** | **11** | **4** |
| **GO:0004866** | **MF** | **GO:0004866** | **endopeptidase inhibitor activity** | **11/185** | **180/18368** | **2.16629571639636e-06** | **0.000171570620738592** | **0.000145027797434535** | **CSTB/PI3/WFDC12/GAPDH/SLPI/SERPINB4/TIMP1/CARD18/SPINK6/SERPINB9/CST7** | **11** | **4** |
| **GO:0030414** | **MF** | **GO:0030414** | **peptidase inhibitor activity** | **11/185** | **187/18368** | **3.1383364904544e-06** | **0.00020713020836999** | **0.000175086141046403** | **CSTB/PI3/WFDC12/GAPDH/SLPI/SERPINB4/TIMP1/CARD18/SPINK6/SERPINB9/CST7** | **11** | **4** |
| **GO:0061134** | **MF** | **GO:0061134** | **peptidase regulator activity** | **12/185** | **230/18368** | **3.8692667092052e-06** | **0.000218889945263608** | **0.000185026588500339** | **CSTB/PI3/WFDC12/GAPDH/SLPI/SERPINB4/TIMP1/CARD18/SPINK6/RPS27L/SERPINB9/CST7** | **12** | **4** |
| **GO:0061135** | **MF** | **GO:0061135** | **endopeptidase regulator activity** | **11/185** | **194/18368** | **4.47309232316673e-06** | **0.000221418069996753** | **0.000187163599837766** | **CSTB/PI3/WFDC12/GAPDH/SLPI/SERPINB4/TIMP1/CARD18/SPINK6/SERPINB9/CST7** | **11** | **4** |
| **GO:0023026** | **MF** | **GO:0023026** | **MHC class II protein complex binding** | **5/185** | **27/18368** | **6.62130809467149e-06** | **0.000291337556165546** | **0.000246266195801817** | **CD74/HLA-DPB1/HLA-DRA/HLA-DPA1/B2M** | **5** | **4** |
| **GO:0016209** | **MF** | **GO:0016209** | **antioxidant activity** | **7/185** | **86/18368** | **2.57874584417402e-05** | **0.00102118335429291** | **0.000863201240470881** | **HBB/SOD1/GPX3/S100A9/GPX4/MGST1/TXN** | **7** | **4** |
| **GO:0023023** | **MF** | **GO:0023023** | **MHC protein complex binding** | **5/185** | **36/18368** | **2.87305746207096e-05** | **0.00103430068634555** | **0.000874289256400542** | **CD74/HLA-DPB1/HLA-DRA/HLA-DPA1/B2M** | **5** | **4** |
| **GO:0042056** | **MF** | **GO:0042056** | **chemoattractant activity** | **5/185** | **37/18368** | **3.29500120943313e-05** | **0.00108735039911293** | **0.000919131916315559** | **DEFB4A/MIF/DEFB103B/HMGB2/LGALS3** | **5** | **4** |
| **GO:0019843** | **MF** | **GO:0019843** | **rRNA binding** | **6/185** | **68/18368** | **6.2758253007019e-05** | **0.00191171293775227** | **0.00161596149443174** | **RPL12/RPS4X/RPS14/RPL5/RPLP0/RPS18** | **6** | **4** |
| **GO:0030547** | **MF** | **GO:0030547** | **signaling receptor inhibitor activity** | **5/185** | **43/18368** | **6.92929510793966e-05** | **0.00196000061624579** | **0.00165677883031941** | **MTRNR2L12/MTRNR2L10/MTRNR2L8/MTRNR2L1/LY6E** | **5** | **4** |
| **GO:0048019** | **MF** | **GO:0048019** | **receptor antagonist activity** | **4/185** | **32/18368** | **0.000287304775957437** | **0.00758484608527633** | **0.00641143289505017** | **MTRNR2L12/MTRNR2L10/MTRNR2L8/MTRNR2L1** | **4** | **4** |
| **GO:0030280** | **MF** | **GO:0030280** | **structural constituent of skin epidermis** | **3/185** | **15/18368** | **0.000418365487933204** | **0.010351232417429** | **0.00874984558411066** | **PI3/SPRR1A/KRT1** | **3** | **4** |
| **GO:0042605** | **MF** | **GO:0042605** | **peptide antigen binding** | **4/185** | **36/18368** | **0.000456082661728072** | **0.010351232417429** | **0.00874984558411066** | **HLA-DPB1/HLA-DRA/HLA-DPA1/HLA-C** | **4** | **4** |
| **GO:0004867** | **MF** | **GO:0004867** | **serine-type endopeptidase inhibitor activity** | **6/185** | **98/18368** | **0.000470510564428592** | **0.010351232417429** | **0.00874984558411066** | **PI3/WFDC12/SLPI/SERPINB4/SPINK6/SERPINB9** | **6** | **4** |
| **GO:0004602** | **MF** | **GO:0004602** | **glutathione peroxidase activity** | **3/185** | **22/18368** | **0.00134444511174479** | **0.028021066539523** | **0.0236860690047004** | **GPX3/GPX4/MGST1** | **3** | **4** |
| **GO:0004601** | **MF** | **GO:0004601** | **peroxidase activity** | **4/185** | **51/18368** | **0.00172064081206406** | **0.0324463695989223** | **0.0274267558013219** | **HBB/GPX3/GPX4/MGST1** | **4** | **4** |
| **GO:0016860** | **MF** | **GO:0016860** | **intramolecular oxidoreductase activity** | **4/185** | **51/18368** | **0.00172064081206406** | **0.0324463695989223** | **0.0274267558013219** | **MIF/ERO1A/GPI/DCT** | **4** | **4** |
| **GO:0016684** | **MF** | **GO:0016684** | **oxidoreductase activity, acting on peroxide as acceptor** | **4/185** | **55/18368** | **0.00227613584898313** | **0.0406060740022091** | **0.0343241135903841** | **HBB/GPX3/GPX4/MGST1** | **4** | **4** |
| **GO:0004869** | **MF** | **GO:0004869** | **cysteine-type endopeptidase inhibitor activity** | **4/185** | **56/18368** | **0.00243219311141582** | **0.0406060740022091** | **0.0343241135903841** | **CSTB/CARD18/SERPINB9/CST7** | **4** | **4** |
| **GO:0048027** | **MF** | **GO:0048027** | **mRNA 5'-UTR binding** | **3/185** | **27/18368** | **0.00246097418195207** | **0.0406060740022091** | **0.0343241135903841** | **RPS14/RPL5/RPS3A** | **3** | **4** |
| **GO:0043236** | **MF** | **GO:0043236** | **laminin binding** | **3/185** | **28/18368** | **0.00273603400447395** | **0.0433387786308674** | **0.0366340553020091** | **RPSA/LGALS1/LGALS3** | **3** | **4** |
| **GO:0003785** | **MF** | **GO:0003785** | **actin monomer binding** | **3/185** | **29/18368** | **0.00302931270425976** | **0.0461387627264179** | **0.0390008680143564** | **TMSB4X/TMSB10/PFN1** | **3** | **4** |
| **GO:0005507** | **MF** | **GO:0005507** | **copper ion binding** | **4/185** | **61/18368** | **0.00332377282684687** | **0.0487486681270875** | **0.0412070081457039** | **S100A12/SOD1/DCT/S100A13** | **4** | **4** |
| **GO:0019207** | **MF** | **GO:0019207** | **kinase regulator activity** | **8/87** | **233/18368** | **1.46738131821778e-05** | **0.00352171516372268** | **0.00298110099385297** | **KLF4/CKS2/CD24/GSTP1/CAMK2N1/GPRC5C/HEXIM1/GPRC5A** | **8** | **5** |
| **GO:0140416** | **MF** | **GO:0140416** | **transcription regulator inhibitor activity** | **3/87** | **21/18368** | **0.000128337486795287** | **0.0154004984154344** | **0.0130363868165739** | **ID1/ID3/ID4** | **3** | **5** |
| **GO:0140678** | **MF** | **GO:0140678** | **molecular function inhibitor activity** | **5/87** | **128/18368** | **0.00035553689087246** | **0.0250253297883915** | **0.0211837221454366** | **ANXA2/ID1/ID3/ID4/DYNLL1** | **5** | **5** |
| **GO:0019887** | **MF** | **GO:0019887** | **protein kinase regulator activity** | **6/87** | **204/18368** | **0.000417088829806525** | **0.0250253297883915** | **0.0211837221454366** | **CKS2/CD24/CAMK2N1/GPRC5C/HEXIM1/GPRC5A** | **6** | **5** |
| **GO:00483061** | **MF** | **GO:0048306** | **calcium-dependent protein binding** | **4/87** | **88/18368** | **0.000808681692443** | **0.038816721237264** | **0.0328580140297893** | **S100A14/S100A11/S100A2/ANXA2** | **4** | **5** |
| **GO:0030295** | **MF** | **GO:0030295** | **protein kinase activator activity** | **4/87** | **101/18368** | **0.00135144263785653** | **0.0445824272260749** | **0.0377386335729494** | **CKS2/CD24/GPRC5C/GPRC5A** | **4** | **5** |
| **GO:0098632** | **MF** | **GO:0098632** | **cell-cell adhesion mediator activity** | **3/87** | **49/18368** | **0.00161565677479404** | **0.0445824272260749** | **0.0377386335729494** | **S100A11/DSC2/ANXA2** | **3** | **5** |
| **GO:0019209** | **MF** | **GO:0019209** | **kinase activator activity** | **4/87** | **107/18368** | **0.00167184102097781** | **0.0445824272260749** | **0.0377386335729494** | **CKS2/CD24/GPRC5C/GPRC5A** | **4** | **5** |
| **GO:0051087** | **MF** | **GO:0051087** | **chaperone binding** | **4/87** | **107/18368** | **0.00167184102097781** | **0.0445824272260749** | **0.0377386335729494** | **HES1/HLA-B/HSPA8/HYOU1** | **4** | **5** |
| **GO:0044548** | **MF** | **GO:0044548** | **S100 protein binding** | **2/87** | **14/18368** | **0.00194484596661043** | **0.0466763031986502** | **0.0395110812164013** | **S100A11/ANXA2** | **2** | **5** |

**Supplementary** Table 5 GSEA

**Supplementary** Table 6 Integene

|  | x |
| --- | --- |
| 1 | LCE3E |
| 2 | LCE3D |
| 3 | CNFN |
| 4 | SPRR2B |
| 5 | SPRR2E |
| 6 | SPRR2A |
| 7 | SERPINB3 |
| 8 | SPRR2G |
| 9 | SPRR2D |
| 10 | SPRR1B |
| 11 | PRSS22 |
| 12 | CST6 |
| 13 | RHCG |
| 14 | LCN2 |
| 15 | S100A7 |
| 16 | S100A9 |
| 17 | PI3 |
| 18 | FCHSD1 |
| 19 | SPRR1A |
| 20 | SERPINB4 |
| 21 | KLK10 |
| 22 | KRT6B |
| 23 | EHF |
| 24 | CD24 |
| 25 | IFI27 |
| 26 | SPRR2F |
| 27 | UPP1 |
| 28 | DSC2 |
| 29 | HAL |
| 30 | S100A8 |
| 31 | HEPHL1 |
| 32 | KLK6 |
| 33 | KRT16 |
| 34 | KRT6A |
| 35 | ARG1 |
| 36 | HPSE |
| 37 | OASL |
| 38 | S100A12 |
| 39 | PLA2G4D |
| 40 | VNN3 |
| 41 | WFDC12 |
| 42 | TGM1 |
| 43 | FOSL1 |
| 44 | A2ML1 |
| 45 | TMPRSS11D |
| 46 | GDA |
| 47 | SERPINB13 |
| 48 | TREX2 |
| 49 | DSG3 |
| 50 | AQP9 |
| 51 | SLC7A5 |
| 52 | DEFB103B |
| 53 | GDPD3 |
| 54 | FUT3 |
| 55 | DEFB103A |
| 56 | PLA2G4E |
| 57 | DEFB4A |
| 58 | RGS1 |
| 59 | SLC6A14 |
| 60 | S100A2 |
| 61 | KRT6C |
| 62 | CCL20 |
| 63 | LCE3A |
| 64 | KYNU |
| 65 | ZC3H12A |
| 66 | APOC1 |
| 67 | NFKBIZ |
| 68 | EPSTI1 |
| 69 | TYMP |
| 70 | FABP5 |
| 71 | IFI6 |
| 72 | ISG15 |

**Supplementary Table 7 DEG_keygene_enrichGO**

|  | ONTOLOGY | ID | Description | GeneRatio | BgRatio | pvalue | p.adjust | qvalue | geneID | Count |
| --- | --- | --- | --- | --- | --- | --- | --- | --- | --- | --- |
| GO:0031424 | BP | GO:0031424 | keratinization | 14/70 | 58/18723 | 2.33374517177356e-22 | 2.99419505538547e-19 | 2.43937784796962e-19 | SPRR2A/SPRR2B/LCE3A/SPRR2D/SPRR2E/SPRR2F/SPRR2G/LCE3E/LCE3D/SPRR1B/TGM1/CNFN/KRT16/SPRR1A | 14 |
| GO:0030216 | BP | GO:0030216 | keratinocyte differentiation | 15/70 | 139/18723 | 2.6986890725991e-18 | 1.73120904007232e-15 | 1.41042013110048e-15 | SPRR2A/SPRR2B/LCE3A/SPRR2D/S100A7/SPRR2E/SPRR2F/SPRR2G/LCE3E/LCE3D/SPRR1B/TGM1/CNFN/KRT16/SPRR1A | 15 |
| GO:0008544 | BP | GO:0008544 | epidermis development | 18/70 | 324/18723 | 1.24263612833315e-16 | 5.31434050883812e-14 | 4.32960587871867e-14 | SPRR2A/SPRR2B/LCE3A/SPRR2D/S100A7/SPRR2E/SPRR2F/SPRR2G/FABP5/LCE3E/LCE3D/HPSE/SPRR1B/TGM1/CNFN/KRT16/SPRR1A/CST6 | 18 |
| GO:0009913 | BP | GO:0009913 | epidermal cell differentiation | 15/70 | 202/18723 | 7.9246537596415e-16 | 2.54183269340501e-13 | 2.07083715350632e-13 | SPRR2A/SPRR2B/LCE3A/SPRR2D/S100A7/SPRR2E/SPRR2F/SPRR2G/LCE3E/LCE3D/SPRR1B/TGM1/CNFN/KRT16/SPRR1A | 15 |
| GO:0043588 | BP | GO:0043588 | skin development | 16/70 | 263/18723 | 1.83257803071644e-15 | 4.70239522681838e-13 | 3.83105259895036e-13 | SPRR2A/SPRR2B/LCE3A/SPRR2D/S100A7/SPRR2E/SPRR2F/SPRR2G/LCE3E/LCE3D/HPSE/SPRR1B/TGM1/CNFN/KRT16/SPRR1A | 16 |
| GO:0042742 | BP | GO:0042742 | defense response to bacterium | 14/70 | 350/18723 | 3.68769107903993e-11 | 7.88551275734706e-09 | 6.42434603769589e-09 | DEFB4A/S100A9/S100A8/PI3/LCE3A/S100A7/S100A12/KRT6A/LCN2/DEFB103B/DEFB103A/WFDC12/CCL20/ISG15 | 14 |
| GO:0031640 | BP | GO:0031640 | killing of cells of other organism | 7/70 | 68/18723 | 6.07305181784187e-09 | 1.1131036403273e-06 | 9.06848188739394e-07 | DEFB4A/LCE3A/S100A12/KRT6A/DEFB103B/DEFB103A/ARG1 | 7 |
| GO:0018149 | BP | GO:0018149 | peptide cross-linking | 5/70 | 35/18723 | 1.87967920296184e-07 | 3.01453552175004e-05 | 2.45594927439619e-05 | PI3/SPRR2E/SPRR1B/TGM1/SPRR1A | 5 |
| GO:0051238 | BP | GO:0051238 | sequestering of metal ion | 4/70 | 16/18723 | 3.15155498462691e-07 | 4.4927167169737e-05 | 3.66022701723336e-05 | S100A9/S100A8/S100A7/LCN2 | 4 |
| GO:0019730 | BP | GO:0019730 | antimicrobial humoral response | 7/70 | 122/18723 | 3.57834634976433e-07 | 4.59101836674764e-05 | 3.74031360559577e-05 | DEFB4A/S100A9/PI3/S100A7/S100A12/KRT6A/WFDC12 | 7 |
| GO:0001906 | BP | GO:0001906 | cell killing | 8/70 | 188/18723 | 4.93850085480871e-07 | 5.76008781519961e-05 | 4.69275727160292e-05 | DEFB4A/SERPINB4/LCE3A/S100A12/KRT6A/DEFB103B/DEFB103A/ARG1 | 8 |
| GO:0052547 | BP | GO:0052547 | regulation of peptidase activity | 11/70 | 461/18723 | 1.04634666712085e-06 | 0.000111871897826337 | 9.11423017939476e-05 | S100A9/S100A8/SERPINB4/PI3/SERPINB3/SERPINB13/A2ML1/PRSS22/CST6/WFDC12/IFI6 | 11 |
| GO:0051702 | BP | GO:0051702 | biological process involved in interaction with symbiont | 6/70 | 94/18723 | 1.37950864843306e-06 | 0.000136146891995355 | 0.000110919197400326 | ZC3H12A/KRT6A/IFI27/DEFB103B/DEFB103A/ARG1 | 6 |
| GO:0046434 | BP | GO:0046434 | organophosphate catabolic process | 7/70 | 155/18723 | 1.80160434668573e-06 | 0.000165104169771271 | 0.000134510760620972 | GDA/PLA2G4D/GDPD3/TYMP/PLA2G4E/UPP1/APOC1 | 7 |
| GO:0051873 | BP | GO:0051873 | killing by host of symbiont cells | 4/70 | 29/18723 | 3.96469013234722e-06 | 0.000316527453804518 | 0.000257875671024233 | KRT6A/DEFB103B/DEFB103A/ARG1 | 4 |
| GO:0051883 | BP | GO:0051883 | killing of cells in other organism involved in symbiotic interaction | 4/70 | 29/18723 | 3.96469013234722e-06 | 0.000316527453804518 | 0.000257875671024233 | KRT6A/DEFB103B/DEFB103A/ARG1 | 4 |
| GO:0010951 | BP | GO:0010951 | negative regulation of endopeptidase activity | 8/70 | 252/18723 | 4.42828837576001e-06 | 0.000316527453804518 | 0.000257875671024233 | SERPINB4/PI3/SERPINB3/SERPINB13/A2ML1/CST6/WFDC12/IFI6 | 8 |
| GO:0052548 | BP | GO:0052548 | regulation of endopeptidase activity | 10/70 | 432/18723 | 4.44075928954117e-06 | 0.000316527453804518 | 0.000257875671024233 | S100A9/S100A8/SERPINB4/PI3/SERPINB3/SERPINB13/A2ML1/CST6/WFDC12/IFI6 | 10 |
| GO:0010466 | BP | GO:0010466 | negative regulation of peptidase activity | 8/70 | 262/18723 | 5.89503620792111e-06 | 0.00038183052936383 | 0.000311078242325375 | SERPINB4/PI3/SERPINB3/SERPINB13/A2ML1/CST6/WFDC12/IFI6 | 8 |
| GO:0046475 | BP | GO:0046475 | glycerophospholipid catabolic process | 4/70 | 32/18723 | 5.95215166584303e-06 | 0.00038183052936383 | 0.000311078242325375 | PLA2G4D/GDPD3/PLA2G4E/APOC1 | 4 |
| GO:0051346 | BP | GO:0051346 | negative regulation of hydrolase activity | 9/70 | 379/18723 | 1.13561474906844e-05 | 0.000670093310480772 | 0.000545926617145183 | SERPINB4/PI3/SERPINB3/SERPINB13/A2ML1/CST6/WFDC12/IFI6/APOC1 | 9 |
| GO:0061844 | BP | GO:0061844 | antimicrobial humoral immune response mediated by antimicrobial peptide | 5/70 | 79/18723 | 1.14902983870436e-05 | 0.000670093310480772 | 0.000545926617145183 | DEFB4A/S100A9/S100A7/S100A12/KRT6A | 5 |
| GO:0009159 | BP | GO:0009159 | deoxyribonucleoside monophosphate catabolic process | 3/70 | 14/18723 | 1.76875940791933e-05 | 0.000986660139287173 | 0.000803834367077297 | GDA/TYMP/UPP1 | 3 |
| GO:0050829 | BP | GO:0050829 | defense response to Gram-negative bacterium | 5/70 | 88/18723 | 1.9460336767629e-05 | 0.00102556086760337 | 0.000835526883152274 | DEFB4A/LCE3A/S100A7/DEFB103B/DEFB103A | 5 |
| GO:0060326 | BP | GO:0060326 | cell chemotaxis | 8/70 | 310/18723 | 1.99836490179924e-05 | 0.00102556086760337 | 0.000835526883152274 | DEFB4A/S100A9/S100A8/S100A7/S100A12/DEFB103B/DEFB103A/CCL20 | 8 |
| GO:0009395 | BP | GO:0009395 | phospholipid catabolic process | 4/70 | 49/18723 | 3.34301330646251e-05 | 0.00158855039710793 | 0.0012941957946656 | PLA2G4D/GDPD3/PLA2G4E/APOC1 | 4 |
| GO:0050832 | BP | GO:0050832 | defense response to fungus | 4/70 | 49/18723 | 3.34301330646251e-05 | 0.00158855039710793 | 0.0012941957946656 | S100A9/S100A8/S100A12/ARG1 | 4 |
| GO:0050830 | BP | GO:0050830 | defense response to Gram-positive bacterium | 5/70 | 101/18723 | 3.78968203024453e-05 | 0.00173550100116937 | 0.00141391680203568 | DEFB4A/LCE3A/KRT6A/DEFB103B/DEFB103A | 5 |
| GO:0009125 | BP | GO:0009125 | nucleoside monophosphate catabolic process | 3/70 | 18/18723 | 3.92280039235477e-05 | 0.00173550100116937 | 0.00141391680203568 | GDA/TYMP/UPP1 | 3 |
| GO:0035821 | BP | GO:0035821 | modulation of process of other organism | 5/70 | 106/18723 | 4.77910112507257e-05 | 0.00200042365262179 | 0.00162974991758907 | S100A9/ZC3H12A/KRT6A/IFI27/ARG1 | 5 |
| GO:0045861 | BP | GO:0045861 | negative regulation of proteolysis | 8/70 | 351/18723 | 4.83344764078532e-05 | 0.00200042365262179 | 0.00162974991758907 | SERPINB4/PI3/SERPINB3/SERPINB13/A2ML1/CST6/WFDC12/IFI6 | 8 |
| GO:0009620 | BP | GO:0009620 | response to fungus | 4/70 | 60/18723 | 7.45947636036254e-05 | 0.00299078380323285 | 0.00243659869271053 | S100A9/S100A8/S100A12/ARG1 | 4 |
| GO:0009162 | BP | GO:0009162 | deoxyribonucleoside monophosphate metabolic process | 3/70 | 23/18723 | 8.4004316471813e-05 | 0.00326598600101018 | 0.00266080657915503 | GDA/TYMP/UPP1 | 3 |
| GO:0046503 | BP | GO:0046503 | glycerolipid catabolic process | 4/70 | 65/18723 | 0.000102122458380072 | 0.00373147448335222 | 0.00304004115516163 | PLA2G4D/GDPD3/PLA2G4E/APOC1 | 4 |
| GO:0044403 | BP | GO:0044403 | biological process involved in symbiotic interaction | 7/70 | 290/18723 | 0.000103583994053125 | 0.00373147448335222 | 0.00304004115516163 | SERPINB3/ZC3H12A/KRT6A/IFI27/DEFB103B/DEFB103A/ARG1 | 7 |
| GO:0071621 | BP | GO:0071621 | granulocyte chemotaxis | 5/70 | 125/18723 | 0.000104702323772938 | 0.00373147448335222 | 0.00304004115516163 | S100A9/S100A8/S100A7/S100A12/CCL20 | 5 |
| GO:0006959 | BP | GO:0006959 | humoral immune response | 7/70 | 317/18723 | 0.000179513241128816 | 0.00622474292887217 | 0.00507131290016825 | DEFB4A/S100A9/PI3/S100A7/S100A12/KRT6A/WFDC12 | 7 |
| GO:0009264 | BP | GO:0009264 | deoxyribonucleotide catabolic process | 3/70 | 30/18723 | 0.000189000829759511 | 0.00638126485740666 | 0.00519883168839875 | GDA/TYMP/UPP1 | 3 |
| GO:0046386 | BP | GO:0046386 | deoxyribose phosphate catabolic process | 3/70 | 31/18723 | 0.000208691329209502 | 0.00686540962502028 | 0.00559326558448139 | GDA/TYMP/UPP1 | 3 |
| GO:0097530 | BP | GO:0097530 | granulocyte migration | 5/70 | 148/18723 | 0.000230911951518343 | 0.00740650084495084 | 0.00603409389099248 | S100A9/S100A8/S100A7/S100A12/CCL20 | 5 |
| GO:0002237 | BP | GO:0002237 | response to molecule of bacterial origin | 7/70 | 363/18723 | 0.000408219586960405 | 0.0127742860992732 | 0.010407241331237 | S100A9/S100A8/S100A7/ZC3H12A/LCN2/CD24/ARG1 | 7 |
| GO:0009394 | BP | GO:0009394 | 2'-deoxyribonucleotide metabolic process | 3/70 | 40/18723 | 0.000447787901260288 | 0.0136788542218321 | 0.0111441951366282 | GDA/TYMP/UPP1 | 3 |
| GO:0019692 | BP | GO:0019692 | deoxyribose phosphate metabolic process | 3/70 | 42/18723 | 0.000517529165974512 | 0.0154416260452395 | 0.0125803295425383 | GDA/TYMP/UPP1 | 3 |
| GO:0009262 | BP | GO:0009262 | deoxyribonucleotide metabolic process | 3/70 | 44/18723 | 0.000593868527287828 | 0.0170898958312913 | 0.0139231788657113 | GDA/TYMP/UPP1 | 3 |
| GO:0030593 | BP | GO:0030593 | neutrophil chemotaxis | 4/70 | 103/18723 | 0.000599411778961892 | 0.0170898958312913 | 0.0139231788657113 | S100A9/S100A8/S100A12/CCL20 | 4 |
| GO:0009176 | BP | GO:0009176 | pyrimidine deoxyribonucleoside monophosphate metabolic process | 2/70 | 12/18723 | 0.00088765992817884 | 0.0247396995531788 | 0.0201554921904308 | TYMP/UPP1 | 2 |
| GO:0046916 | BP | GO:0046916 | cellular transition metal ion homeostasis | 4/70 | 115/18723 | 0.000906286733436792 | 0.0247396995531788 | 0.0201554921904308 | S100A9/S100A8/HEPHL1/LCN2 | 4 |
| GO:0051709 | BP | GO:0051709 | regulation of killing of cells of other organism | 2/70 | 13/18723 | 0.00104651905167712 | 0.0272782732797763 | 0.0222236742559116 | KRT6A/ARG1 | 2 |
| GO:0070486 | BP | GO:0070486 | leukocyte aggregation | 2/70 | 13/18723 | 0.00104651905167712 | 0.0272782732797763 | 0.0222236742559116 | S100A9/S100A8 | 2 |
| GO:0032103 | BP | GO:0032103 | positive regulation of response to external stimulus | 7/70 | 427/18723 | 0.00106306598907936 | 0.0272782732797763 | 0.0222236742559116 | S100A9/S100A8/S100A7/S100A12/NFKBIZ/OASL/ARG1 | 7 |
| GO:1990266 | BP | GO:1990266 | neutrophil migration | 4/70 | 122/18723 | 0.00112909384793551 | 0.0284044589588483 | 0.023141180412796 | S100A9/S100A8/S100A12/CCL20 | 4 |
| GO:0009158 | BP | GO:0009158 | ribonucleoside monophosphate catabolic process | 2/70 | 14/18723 | 0.00121799096127678 | 0.0300515846791943 | 0.0244830976629117 | GDA/UPP1 | 2 |
| GO:0097529 | BP | GO:0097529 | myeloid leukocyte migration | 5/70 | 220/18723 | 0.00139348073733368 | 0.033310050070523 | 0.0271377771834346 | S100A9/S100A8/S100A7/S100A12/CCL20 | 5 |
| GO:0034638 | BP | GO:0034638 | phosphatidylcholine catabolic process | 2/70 | 15/18723 | 0.00140198184240705 | 0.033310050070523 | 0.0271377771834346 | GDPD3/APOC1 | 2 |
| GO:0019079 | BP | GO:0019079 | viral genome replication | 4/70 | 131/18723 | 0.00146871406775354 | 0.034261093616869 | 0.0279125946273544 | ZC3H12A/IFI27/OASL/ISG15 | 4 |
| GO:0017014 | BP | GO:0017014 | protein nitrosylation | 2/70 | 16/18723 | 0.00159839838828514 | 0.0357540481355844 | 0.029128908232051 | S100A9/S100A8 | 2 |
| GO:0018119 | BP | GO:0018119 | peptidyl-cysteine S-nitrosylation | 2/70 | 16/18723 | 0.00159839838828514 | 0.0357540481355844 | 0.029128908232051 | S100A9/S100A8 | 2 |
| GO:0009116 | BP | GO:0009116 | nucleoside metabolic process | 3/70 | 62/18723 | 0.0016163170630272 | 0.0357540481355844 | 0.029128908232051 | GDA/TYMP/UPP1 | 3 |
| GO:0030595 | BP | GO:0030595 | leukocyte chemotaxis | 5/70 | 230/18723 | 0.00169446981831107 | 0.0368475385914086 | 0.0300197775126297 | S100A9/S100A8/S100A7/S100A12/CCL20 | 5 |
| GO:0032496 | BP | GO:0032496 | response to lipopolysaccharide | 6/70 | 343/18723 | 0.00177119687513782 | 0.0373933157973925 | 0.0304644235031471 | S100A9/S100A8/S100A7/ZC3H12A/LCN2/ARG1 | 6 |
| GO:0055076 | BP | GO:0055076 | transition metal ion homeostasis | 4/70 | 138/18723 | 0.0017778583504606 | 0.0373933157973925 | 0.0304644235031471 | S100A9/S100A8/HEPHL1/LCN2 | 4 |
| GO:0050918 | BP | GO:0050918 | positive chemotaxis | 3/70 | 66/18723 | 0.00193491353054543 | 0.0400402267691901 | 0.0326208681805027 | DEFB4A/DEFB103B/DEFB103A | 3 |
| GO:0050729 | BP | GO:0050729 | positive regulation of inflammatory response | 4/70 | 142/18723 | 0.00197342848991141 | 0.0401890278183547 | 0.0327420967499087 | S100A9/S100A8/S100A12/NFKBIZ | 4 |
| GO:0002544 | BP | GO:0002544 | chronic inflammatory response | 2/70 | 18/18723 | 0.00202813777171795 | 0.0406578243924083 | 0.0331240264361172 | S100A9/S100A8 | 2 |
| GO:0002523 | BP | GO:0002523 | leukocyte migration involved in inflammatory response | 2/70 | 19/18723 | 0.00226127651312012 | 0.0425824985627023 | 0.034692063069913 | S100A9/S100A8 | 2 |
| GO:0009223 | BP | GO:0009223 | pyrimidine deoxyribonucleotide catabolic process | 2/70 | 19/18723 | 0.00226127651312012 | 0.0425824985627023 | 0.034692063069913 | TYMP/UPP1 | 2 |
| GO:0044827 | BP | GO:0044827 | modulation by host of viral genome replication | 2/70 | 19/18723 | 0.00226127651312012 | 0.0425824985627023 | 0.034692063069913 | ZC3H12A/IFI27 | 2 |
| GO:2000319 | BP | GO:2000319 | regulation of T-helper 17 cell differentiation | 2/70 | 19/18723 | 0.00226127651312012 | 0.0425824985627023 | 0.034692063069913 | ZC3H12A/NFKBIZ | 2 |
| GO:0002548 | BP | GO:0002548 | monocyte chemotaxis | 3/70 | 70/18723 | 0.00229009540204712 | 0.0425824985627023 | 0.034692063069913 | S100A7/S100A12/CCL20 | 3 |
| GO:0045824 | BP | GO:0045824 | negative regulation of innate immune response | 3/70 | 71/18723 | 0.00238477135556527 | 0.0437094521312892 | 0.0356101948282153 | SERPINB4/ARG1/ISG15 | 3 |
| GO:0009615 | BP | GO:0009615 | response to virus | 6/70 | 367/18723 | 0.00248544920519812 | 0.0446639514251449 | 0.0363878276778676 | ZC3H12A/IFI27/OASL/FOSL1/IFI6/ISG15 | 6 |
| GO:0009129 | BP | GO:0009129 | pyrimidine nucleoside monophosphate metabolic process | 2/70 | 20/18723 | 0.0025064727222217 | 0.0446639514251449 | 0.0363878276778676 | TYMP/UPP1 | 2 |
| GO:0009166 | BP | GO:0009166 | nucleotide catabolic process | 3/70 | 73/18723 | 0.00258132660294444 | 0.0453676990627085 | 0.0369611725554987 | GDA/TYMP/UPP1 | 3 |
| GO:0007159 | BP | GO:0007159 | leukocyte cell-cell adhesion | 6/70 | 371/18723 | 0.00262294681849114 | 0.0454762265962721 | 0.0370495901957568 | S100A9/S100A8/ZC3H12A/CD24/NFKBIZ/ARG1 | 6 |
| GO:0046470 | BP | GO:0046470 | phosphatidylcholine metabolic process | 3/70 | 74/18723 | 0.00268324653786213 | 0.0459014041076948 | 0.0373959833276785 | FABP5/GDPD3/APOC1 | 3 |
| GO:0006244 | BP | GO:0006244 | pyrimidine nucleotide catabolic process | 2/70 | 21/18723 | 0.00276363559542289 | 0.046654532485889 | 0.0380095588123951 | TYMP/UPP1 | 2 |
| GO:0009123 | BP | GO:0009123 | nucleoside monophosphate metabolic process | 3/70 | 76/18723 | 0.00289447025232435 | 0.0482286406978201 | 0.0392919885243757 | GDA/TYMP/UPP1 | 3 |
| GO:0001533 | CC | GO:0001533 | cornified envelope | 14/68 | 45/19550 | 1.39537892255937e-24 | 1.26979481952902e-22 | 1.07223854049299e-22 | SPRR2A/PI3/SPRR2B/SPRR2D/SPRR2E/SPRR2F/SPRR2G/DSG3/SPRR1B/TGM1/DSC2/CNFN/SPRR1A/CST6 | 14 |
| GO:0034774 | CC | GO:0034774 | secretory granule lumen | 9/68 | 322/19550 | 1.67483233426147e-06 | 4.32509480086774e-05 | 3.6521910984771e-05 | S100A9/S100A8/SERPINB3/S100A7/S100A12/FABP5/HPSE/LCN2/ARG1 | 9 |
| GO:0060205 | CC | GO:0060205 | cytoplasmic vesicle lumen | 9/68 | 325/19550 | 1.80763684049186e-06 | 4.32509480086774e-05 | 3.6521910984771e-05 | S100A9/S100A8/SERPINB3/S100A7/S100A12/FABP5/HPSE/LCN2/ARG1 | 9 |
| GO:0031983 | CC | GO:0031983 | vesicle lumen | 9/68 | 327/19550 | 1.90114057181e-06 | 4.32509480086774e-05 | 3.6521910984771e-05 | S100A9/S100A8/SERPINB3/S100A7/S100A12/FABP5/HPSE/LCN2/ARG1 | 9 |
| GO:0005775 | CC | GO:0005775 | vacuolar lumen | 6/68 | 174/19550 | 3.16017409356216e-05 | 0.000575151685028313 | 0.000485668860694816 | SERPINB3/S100A7/FABP5/HPSE/SERPINB13/ARG1 | 6 |
| GO:0035578 | CC | GO:0035578 | azurophil granule lumen | 4/68 | 91/19550 | 0.000284921444115151 | 0.00432130856907979 | 0.00364899393340457 | SERPINB3/S100A7/FABP5/ARG1 | 4 |
| GO:0035580 | CC | GO:0035580 | specific granule lumen | 3/68 | 62/19550 | 0.0013144054924944 | 0.0170872714024272 | 0.0144288121732468 | HPSE/LCN2/ARG1 | 3 |
| GO:0045111 | CC | GO:0045111 | intermediate filament cytoskeleton | 5/68 | 258/19550 | 0.00203972872550702 | 0.0189983541703392 | 0.016042566274549 | S100A8/KRT6A/KRT6C/KRT6B/KRT16 | 5 |
| GO:0005766 | CC | GO:0005766 | primary lysosome | 4/68 | 155/19550 | 0.0020877312275098 | 0.0189983541703392 | 0.016042566274549 | SERPINB3/S100A7/FABP5/ARG1 | 4 |
| GO:0042582 | CC | GO:0042582 | azurophil granule | 4/68 | 155/19550 | 0.0020877312275098 | 0.0189983541703392 | 0.016042566274549 | SERPINB3/S100A7/FABP5/ARG1 | 4 |
| GO:0030057 | CC | GO:0030057 | desmosome | 2/68 | 25/19550 | 0.0033961400955527 | 0.0280953407904814 | 0.0237242322464447 | DSG3/DSC2 | 2 |
| GO:0045095 | CC | GO:0045095 | keratin filament | 3/68 | 96/19550 | 0.00456531480257612 | 0.0346203039195356 | 0.0292340333849173 | KRT6A/KRT6C/KRT6B | 3 |
| GO:0005796 | CC | GO:0005796 | Golgi lumen | 3/68 | 104/19550 | 0.00570497003903155 | 0.0399347902732208 | 0.0337216852509557 | DEFB4A/DEFB103B/DEFB103A | 3 |
| GO:0005882 | CC | GO:0005882 | intermediate filament | 4/68 | 217/19550 | 0.00690851694751285 | 0.0449053601588335 | 0.0379189276066495 | KRT6A/KRT6C/KRT6B/KRT16 | 4 |
| GO:0050786 | MF | GO:0050786 | RAGE receptor binding | 4/66 | 10/18368 | 3.14083528192342e-08 | 5.52787009618522e-06 | 4.03349373047008e-06 | S100A9/S100A8/S100A7/S100A12 | 4 |
| GO:0004867 | MF | GO:0004867 | serine-type endopeptidase inhibitor activity | 6/66 | 98/18368 | 1.38660201957024e-06 | 9.6522401755625e-05 | 7.04290252044632e-05 | SERPINB4/PI3/SERPINB3/SERPINB13/A2ML1/WFDC12 | 6 |
| GO:0061134 | MF | GO:0061134 | peptidase regulator activity | 8/66 | 230/18368 | 1.64526821174361e-06 | 9.6522401755625e-05 | 7.04290252044632e-05 | SERPINB4/PI3/SERPINB3/SERPINB13/A2ML1/PRSS22/CST6/WFDC12 | 8 |
| GO:0004866 | MF | GO:0004866 | endopeptidase inhibitor activity | 7/66 | 180/18368 | 3.69420071296371e-06 | 0.000162544831370403 | 0.000118603286047782 | SERPINB4/PI3/SERPINB3/SERPINB13/A2ML1/CST6/WFDC12 | 7 |
| GO:0030414 | MF | GO:0030414 | peptidase inhibitor activity | 7/66 | 187/18368 | 4.75210106639144e-06 | 0.000167273957536979 | 0.000122053964231528 | SERPINB4/PI3/SERPINB3/SERPINB13/A2ML1/CST6/WFDC12 | 7 |
| GO:0061135 | MF | GO:0061135 | endopeptidase regulator activity | 7/66 | 194/18368 | 6.05126693292645e-06 | 0.000177503830032509 | 0.00012951834488018 | SERPINB4/PI3/SERPINB3/SERPINB13/A2ML1/CST6/WFDC12 | 7 |
| GO:0005504 | MF | GO:0005504 | fatty acid binding | 4/66 | 39/18368 | 1.13749813968565e-05 | 0.00028599953226382 | 0.000208683869235562 | S100A9/S100A8/FABP5/APOC1 | 4 |
| GO:0048306 | MF | GO:0048306 | calcium-dependent protein binding | 5/66 | 88/18368 | 1.59783053749575e-05 | 0.000351522718249065 | 0.000256493849440107 | S100A9/S100A8/S100A7/S100A12/S100A2 | 5 |
| GO:0030280 | MF | GO:0030280 | structural constituent of skin epidermis | 3/66 | 15/18368 | 1.95486986833065e-05 | 0.000382285663140216 | 0.000278940495831976 | PI3/SPRR2E/SPRR1A | 3 |
| GO:0048020 | MF | GO:0048020 | CCR chemokine receptor binding | 4/66 | 48/18368 | 2.62642477851321e-05 | 0.000462250761018325 | 0.000337288234714328 | DEFB4A/DEFB103B/DEFB103A/CCL20 | 4 |
| GO:0002020 | MF | GO:0002020 | protease binding | 5/66 | 135/18368 | 0.000124193752607995 | 0.00185946103757316 | 0.00135678377143496 | SERPINB4/SERPINB3/SERPINB13/LCN2/A2ML1 | 5 |
| GO:0042379 | MF | GO:0042379 | chemokine receptor binding | 4/66 | 72/18368 | 0.000130170613216371 | 0.00185946103757316 | 0.00135678377143496 | DEFB4A/DEFB103B/DEFB103A/CCL20 | 4 |
| GO:0033293 | MF | GO:0033293 | monocarboxylic acid binding | 4/66 | 73/18368 | 0.000137346553911654 | 0.00185946103757316 | 0.00135678377143496 | S100A9/S100A8/FABP5/APOC1 | 4 |
| GO:0042056 | MF | GO:0042056 | chemoattractant activity | 3/66 | 37/18368 | 0.000315490173372859 | 0.00396616217954451 | 0.00289397001139013 | DEFB4A/DEFB103B/DEFB103A | 3 |
| GO:0035325 | MF | GO:0035325 | Toll-like receptor binding | 2/66 | 12/18368 | 0.000819995682957794 | 0.00962128268003812 | 0.0070203139172527 | S100A9/S100A8 | 2 |
| GO:0004869 | MF | GO:0004869 | cysteine-type endopeptidase inhibitor activity | 3/66 | 56/18368 | 0.00107206443324081 | 0.0116508579644586 | 0.00850122411282265 | SERPINB3/SERPINB13/CST6 | 3 |
| GO:0036041 | MF | GO:0036041 | long-chain fatty acid binding | 2/66 | 14/18368 | 0.00112536696247611 | 0.0116508579644586 | 0.00850122411282265 | S100A9/S100A8 | 2 |
| GO:0008970 | MF | GO:0008970 | phospholipase A1 activity | 2/66 | 16/18368 | 0.00147713495185956 | 0.0136829342909096 | 0.00998395923140534 | PLA2G4D/PLA2G4E | 2 |
| GO:0047498 | MF | GO:0047498 | calcium-dependent phospholipase A2 activity | 2/66 | 16/18368 | 0.00147713495185956 | 0.0136829342909096 | 0.00998395923140534 | PLA2G4D/PLA2G4E | 2 |
| GO:0004252 | MF | GO:0004252 | serine-type endopeptidase activity | 4/66 | 174/18368 | 0.00355079915625795 | 0.030997495940508 | 0.0226177901001314 | TMPRSS11D/PRSS22/KLK10/KLK6 | 4 |
| GO:0031406 | MF | GO:0031406 | carboxylic acid binding | 4/66 | 176/18368 | 0.00369856485653788 | 0.030997495940508 | 0.0226177901001314 | S100A9/S100A8/FABP5/APOC1 | 4 |
| GO:0008236 | MF | GO:0008236 | serine-type peptidase activity | 4/66 | 191/18368 | 0.00494212385514314 | 0.0395369908411451 | 0.0288487612596872 | TMPRSS11D/PRSS22/KLK10/KLK6 | 4 |
| GO:0017171 | MF | GO:0017171 | serine hydrolase activity | 4/66 | 195/18368 | 0.00531582825030449 | 0.0406776422631996 | 0.0296810547614256 | TMPRSS11D/PRSS22/KLK10/KLK6 | 4 |
| GO:0005200 | MF | GO:0005200 | structural constituent of cytoskeleton | 3/66 | 103/18368 | 0.00606716641713684 | 0.0422995700879764 | 0.0308645188440976 | KRT6A/KRT6B/KRT16 | 3 |
| GO:0004620 | MF | GO:0004620 | phospholipase activity | 3/66 | 104/18368 | 0.00623152290531212 | 0.0422995700879764 | 0.0308645188440976 | PLA2G4D/GDPD3/PLA2G4E | 3 |
| GO:0004623 | MF | GO:0004623 | phospholipase A2 activity | 2/66 | 33/18368 | 0.00624880012663288 | 0.0422995700879764 | 0.0308645188440976 | PLA2G4D/PLA2G4E | 2 |

**Supplementary Table 8 DEG_keygene_enrichKEGG.**

| ID | Description | GeneRatio | BgRatio | pvalue | p.adjust | qvalue | geneID | Count |  |
| --- | --- | --- | --- | --- | --- | --- | --- | --- | --- |
| hsa04657 | hsa04657 | IL-17 signaling pathway | 7/35 | 94/8292 | 9.96593755702949e-08 | 6.47785941206917e-06 | 5.24523029317342e-06 | DEFB4A/S100A9/S100A8/S100A7/LCN2/CCL20/FOSL1 | 7 |
| hsa05150 | hsa05150 | Staphylococcus aureus infection | 4/35 | 96/8292 | 0.000670967220457515 | 0.0182666215550843 | 0.0147907866842788 | DEFB4A/DEFB103B/DEFB103A/KRT16 | 4 |
| hsa05146 | hsa05146 | Amoebiasis | 4/35 | 102/8292 | 0.000843074841003889 | 0.0182666215550843 | 0.0147907866842788 | SERPINB4/SERPINB3/SERPINB13/ARG1 | 4 |
| hsa00565 | hsa00565 | Ether lipid metabolism | 3/35 | 50/8292 | 0.00117881740528635 | 0.0191557828359031 | 0.0155107553327151 | PLA2G4D/GDPD3/PLA2G4E | 3 |
